# Supplementary material for: Genetic Basis of Body Color and Spotting Pattern in Redheaded Pine Sawfly Larvae ( Neodiprion lecontei )
Source: Oxford University Press journal article supplement (doi:10.1534/genetics.118.300793), 2018-02-28
Supplement: 0291_files2.xlsx [file 0291_files2.xlsx]

## Sheet: Sheet1
Table S7. Probable locations of candidate pigmentation and patterning genes in the N. lecontei genome. N. lecontei gene ID, NCBI reference sequence numbers, predicted protein products, and approximate location are given for the top BLAST hit for each candidate gene. In the last 18 columns, a "yes" signifies that the scaffold containing a particular candidate gene was located in or within 1 Mb of …
Candidate gene name	Candidate protein name	Candidate protein function	N. lecontei Gene ID	N. lecontei NCBI Reference sequence	N. lecontei predicted protein product	Scaffold	Linkage group (chromosome)	Scaffold position on chromosome	Yellow-1	Yellow-2	Yellow-3	Yellow-4	Yellow-5	Yellow-6	PC1-1	PC1-2	PC2-1	PC2-2	PC2-3	PC2-4	SpotNum-1	SpotNum-2	SpotNum-3	SpotNum-4	SpotArea-1	SpotArea-2
Abd-B	Abdominal-B	Pigmentation patterning	107224286	XM_015664283.1	homeobox protein abdominal-B-like	63	1	2062407	no	no	no	no	no	no	no	no	no	no	no	no	no	no	no	no	no	no
LpR1	Lipophorin receptor	carotenoid transport	107222018	XM_015661217.1	very low-density lipoprotein receptor-like	43	1	20743569	no	no	no	no	no	no	no	no	no	no	no	no	no	no	no	no	no	no
MTP	microsomal triglyceride transfer protein	carotenoid transport	107219418	XM_015657633.1	microsomal triglyceride transfer protein large subunit	29	1	21708325	no	no	no	no	no	no	no	no	no	no	no	no	no	no	no	no	no	no
yellow-b	Yellow-b	yellow-family	107228145	XM_015669520.1	protein yellow-like	165	1	23232959	no	no	no	no	no	no	no	no	no	no	no	no	no	no	no	no	no	no
BmGC-I	receptor-type guanylyl cyclase	Pigmentation patterning	107225742	XM_015666303.1	atrial natriuretic peptide receptor 1	803	1	26671985	no	no	no	no	no	no	no	no	no	no	no	no	no	no	no	no	no	no
bab2	Protein bric-a-brac 2	Pigmentation patterning	107216974	XM_015654321.1	protein bric-a-brac 2-like	188	2	1127826	no	no	no	no	no	no	no	no	no	no	no	no	no	no	no	no	no	no
cort	Protein cortex	Pigmentation patterning	107216697	XM_015653957.1	fizzy-related protein homolog	178	2	2185722	no	no	no	no	no	no	no	no	no	no	no	no	no	no	no	no	no	no
tan	Tan protein	Melanin biosynthesis and patterning	107216708	XM_015653972.1	uncharacterized LOC107216708	178	2	2185722	no	no	no	no	no	no	no	no	no	no	no	no	no	no	no	no	no	no
yellow-x1	Yellow-x1	yellow-family	107221939	XM_015661121.1	protein yellow-like	422	2	7359686	no	YES	no	no	no	no	no	no	YES	no	no	no	YES	no	no	no	YES	no
yellow-x1	Yellow-x1	yellow-family	107221940	XM_015661122.1	major royal jelly protein 1-like	422	2	7359686	no	YES	no	no	no	no	no	no	YES	no	no	no	YES	no	no	no	YES	no
CBP	Carotenoid-binding protein	carotenoid transport	107218834	XM_015656854.1	stAR-related lipid transfer protein 3	268	2	21140368	no	no	no	no	no	no	no	no	no	no	no	no	no	no	no	no	no	no
salr	Spalt-related protein	Pigmentation patterning	107225879	XM_015666482.1	homeotic protein spalt-major-like	83	2	21996592	no	no	no	no	no	no	no	no	no	no	no	no	no	no	no	no	no	no
wg (WNT1)	Protein wingless (Wnt-1)	Pigmentation patterning	107217011	XM_015654359.1	protein Wnt-1	19	2	22468538	no	no	no	no	no	no	no	no	no	no	no	no	no	no	no	no	no	no
Mrjp8	Major royal jelly protein 8	yellow-family	107225390	XM_015665842.1	major royal jelly protein 1-like	769	2	29734136	no	no	YES	no	no	no	no	no	no	YES	no	no	no	YES	no	no	no	YES
Mrjp8	Major royal jelly protein 8	yellow-family	107225391	XM_015665845.1	major royal jelly protein 1-like	769	2	29734136	no	no	YES	no	no	no	no	no	no	YES	no	no	no	YES	no	no	no	YES
yellow-e3	Yellow-e3	yellow-family	107223421	XM_015663098.1	uncharacterized LOC107223421	548	2	30827488	no	no	YES	no	no	no	no	no	no	YES	no	no	no	YES	no	no	no	YES
yellow-e	Yellow-e	yellow-family (melanin biosynthesis and patterning)	107223425	XM_015663103.1	protein yellow-like	548	2	30827488	no	no	YES	no	no	no	no	no	no	YES	no	no	no	YES	no	no	no	YES
yellow-g2	Yellow-g2	yellow-family	107223431	XM_015663109.1	major royal jelly protein 1-like	548	2	30827488	no	no	YES	no	no	no	no	no	no	YES	no	no	no	YES	no	no	no	YES
yellow-g2	Yellow-g2	yellow-family	107223422	XM_015663099.1	protein yellow-like	548	2	30827488	no	no	YES	no	no	no	no	no	no	YES	no	no	no	YES	no	no	no	YES
yellow-g2	Yellow-g2	yellow-family	107223432	XM_015663110.1	protein yellow-like	548	2	30827488	no	no	YES	no	no	no	no	no	no	YES	no	no	no	YES	no	no	no	YES
yellow-g2	Yellow-g2	yellow-family	107223433	XM_015663112.1	major royal jelly protein 1-like	548	2	30827488	no	no	YES	no	no	no	no	no	no	YES	no	no	no	YES	no	no	no	YES
yellow-h	Yellow-h	yellow-family	107216515	XM_015653726.1	protein yellow-like	170	2	30950518	no	no	YES	no	no	no	no	no	no	YES	no	no	no	YES	no	no	no	YES
yellow-x2	Yellow-x2	yellow-family	107216489	XM_015653684.1	major royal jelly protein 1-like	170	2	30950518	no	no	YES	no	no	no	no	no	no	YES	no	no	no	YES	no	no	no	YES
Mrjp9	Major royal jelly protein 9	yellow-family	107216477	XM_015653672.1	major royal jelly protein 1-like	170	2	30950518	no	no	YES	no	no	no	no	no	no	YES	no	no	no	YES	no	no	no	YES
pale	Tyrosine hydroxylase (Tyrosine 3-monooxygenase)	Melanin biosynthesis and patterning	107220784	XM_015659513.1	tyrosine 3-monooxygenase	36	2	31308586	no	no	YES	no	no	no	no	no	no	YES	no	no	no	YES	no	no	no	YES
Mrjp1	Major royal jelly protein 1	yellow-family	107220794	XM_015659529.1	major royal jelly protein 1-like	36	2	31308586	no	no	YES	no	no	no	no	no	no	YES	no	no	no	YES	no	no	no	YES
Mrjp9	Major royal jelly protein 9	yellow-family	107220789	XM_015659523.1	major royal jelly protein 2-like	36	2	31308586	no	no	YES	no	no	no	no	no	no	YES	no	no	no	YES	no	no	no	YES
Mrjp9	Major royal jelly protein 9	yellow-family	107220777	XM_015659499.1	major royal jelly protein 1-like	36	2	31308586	no	no	YES	no	no	no	no	no	no	YES	no	no	no	YES	no	no	no	YES
Mrjp5	Major royal jelly protein 5	yellow-family	107220771	XM_015659492.1	major royal jelly protein 1-like	36	2	31308586	no	no	YES	no	no	no	no	no	no	YES	no	no	no	YES	no	no	no	YES
engrailed	Engrailed	Pigmentation patterning	107222646	XM_015662092.1	homeobox protein engrailed-1a-like	474	3	176669	no	no	no	no	no	no	no	no	no	no	no	no	no	no	no	no	no	no
e	Ebony protein (N-β-alanyl-dopamine synthase)	Melanin biosynthesis and patterning	107223729	XM_015663513.1	dimodular nonribosomal peptide synthase-like	574	3	3356515	no	no	no	no	no	no	no	no	no	no	no	no	no	no	no	no	no	no
ninaB	Carotenoid isomerooxygenase	carotenoid breakdown	107217517	XM_015655078.1	carotenoid isomerooxygenase-like	207	3	5874704	no	no	no	no	no	no	no	no	no	no	no	no	no	no	no	no	no	no
b	Black protein (Aspartate decarboxylase)	Melanin biosynthesis and patterning	107227436	XM_015668579.1	cysteine sulfinic acid decarboxylase	144	3	9988627	no	no	no	no	no	no	no	no	no	no	no	no	no	no	no	no	no	no
apoLTP-III	aplolipoprotein of lipid transfer particle-III	carotenoid transport	107223410	XM_015663088.1	uncharacterized LOC107223410	117	3	10412238	no	no	no	no	no	no	no	no	no	no	no	no	no	no	no	no	no	no
yellow-x2	Yellow-x2	yellow-family	107223932	XM_015663799.1	major royal jelly protein 3-like	6	3	13999422	no	no	no	no	no	no	no	no	no	no	no	no	no	no	no	no	no	no
bi	Optomotor-blind protein	Pigmentation patterning	107224873	XM_015665107.1	optomotor-blind protein-like	121	3	14725281	no	no	no	no	no	no	no	no	no	no	no	no	no	no	no	no	no	no
dpp	Protein decapentaplegic	Pigmentation patterning	107216639	XM_015653890.1	protein decapentaplegic-like	175	3	16373244	no	no	no	no	no	no	no	no	no	no	no	no	no	no	no	no	no	no
BmMFS	cis, cis-muconate transporter protein	Pigmentation patterning	107221080	XM_015659954.1	putative metabolite transport protein HI_1104	378	3	20702902	no	no	no	no	no	no	no	no	no	no	no	no	no	no	no	no	no	no
Cameo1	Cameo1 (scavenger receptor class B member 3)	carotenoid transport	107223141	XM_015662735.1	protein croquemort-like	518	3	27671160	no	no	no	YES	no	no	YES	no	no	no	YES	no	no	no	no	no	no	no
Cameo2	Cameo2 (scavenger receptor class B member 4 )	carotenoid transport	107223140	XM_015662731.1	protein croquemort-like	518	3	27671160	no	no	no	YES	no	no	YES	no	no	no	YES	no	no	no	no	no	no	no
Eip75B	nuclear receptor 75	Pigmentation patterning	107222400	XM_015661758.1	nuclear hormone receptor E75	459	4	1378493	no	no	no	no	no	no	no	no	no	no	no	no	no	no	no	no	no	no
bab1	Protein bric-a-brac 1	Pigmentation patterning	107226367	XM_015667162.1	protein bric-a-brac 1-like	911	4	4311550	no	no	no	no	no	no	no	no	no	no	no	no	no	no	no	no	no	no
apt	Apontic	Pigmentation patterning	107220885	XM_015659657.1	uncharacterized LOC107220885	366	4	15454465	no	no	no	no	no	no	no	no	no	no	no	no	no	no	no	no	no	no
SCRB1	scavenger receptor class B member 1	carotenoid transport	107222831	XM_015662347.1	scavenger receptor class B member 1	49	4	17999652	no	no	no	no	no	no	no	no	no	no	no	no	no	no	no	no	no	no
SCRB15	scavenger receptor class B member 1 like protein 15	carotenoid transport	107217680	XM_015655304.1	scavenger receptor class B member 1	213	4	21458069	no	no	no	no	no	no	no	no	no	no	no	no	no	no	no	no	no	no
Dll	Homeotic protein distal-less	Pigmentation patterning	107221417	XM_015660402.1	homeotic protein distal-less	391	4	23650032	no	no	no	no	no	no	no	no	no	no	no	no	no	no	no	no	no	no
Ddc	DOPA decarboxylase (Aromatic-L-amino-acid decarboxylase)	Melanin biosynthesis and patterning	107221191	XM_015660103.1	tyrosine decarboxylase-like	382	5	2450038	no	no	no	no	no	no	no	no	no	no	no	no	no	no	no	no	no	no
yellow-y	Yellow-y	yellow-family	107222436	XM_015661809.1	protein yellow-like	141	5	3826549	no	no	no	no	no	no	no	no	no	no	no	no	no	no	no	no	no	no
apoLTP-II/I	apolipoprotein of lipid transfer particle-I/II	carotenoid transport	107228095	XM_015669457.1	uncharacterized LOC107228095	164	5	20630884	no	no	no	no	YES	YES	no	YES	no	no	no	YES	no	no	no	no	no	no
yellow-b	Yellow-b	yellow-family	107227308	XM_015668416.1	protein yellow-like	46	6	4376269	no	no	no	no	no	no	no	no	no	no	no	no	no	no	no	no	no	no
yellow-b	Yellow-b	yellow-family	107227310	XM_015668419.1	protein yellow-like	46	6	4376269	no	no	no	no	no	no	no	no	no	no	no	no	no	no	no	no	no	no
yellow-b	Yellow-b	yellow-family	107227309	XM_015668417.1	protein yellow-like	46	6	4376269	no	no	no	no	no	no	no	no	no	no	no	no	no	no	no	no	no	no
Mrjp1-like	Major royal jelly protein 1-like	yellow-family	107223571	XM_015663284.1	major royal jelly protein 1-like	558	6	6396089	no	no	no	no	no	no	no	no	no	no	no	no	no	no	no	no	no	no
Dat	Dopamine N-acetyl transferase	Melanin biosynthesis and patterning	107223418	XM_015663094.1	dopamine N-acetyltransferase-like	547	6	13394107	no	no	no	no	no	no	no	no	no	no	no	no	no	no	no	YES	no	no
dsx	Protein doublesex	Pigmentation patterning	107222953	XM_015662503.1	protein doublesex	501	7	1895752	no	no	no	no	no	no	no	no	no	no	no	no	no	no	no	no	no	no
apolpp (or I)	apolipophorin protein	carotenoid transport	107219739	XM_015658064.1	apolipophorins	301	7	3748428	no	no	no	no	no	no	no	no	no	no	no	no	no	no	no	no	no	no
pts	6-pyruvoyltetrahydropterin synthase	Pigmentation patterning	107225414	XM_015665875.1	6-pyruvoyl tetrahydrobiopterin synthase	77	7	15064627	no	no	no	no	no	no	no	no	no	no	no	no	no	no	no	no	no	no
Lac2	Laccase 2	Melanin biosynthesis and patterning	107226665	XM_015667557.1	laccase-like	982	unplaced	unplaced	??	??	??	??	??	??	??	??	??	??	??	??	??	??	??	??	??	??
pdm3	POU domain protein	Melanin biosynthesis and patterning	107224580	XM_015664683.1	POU domain, class 6, transcription factor 1	666	unplaced	unplaced	??	??	??	??	??	??	??	??	??	??	??	??	??	??	??	??	??	??
yellow-x2	Yellow-x2	yellow-family	107224651	XM_015664789.1	major royal jelly protein 1-like	679	unplaced	unplaced	??	??	??	??	??	??	??	??	??	??	??	??	??	??	??	??	??	??
Mrjp7	Major royal jelly protein 7	yellow-family	107220269	XM_015658797.1	major royal jelly protein 1-like	3311	unplaced	unplaced	??	??	??	??	??	??	??	??	??	??	??	??	??	??	??	??	??	??
