# Supplementary material for: Genetic Basis of Body Color and Spotting Pattern in Redheaded Pine Sawfly Larvae ( Neodiprion lecontei )
Source: Oxford University Press journal article supplement (doi:10.1534/genetics.118.300793), 2018-02-28
Supplement: 0291_files6.xlsx [file 0291_files6.xlsx]

## Sheet: Family8
Index	S1-P8299	S1-P8319	S1-P8326	S1-P8339	S1-P8376	S1-P71772	S1-P71802	S1-P79917	S1-P131422	S1-P135507	S1-P135515	S1-P135523	S1-P135525	S1-P135554	S1-P135567	S1-P218095	S1-P218095	S1-P218116	S1-P218116	S1-P218122	S1-P218122	S1-P221910	S1-P221912	S1-P222734	S1-P263186	S1-P275717	S1-P275719	S1-P289012	S1-P289026	S1-P320998	S1-P342018	S1-P342021	S1-P354958	S1-P381154	S1-P390152	S1-P607732	S1-P607747	S1-P607753	S1-P634729	S1-P778957	S1-P779017	S1-P822501	S1-P841680	S1-P845653	S1-P845685	S1-P906467	S1-P950743	S1-P972596	S1-P972666
	1	1	1	1	1	1	1	1	1	1	1	1	1	1	1	1	1	1	1	1	1	1	1	1	1	1	1	1	1	1	1	1	1	1	1	1	1	1	1	1	1	1	1	1	1	1	1	1	1
354	A	A	A	A	A	B	B	B	A	A	A	A	A	A	A	A	B	A	B	A	B	B	B	A	A	A	A	A	A	A	A	A	B	A	NA	B	B	B	A	B	B	A	A	A	A	A	A	B	B
355	NA	NA	NA	NA	NA	B	B	B	NA	NA	NA	NA	NA	NA	NA	NA	NA	NA	NA	NA	NA	NA	NA	NA	A	NA	NA	A	A	NA	A	A	NA	A	NA	B	B	B	NA	B	B	A	NA	A	A	NA	A	NA	NA
356	NA	NA	NA	NA	NA	B	B	B	NA	NA	NA	NA	NA	NA	NA	NA	NA	NA	NA	NA	NA	NA	NA	NA	A	NA	NA	A	A	A	A	A	NA	A	NA	B	B	B	A	B	B	A	NA	A	A	NA	A	NA	NA
357	A	A	A	A	A	A	A	A	NA	A	A	A	A	A	A	B	A	B	A	B	A	A	A	NA	A	NA	NA	A	A	A	B	B	A	B	NA	A	A	A	B	A	A	NA	NA	A	A	NA	B	NA	NA
358	A	A	A	A	A	A	A	A	NA	A	A	A	A	A	A	NA	A	NA	A	NA	A	NA	NA	NA	A	NA	NA	A	A	A	B	B	NA	B	NA	A	A	A	B	A	A	NA	NA	NA	NA	NA	NA	NA	NA
359	A	A	A	A	A	A	A	A	NA	A	A	A	A	A	A	B	A	B	A	B	A	NA	NA	A	A	B	B	A	A	A	B	B	NA	B	NA	A	A	A	B	A	A	NA	NA	A	A	NA	B	NA	NA
360	A	A	A	A	A	B	B	B	A	A	A	A	A	A	A	A	NA	A	NA	A	NA	B	B	NA	A	A	A	A	A	A	A	A	B	A	NA	B	B	B	A	B	B	A	NA	A	A	A	A	B	B
361	A	A	A	A	A	B	B	B	NA	A	A	A	A	A	A	A	NA	A	NA	A	NA	NA	NA	NA	A	NA	NA	A	A	A	A	A	NA	A	NA	B	B	B	A	B	B	A	NA	A	A	NA	A	NA	NA
362	A	A	A	A	A	B	B	B	A	A	A	A	A	A	A	A	NA	A	NA	A	NA	NA	NA	NA	A	A	A	A	A	A	A	A	NA	A	NA	B	B	B	A	B	B	A	NA	NA	NA	A	A	B	B
363	A	A	A	A	A	B	B	B	A	A	A	A	A	A	A	A	NA	A	NA	A	NA	NA	NA	NA	A	A	A	A	A	A	A	A	NA	A	NA	B	B	B	A	B	B	A	NA	A	A	A	A	NA	NA
364	A	A	A	A	A	B	B	B	NA	A	A	A	A	A	A	A	NA	A	NA	A	NA	NA	NA	A	A	NA	NA	A	A	A	A	A	NA	A	NA	B	B	B	A	B	B	A	NA	NA	NA	NA	NA	NA	NA
365	A	A	A	A	A	A	A	A	NA	NA	NA	NA	NA	NA	NA	NA	A	NA	A	NA	A	NA	NA	NA	A	B	B	A	A	A	B	B	NA	B	NA	A	A	A	B	A	A	NA	NA	A	A	NA	B	NA	NA
366	A	A	A	A	A	B	B	B	NA	A	A	A	A	A	A	A	NA	A	NA	A	NA	NA	NA	NA	A	NA	NA	A	A	A	A	A	NA	A	NA	B	B	B	A	B	B	A	NA	A	A	A	A	NA	NA
367	A	A	A	A	A	B	B	B	A	A	A	A	A	A	A	A	NA	A	NA	A	NA	NA	NA	A	A	A	A	A	A	A	A	A	B	A	NA	B	B	B	A	B	B	A	NA	A	A	A	A	B	B
368	A	A	A	A	A	B	B	B	A	A	A	A	A	A	A	A	NA	A	NA	A	NA	B	B	NA	A	A	A	A	A	A	A	A	B	A	NA	B	B	B	A	B	B	A	NA	NA	NA	A	A	B	B
369	A	A	A	A	A	B	B	B	A	A	A	A	A	A	A	A	NA	A	NA	A	NA	B	B	A	A	A	A	A	A	A	A	A	NA	A	NA	B	B	B	A	B	B	A	NA	NA	NA	NA	A	B	B
370	A	A	A	A	A	A	A	A	NA	A	A	A	A	A	A	B	A	B	A	B	A	A	A	A	A	B	B	A	A	A	B	B	A	B	NA	A	A	A	B	A	A	NA	A	A	A	NA	B	A	A
371	A	A	A	A	A	A	A	A	NA	NA	NA	NA	NA	NA	NA	NA	A	NA	A	NA	A	NA	NA	NA	A	NA	NA	A	A	A	B	B	NA	B	NA	A	A	A	B	A	A	NA	NA	A	A	NA	B	NA	NA
372	A	A	A	A	A	A	A	A	NA	A	A	A	A	A	A	NA	A	NA	A	NA	A	A	A	A	A	B	B	A	A	A	B	B	A	B	NA	A	A	A	B	A	A	NA	A	A	A	NA	B	A	A
373	A	A	A	A	A	B	B	B	A	A	A	A	A	A	A	A	NA	A	NA	A	NA	NA	NA	A	A	A	A	A	A	A	A	A	B	A	NA	B	B	B	A	B	B	A	NA	NA	NA	A	A	B	B
374	A	A	A	A	A	A	A	A	NA	A	A	A	A	A	A	NA	A	NA	A	NA	A	A	A	A	A	B	B	A	A	A	B	B	A	B	NA	A	A	A	B	A	A	NA	NA	A	A	NA	B	A	A
375	A	A	A	A	A	B	B	B	NA	A	A	A	A	A	A	NA	NA	NA	NA	NA	NA	NA	NA	A	A	A	A	A	A	A	A	A	NA	A	NA	B	B	B	A	B	B	NA	NA	NA	NA	NA	NA	NA	NA
376	A	A	A	A	A	A	A	A	B	A	A	A	A	A	A	NA	A	NA	A	NA	A	A	A	A	A	B	B	A	A	A	B	B	A	B	NA	A	A	A	B	A	A	NA	A	A	A	NA	B	A	A
377	A	A	A	A	A	B	B	B	A	A	A	A	A	A	A	A	NA	A	NA	A	NA	B	B	A	A	A	A	A	A	A	A	A	B	A	NA	B	B	B	A	B	B	A	A	A	A	A	A	B	B
378	A	A	A	A	A	A	A	A	NA	A	A	A	A	A	A	NA	A	NA	A	NA	A	NA	NA	NA	A	NA	NA	A	A	NA	B	B	NA	B	NA	A	A	A	B	A	A	NA	NA	A	A	NA	B	NA	NA
379	A	A	A	A	A	B	B	B	A	A	A	A	A	A	A	A	NA	A	NA	A	NA	B	B	NA	A	A	A	A	A	A	A	A	B	A	NA	B	B	B	A	B	B	A	A	A	A	A	A	NA	NA
380	A	A	A	A	A	B	B	B	A	A	A	A	A	A	A	A	NA	A	NA	A	NA	B	B	NA	A	A	A	A	A	A	A	A	B	A	NA	B	B	B	A	B	B	A	NA	NA	NA	A	A	B	B
381	A	A	A	A	A	A	A	A	NA	A	A	A	A	A	A	NA	A	NA	A	NA	A	A	A	NA	A	NA	NA	A	A	A	B	B	A	B	NA	A	A	A	B	A	A	NA	NA	NA	NA	NA	B	A	A
382	A	A	A	A	A	A	A	A	NA	A	A	A	A	A	A	NA	A	NA	A	NA	A	A	A	A	A	B	B	A	A	A	B	B	A	B	NA	A	A	A	B	A	A	NA	A	A	A	NA	B	A	A
383	A	A	A	A	A	B	B	B	A	A	A	A	A	A	A	A	NA	A	NA	A	NA	B	B	A	A	A	A	A	A	A	A	A	B	A	NA	B	B	B	A	B	B	A	NA	A	A	A	A	B	B
384	A	A	A	A	A	A	A	A	NA	A	A	A	A	A	A	NA	A	NA	A	NA	A	NA	NA	A	A	NA	NA	A	A	A	B	B	A	B	NA	A	A	A	B	A	A	NA	NA	A	A	NA	B	NA	NA
385	A	A	A	A	A	B	B	B	NA	A	A	A	A	A	A	A	NA	A	NA	A	NA	NA	NA	NA	A	A	A	A	A	A	A	A	NA	A	NA	B	B	B	A	B	B	A	NA	A	A	NA	A	B	B
386	A	A	A	A	A	A	A	A	NA	NA	NA	NA	NA	NA	NA	NA	A	NA	A	NA	A	NA	NA	NA	A	NA	NA	A	A	NA	B	B	NA	B	NA	A	A	A	B	A	A	NA	NA	A	A	NA	B	NA	NA
387	A	A	A	A	A	A	A	A	NA	A	A	A	A	A	A	NA	A	NA	A	NA	A	NA	NA	NA	A	B	B	A	A	A	B	B	NA	B	NA	A	A	A	B	A	A	NA	NA	A	A	NA	B	A	A
388	A	A	A	A	A	B	B	B	A	A	A	A	A	A	A	A	NA	A	NA	A	NA	NA	NA	NA	A	A	A	A	A	A	A	A	NA	A	NA	B	B	B	A	B	B	A	NA	A	A	NA	A	B	B
389	A	A	A	A	A	A	A	A	NA	A	A	A	A	A	A	B	A	B	A	B	A	A	A	A	A	B	B	A	A	A	B	B	A	B	NA	A	A	A	B	A	A	NA	NA	A	A	NA	B	A	A
390	A	A	A	A	A	A	A	A	NA	A	A	A	A	A	A	NA	A	NA	A	NA	A	NA	NA	NA	A	NA	NA	A	A	A	B	B	NA	B	NA	A	A	A	NA	A	A	NA	NA	A	A	NA	B	NA	NA
391	A	A	A	A	A	B	B	B	A	A	A	A	A	A	A	A	NA	A	NA	A	NA	B	B	NA	A	A	A	A	A	A	A	A	B	A	NA	B	B	B	A	B	B	A	NA	A	A	A	A	B	B
392	A	A	A	A	A	A	A	A	NA	A	A	A	A	A	A	B	A	B	A	B	A	NA	NA	NA	A	B	B	A	A	A	B	B	NA	B	NA	A	A	A	B	A	A	NA	NA	A	A	NA	B	NA	NA
393	A	A	A	A	A	A	A	A	B	A	A	A	A	A	A	B	A	B	A	B	A	A	A	A	A	B	B	A	A	A	B	B	A	B	NA	A	A	A	B	A	A	NA	A	A	A	NA	B	A	A
394	A	A	A	A	A	A	A	A	B	A	A	A	A	A	A	B	A	B	A	B	A	A	A	A	A	B	B	A	A	A	B	B	A	B	NA	A	A	A	B	A	A	NA	A	A	A	NA	B	A	A
395	A	A	A	A	A	A	A	A	B	A	A	A	A	A	A	NA	A	NA	A	NA	A	A	A	NA	A	B	B	A	A	A	B	B	A	B	NA	A	A	A	B	A	A	NA	NA	A	A	NA	B	A	A
396	A	A	A	A	A	A	A	A	NA	A	A	A	A	A	A	B	A	B	A	B	A	NA	NA	A	A	B	B	A	A	A	B	B	A	B	NA	A	A	A	B	A	A	NA	NA	A	A	NA	B	A	A
397	A	A	A	A	A	B	B	B	NA	A	A	A	A	A	A	NA	NA	NA	NA	NA	NA	NA	NA	NA	A	A	A	A	A	NA	A	A	NA	A	NA	B	B	B	A	B	B	A	NA	NA	NA	NA	A	B	B
398	A	A	A	A	A	B	B	B	A	A	A	A	A	A	A	A	NA	A	NA	A	NA	NA	NA	A	A	A	A	A	A	A	A	A	B	A	NA	B	B	B	A	B	B	A	NA	A	A	A	A	B	B
399	A	A	A	A	A	B	B	B	A	A	A	A	A	A	A	A	NA	A	NA	A	NA	B	B	A	A	A	A	A	A	A	A	A	B	A	NA	B	B	B	A	B	B	A	A	A	A	A	A	B	B
400	A	A	A	A	A	A	A	A	NA	A	A	A	A	A	A	NA	A	NA	A	NA	A	A	A	NA	A	B	B	A	A	A	B	B	NA	B	NA	A	A	A	B	A	A	NA	NA	NA	NA	NA	B	A	A
401	A	A	A	A	A	A	A	A	B	A	A	A	A	A	A	NA	A	NA	A	NA	A	A	A	NA	A	B	B	A	A	A	B	B	NA	B	NA	A	A	A	B	A	A	NA	NA	NA	NA	NA	B	A	A
402	A	A	A	A	A	B	B	B	A	A	A	A	A	A	A	A	NA	A	NA	A	NA	NA	NA	NA	A	A	A	A	A	A	A	A	NA	A	NA	B	B	B	A	B	B	A	A	A	A	A	A	B	B
403	A	A	A	A	A	A	A	A	NA	A	A	A	A	A	A	NA	A	NA	A	NA	A	A	A	A	A	B	B	A	A	A	B	B	A	B	NA	A	A	A	B	A	A	NA	A	A	A	NA	B	A	A
404	A	A	A	A	A	A	A	A	NA	A	A	A	A	A	A	NA	A	NA	A	NA	A	NA	NA	A	A	B	B	A	A	A	B	B	A	B	NA	A	A	A	B	A	A	NA	NA	NA	NA	NA	B	A	A
405	A	A	A	A	A	A	A	A	NA	A	A	A	A	A	A	NA	A	NA	A	NA	A	NA	NA	NA	A	NA	NA	A	A	A	B	B	NA	B	NA	A	A	A	B	A	A	NA	NA	A	A	NA	B	NA	NA
406	A	A	A	A	A	A	A	A	NA	A	A	A	A	A	A	NA	A	NA	A	NA	A	NA	NA	NA	A	NA	NA	A	A	A	B	B	NA	B	NA	A	A	A	B	A	A	NA	NA	NA	NA	NA	B	NA	NA
407	A	A	A	A	A	A	A	A	B	A	A	A	A	A	A	B	A	B	A	B	A	A	A	A	A	B	B	A	A	A	B	B	A	B	NA	A	A	A	B	A	A	NA	A	A	A	NA	B	A	A
[truncated: 5,000 more columns]

## Sheet: Family7
Index	S1-P8299	S1-P8319	S1-P8326	S1-P8339	S1-P8376	S1-P71772	S1-P71802	S1-P79917	S1-P131422	S1-P135507	S1-P135515	S1-P135523	S1-P135525	S1-P135554	S1-P135567	S1-P218095	S1-P218095	S1-P218116	S1-P218116	S1-P218122	S1-P218122	S1-P221910	S1-P221912	S1-P222734	S1-P263186	S1-P275717	S1-P275719	S1-P289012	S1-P289026	S1-P320998	S1-P342018	S1-P342021	S1-P354958	S1-P381154	S1-P390152	S1-P607732	S1-P607747	S1-P607753	S1-P634729	S1-P778957	S1-P779017	S1-P822501	S1-P841680	S1-P845653	S1-P845685	S1-P906467	S1-P950743	S1-P972596	S1-P972666
	1	1	1	1	1	1	1	1	1	1	1	1	1	1	1	1	1	1	1	1	1	1	1	1	1	1	1	1	1	1	1	1	1	1	1	1	1	1	1	1	1	1	1	1	1	1	1	1	1
193	B	B	B	B	B	A	A	A	A	B	B	B	B	B	B	A	NA	A	NA	A	NA	NA	NA	NA	B	NA	NA	B	A	B	A	A	NA	A	B	A	A	A	A	A	A	B	B	B	A	B	A	NA	NA
194	B	B	B	B	B	A	A	A	A	B	B	B	B	B	B	A	B	A	B	A	B	NA	NA	B	B	NA	NA	B	A	B	A	A	B	A	B	A	A	A	A	A	A	B	NA	B	A	B	A	A	A
195	B	B	B	B	B	A	A	A	NA	B	B	B	B	B	B	A	B	A	B	A	B	NA	NA	NA	B	NA	NA	B	A	B	A	A	NA	A	B	A	A	A	A	A	A	B	NA	B	A	B	A	A	A
196	B	B	B	B	B	A	A	A	A	B	B	B	B	B	B	NA	A	NA	A	NA	A	A	A	A	A	NA	NA	A	B	A	B	B	A	B	A	A	A	A	B	A	A	NA	A	A	A	NA	B	A	A
197	B	B	B	B	B	A	A	A	NA	B	B	B	B	B	B	A	B	A	B	A	B	A	A	B	B	NA	NA	B	A	B	A	A	B	A	B	A	A	A	A	A	A	B	NA	B	A	B	A	A	A
198	B	B	B	B	B	A	A	A	A	B	B	B	B	B	B	A	B	A	B	A	B	A	A	NA	B	NA	NA	B	A	B	A	A	NA	A	B	A	A	A	A	A	A	B	NA	B	A	B	A	A	A
199	A	A	A	A	A	A	A	A	NA	A	A	A	A	A	A	NA	A	NA	A	NA	A	NA	NA	A	A	NA	NA	A	B	A	B	B	NA	B	A	A	A	A	B	A	A	NA	NA	A	A	NA	B	A	A
200	A	A	A	A	A	A	A	A	NA	A	A	A	A	A	A	NA	A	NA	A	NA	A	NA	NA	NA	A	NA	NA	A	B	A	B	B	A	B	A	A	A	A	B	A	A	NA	NA	A	A	NA	B	A	A
201	B	B	B	B	B	A	A	A	A	B	B	B	B	B	B	A	B	A	B	A	B	NA	NA	B	B	NA	NA	B	A	B	A	A	NA	A	B	A	A	A	A	A	A	B	NA	B	A	NA	A	A	A
202	A	A	A	A	A	A	A	A	NA	A	A	A	A	A	A	NA	A	NA	A	NA	A	NA	NA	A	A	NA	NA	A	B	A	B	B	NA	B	A	A	A	A	B	A	A	NA	NA	NA	NA	NA	B	A	A
203	B	B	B	B	B	A	A	A	A	B	B	B	B	B	B	A	B	A	B	A	B	NA	NA	NA	B	NA	NA	B	A	B	A	A	NA	A	B	A	A	A	A	A	A	B	NA	B	A	B	A	A	A
204	B	B	B	B	B	A	A	A	NA	B	B	B	B	B	B	A	NA	A	NA	A	NA	NA	NA	NA	B	NA	NA	B	A	B	A	A	NA	A	B	A	A	A	A	A	A	NA	NA	NA	NA	NA	NA	NA	NA
205	B	B	B	B	B	A	A	A	A	B	B	B	B	B	B	A	B	A	B	A	B	A	A	B	B	NA	NA	B	A	B	A	A	B	A	B	A	A	A	A	A	A	B	B	B	A	B	A	A	A
206	B	B	B	B	B	A	A	A	A	NA	NA	NA	NA	NA	NA	A	NA	A	NA	A	NA	NA	NA	NA	B	NA	NA	B	A	NA	A	A	NA	A	B	A	A	A	A	A	A	B	NA	B	A	NA	A	NA	NA
207	NA	NA	NA	NA	NA	A	A	A	NA	NA	NA	NA	NA	NA	NA	A	NA	A	NA	A	NA	NA	NA	NA	B	NA	NA	B	A	NA	A	A	NA	A	B	A	A	A	NA	A	A	B	NA	B	A	NA	A	NA	NA
208	B	B	B	B	B	A	A	A	A	B	B	B	B	B	B	A	B	A	B	A	B	A	A	B	B	NA	NA	B	A	B	A	A	NA	A	B	A	A	A	A	A	A	B	B	B	A	B	A	A	A
209	B	B	B	B	B	A	A	A	NA	B	B	B	B	B	B	A	B	A	B	A	B	NA	NA	B	B	NA	NA	B	A	B	A	A	B	A	B	A	A	A	A	A	A	NA	NA	NA	NA	B	A	A	A
210	B	B	B	B	B	A	A	A	A	B	B	B	B	B	B	A	B	A	B	A	B	A	A	B	B	NA	NA	B	A	B	A	A	B	A	B	A	A	A	A	A	A	B	B	B	A	B	A	A	A
211	A	A	A	A	A	A	A	A	NA	A	A	A	A	A	A	B	A	B	A	B	A	A	A	NA	A	NA	NA	A	B	A	B	B	A	B	A	A	A	A	B	A	A	NA	NA	NA	NA	NA	B	A	A
212	A	A	A	A	A	A	A	A	NA	A	A	A	A	A	A	NA	A	NA	A	NA	A	NA	NA	NA	A	NA	NA	A	B	NA	B	B	NA	B	A	A	A	A	B	A	A	NA	NA	NA	NA	NA	B	NA	NA
213	B	B	B	B	B	A	A	A	A	B	B	B	B	B	B	A	B	A	B	A	B	NA	NA	NA	B	NA	NA	B	A	B	A	A	NA	A	B	A	A	A	A	A	A	B	NA	B	A	B	A	NA	NA
214	B	B	B	B	B	A	A	A	A	B	B	B	B	B	B	A	B	A	B	A	B	NA	NA	NA	B	NA	NA	B	A	B	A	A	NA	A	B	A	A	A	A	A	A	B	NA	NA	NA	NA	A	NA	NA
215	A	A	A	A	A	A	A	A	B	A	A	A	A	A	A	NA	A	NA	A	NA	A	A	A	A	A	NA	NA	A	B	A	B	B	A	B	A	A	A	A	B	A	A	NA	A	A	A	NA	B	A	A
216	B	B	B	B	B	A	A	A	A	B	B	B	B	B	B	A	NA	A	NA	A	NA	A	A	NA	B	NA	NA	B	A	B	A	A	NA	A	B	A	A	A	A	A	A	B	NA	NA	NA	B	A	NA	NA
217	A	A	A	A	A	A	A	A	NA	A	A	A	A	A	A	NA	A	NA	A	NA	A	A	A	NA	A	NA	NA	A	B	A	B	B	NA	B	A	A	A	A	B	A	A	NA	NA	A	A	NA	B	A	A
218	A	A	A	A	A	A	A	A	NA	A	A	A	A	A	A	A	B	A	B	A	B	NA	NA	NA	B	NA	NA	B	A	B	A	A	B	A	B	A	A	A	A	A	A	B	B	B	A	NA	A	A	A
219	B	B	B	B	B	A	A	A	A	B	B	B	B	B	B	A	NA	A	NA	A	NA	NA	NA	B	B	NA	NA	B	A	B	A	A	NA	A	B	A	A	A	A	A	A	B	NA	B	A	B	A	NA	NA
220	B	B	B	B	B	A	A	A	NA	B	B	B	B	B	B	A	B	A	B	A	B	A	A	NA	B	NA	NA	B	A	B	A	A	NA	A	B	A	A	A	A	A	A	B	B	B	A	B	A	A	A
221	A	A	A	A	A	A	A	A	B	A	A	A	A	A	A	B	A	B	A	B	A	NA	NA	NA	A	NA	NA	A	B	A	B	B	A	B	A	A	A	A	B	A	A	NA	A	A	A	NA	B	A	A
222	B	B	B	B	B	A	A	A	NA	B	B	B	B	B	B	A	NA	A	NA	A	NA	NA	NA	NA	B	NA	NA	B	A	B	A	A	NA	A	B	A	A	A	A	A	A	B	NA	B	A	NA	A	NA	NA
223	B	B	B	B	B	A	A	A	NA	B	B	B	B	B	B	A	B	A	B	A	B	NA	NA	B	B	NA	NA	B	A	B	A	A	NA	A	B	A	A	A	A	A	A	NA	NA	NA	NA	NA	NA	A	A
224	B	B	B	B	B	A	A	A	A	B	B	B	B	B	B	A	B	A	B	A	B	A	A	B	B	NA	NA	B	A	B	A	A	B	A	B	A	A	A	A	A	A	B	B	B	A	B	A	A	A
225	B	B	B	B	B	A	A	A	A	B	B	B	B	B	B	A	B	A	B	A	B	A	A	B	B	NA	NA	B	A	B	A	A	NA	A	B	A	A	A	A	A	A	B	B	B	A	B	A	A	A
226	B	B	B	B	B	A	A	A	A	B	B	B	B	B	B	A	B	A	B	A	B	A	A	NA	B	NA	NA	B	A	B	A	A	NA	A	B	A	A	A	A	A	A	B	B	NA	NA	B	NA	NA	NA
227	B	B	B	B	B	A	A	A	A	B	B	B	B	B	B	A	B	A	B	A	B	A	A	NA	B	NA	NA	B	A	B	A	A	B	A	B	A	A	A	A	A	A	B	NA	B	A	B	A	A	A
228	A	A	A	A	A	A	A	A	NA	A	A	A	A	A	A	NA	A	NA	A	NA	A	NA	NA	NA	A	NA	NA	A	B	A	B	B	NA	B	A	A	A	A	B	A	A	NA	NA	A	A	NA	B	NA	NA
229	B	B	B	B	B	A	A	A	A	B	B	B	B	B	B	A	B	A	B	A	B	A	A	B	B	NA	NA	B	A	B	A	A	B	A	B	A	A	A	A	A	A	B	NA	B	A	B	A	NA	NA
230	A	A	A	A	A	A	A	A	NA	A	A	A	A	A	A	NA	A	NA	A	NA	A	NA	NA	NA	A	NA	NA	A	B	A	B	B	NA	B	A	A	A	A	B	A	A	NA	NA	NA	NA	NA	B	NA	NA
231	A	A	A	A	A	A	A	A	NA	A	A	A	A	A	A	A	B	A	B	A	B	NA	NA	NA	B	NA	NA	B	A	B	A	A	B	A	B	A	A	A	A	A	A	B	B	B	A	B	A	A	A
232	B	B	B	B	B	A	A	A	A	B	B	B	B	B	B	A	NA	A	NA	A	NA	A	A	NA	B	NA	NA	B	A	B	A	A	B	A	B	A	A	A	A	A	A	B	NA	NA	NA	NA	A	A	A
233	B	B	B	B	B	A	A	A	A	B	B	B	B	B	B	A	B	A	B	A	B	NA	NA	NA	B	NA	NA	B	A	B	A	A	NA	A	B	A	A	A	A	A	A	B	NA	B	A	NA	A	NA	NA
234	A	A	A	A	A	A	A	A	NA	A	A	A	A	A	A	NA	A	NA	A	NA	A	NA	NA	NA	A	NA	NA	A	B	A	B	B	NA	B	A	A	A	A	B	A	A	NA	NA	A	A	NA	B	A	A
235	A	A	A	A	A	A	A	A	NA	A	A	A	A	A	A	NA	A	NA	A	NA	A	NA	NA	NA	A	NA	NA	A	B	A	B	B	NA	B	A	A	A	A	B	A	A	NA	A	A	A	NA	B	NA	NA
236	B	B	B	B	B	A	A	A	A	B	B	B	B	B	B	A	B	A	B	A	B	A	A	B	B	NA	NA	B	A	B	A	A	B	A	B	A	A	A	A	A	A	B	B	B	A	NA	B	A	A
237	A	A	A	A	A	A	A	A	NA	A	A	A	A	A	A	NA	A	NA	A	NA	A	A	A	A	A	NA	NA	A	B	A	B	B	A	B	A	A	A	A	B	A	A	NA	A	A	A	NA	B	A	A
238	A	A	A	A	A	A	A	A	NA	A	A	A	A	A	A	NA	A	NA	A	NA	A	NA	NA	A	A	NA	NA	A	B	A	B	B	NA	B	A	A	A	A	B	A	A	NA	NA	A	A	NA	B	A	A
239	A	A	A	A	A	A	A	A	NA	A	A	A	A	A	A	NA	A	NA	A	NA	A	NA	NA	NA	A	NA	NA	A	B	A	B	B	NA	B	A	A	A	A	B	A	A	NA	NA	NA	NA	NA	B	A	A
240	A	A	A	A	A	A	A	A	NA	A	A	A	A	A	A	NA	A	NA	A	NA	A	A	A	NA	A	NA	NA	A	B	A	B	B	NA	B	A	A	A	A	B	A	A	NA	NA	A	A	B	A	A	A
241	A	A	A	A	A	A	A	A	NA	A	A	A	A	A	A	NA	A	NA	A	NA	A	NA	NA	NA	A	NA	NA	A	B	A	B	B	NA	B	A	A	A	A	B	A	A	NA	NA	A	A	NA	B	NA	NA
242	A	A	A	A	A	A	A	A	B	A	A	A	A	A	A	B	A	B	A	B	A	A	A	A	A	NA	NA	A	B	A	B	B	A	B	A	A	A	A	B	A	A	B	A	A	A	NA	B	A	A
243	B	B	B	B	B	A	A	A	A	B	B	B	B	B	B	A	B	A	B	A	B	NA	NA	NA	B	NA	NA	B	A	B	A	A	NA	A	B	A	A	A	A	A	A	B	NA	NA	NA	NA	A	A	A
244	NA	NA	NA	NA	NA	A	A	A	NA	A	A	A	A	A	A	A	NA	A	NA	A	NA	NA	NA	NA	B	NA	NA	NA	A	NA	A	A	NA	A	B	A	A	A	A	A	A	B	NA	B	A	NA	A	NA	NA
245	A	A	A	A	A	A	A	A	NA	A	A	A	A	A	A	NA	A	NA	A	NA	A	NA	NA	NA	A	NA	NA	A	B	A	B	B	NA	B	A	A	A	A	B	A	A	NA	NA	NA	NA	NA	B	NA	NA
246	B	B	B	B	B	A	A	A	A	B	B	B	B	B	B	A	B	A	B	A	B	A	A	NA	B	NA	NA	B	A	B	A	A	NA	A	B	A	A	A	A	A	A	B	NA	B	A	B	A	A	A
247	B	B	B	B	B	A	A	A	A	B	B	B	B	B	B	A	B	A	B	A	B	A	A	B	B	NA	NA	B	A	B	A	A	B	A	B	A	A	A	A	A	A	B	NA	B	A	B	A	A	A
248	B	B	B	B	B	A	A	A	A	B	B	B	B	B	B	A	B	A	B	A	B	NA	NA	NA	B	NA	NA	B	A	B	A	A	NA	A	B	A	A	A	A	A	A	B	NA	NA	NA	B	A	A	A
249	A	A	A	A	A	A	A	A	NA	A	A	A	A	A	A	NA	A	NA	A	NA	A	NA	NA	NA	A	NA	NA	A	B	A	B	B	NA	B	A	A	A	A	B	A	A	NA	NA	A	A	NA	B	NA	NA
250	A	A	A	A	A	A	A	A	NA	A	A	A	A	A	A	NA	A	NA	A	NA	A	A	A	NA	A	NA	NA	A	B	A	B	B	A	B	A	A	A	A	B	A	A	NA	A	A	A	NA	B	A	A
251	A	A	A	A	A	A	A	A	NA	A	A	A	A	A	A	B	A	B	A	B	A	NA	NA	A	A	NA	NA	A	B	A	B	B	A	B	A	A	A	A	B	A	A	NA	A	A	A	NA	B	A	A
252	A	A	A	A	A	A	A	A	NA	A	A	A	A	A	A	NA	A	NA	A	NA	A	NA	NA	NA	A	NA	NA	A	B	A	B	B	NA	B	A	A	A	A	B	A	A	NA	NA	NA	NA	NA	NA	NA	NA
253	A	A	A	A	A	A	A	A	NA	A	A	A	A	A	A	B	A	B	A	B	A	NA	NA	A	A	NA	NA	A	B	A	B	B	A	B	A	A	A	A	B	A	A	NA	A	A	A	NA	B	A	A
254	B	B	B	B	B	A	A	A	A	B	B	B	B	B	B	A	B	A	B	A	B	NA	NA	NA	B	NA	NA	B	A	B	A	A	B	A	B	A	A	A	A	A	A	B	NA	B	A	B	A	A	A
255	A	A	A	A	A	A	A	A	NA	A	A	A	A	A	A	NA	A	NA	A	NA	A	A	A	NA	A	NA	NA	A	B	A	B	B	NA	B	A	A	A	A	B	A	A	NA	A	A	A	NA	B	A	A
256	B	B	B	B	B	A	A	A	NA	NA	NA	NA	NA	NA	NA	A	NA	A	NA	A	NA	NA	NA	NA	B	NA	NA	B	A	NA	A	A	NA	A	B	A	A	A	A	A	A	B	NA	B	A	NA	A	NA	NA
257	B	B	B	B	B	A	A	A	A	B	B	B	B	B	B	A	B	A	B	A	B	NA	NA	NA	B	NA	NA	B	A	B	A	A	NA	A	B	A	A	A	A	A	A	B	NA	NA	NA	NA	A	A	A
258	A	A	A	A	A	A	A	A	NA	A	A	A	A	A	A	NA	A	NA	A	NA	A	NA	NA	A	A	NA	NA	A	B	A	B	B	NA	B	A	A	A	A	B	A	A	NA	NA	A	A	NA	B	A	A
259	A	A	A	A	A	A	A	A	B	A	A	A	A	A	A	NA	A	NA	A	NA	A	A	A	A	A	NA	NA	A	B	A	B	B	A	B	A	A	A	A	B	A	A	NA	A	NA	NA	NA	B	A	A
260	B	B	B	B	B	A	A	A	A	B	B	B	B	B	B	A	B	A	B	A	B	NA	NA	NA	B	NA	NA	B	A	B	A	A	NA	A	B	A	A	A	A	A	A	B	NA	B	A	NA	A	A	A
261	B	B	B	B	B	A	A	A	A	B	B	B	B	B	B	A	B	A	B	A	B	NA	NA	B	B	NA	NA	B	A	B	A	A	B	A	B	A	A	A	A	A	A	B	NA	B	A	NA	A	NA	NA
262	B	B	B	B	B	A	A	A	A	B	B	B	B	B	B	A	B	A	B	A	B	A	A	B	B	NA	NA	B	A	B	A	A	B	A	A	A	A	A	B	A	A	NA	A	A	A	NA	B	A	A
263	A	A	A	A	A	A	A	A	NA	A	A	A	A	A	A	NA	A	NA	A	NA	A	NA	NA	NA	A	NA	NA	A	B	A	B	B	NA	B	A	A	A	A	B	A	A	NA	NA	A	A	NA	B	NA	NA
264	B	B	B	B	B	A	A	A	A	B	B	B	B	B	B	A	B	A	B	A	B	A	A	B	B	NA	NA	B	A	B	A	A	B	A	B	A	A	A	A	A	A	B	NA	B	A	B	A	NA	NA
265	B	B	B	B	B	A	A	A	A	B	B	B	B	B	B	A	B	A	B	A	B	A	A	B	B	NA	NA	B	A	B	A	A	B	A	B	A	A	A	A	A	A	B	B	B	A	B	A	A	A
266	B	B	B	B	B	A	A	A	NA	B	B	B	B	B	B	A	B	A	B	A	B	A	A	NA	B	NA	NA	B	A	B	A	A	B	A	B	A	A	A	A	A	A	B	B	B	A	B	A	A	A
267	A	A	A	A	A	A	A	A	B	A	A	A	A	A	A	NA	A	NA	A	NA	A	A	A	A	A	NA	NA	A	B	A	B	B	A	B	A	A	A	A	B	A	A	NA	A	A	A	NA	B	A	A
268	A	A	A	A	A	A	A	A	NA	A	A	A	A	A	A	NA	A	NA	A	NA	A	NA	NA	NA	A	NA	NA	A	B	A	B	B	NA	B	A	A	A	A	B	A	A	NA	NA	A	A	NA	B	A	A
269	B	B	B	B	B	A	A	A	A	B	B	B	B	B	B	A	B	A	B	A	B	A	A	B	B	NA	NA	B	A	B	A	A	B	A	B	A	A	A	A	A	A	B	B	B	A	B	A	A	A
270	A	A	A	A	A	A	A	A	NA	A	A	A	A	A	A	NA	A	NA	A	NA	A	A	A	NA	A	NA	NA	A	B	A	B	B	NA	B	A	A	A	A	B	A	A	NA	NA	NA	NA	NA	B	A	A
271	B	B	B	B	B	A	A	A	A	B	B	B	B	B	B	A	B	A	B	A	B	A	A	B	B	NA	NA	B	A	B	A	A	B	A	B	A	A	A	A	A	A	B	B	B	A	B	A	A	A
272	A	A	A	A	A	A	A	A	NA	A	A	A	A	A	A	NA	A	NA	A	NA	A	NA	NA	NA	A	NA	NA	A	B	A	B	B	NA	B	A	A	A	A	B	A	A	NA	NA	NA	NA	NA	NA	NA	NA
273	A	A	A	A	A	A	A	A	NA	A	A	A	A	A	A	NA	A	NA	A	NA	A	NA	NA	NA	A	NA	NA	A	B	A	B	B	NA	B	A	A	A	A	B	A	A	NA	NA	A	A	NA	B	A	A
274	B	B	B	B	B	A	A	A	NA	B	B	B	B	B	B	A	B	A	B	A	B	NA	NA	NA	B	NA	NA	B	A	NA	A	A	NA	A	B	A	A	A	A	A	A	B	NA	B	A	NA	A	NA	NA
275	B	B	B	B	B	A	A	A	A	B	B	B	B	B	B	A	B	A	B	A	B	A	A	B	B	NA	NA	B	A	B	A	A	B	A	B	A	A	A	A	A	A	B	NA	B	A	B	A	A	A
276	A	A	A	A	A	A	A	A	B	A	A	A	A	A	A	NA	A	NA	A	NA	A	NA	NA	A	A	NA	NA	A	B	A	B	B	A	B	A	A	A	A	B	A	A	NA	A	A	A	NA	B	A	A
277	B	B	B	B	B	A	A	A	NA	B	B	B	B	B	B	A	B	A	B	A	B	NA	NA	NA	B	NA	NA	B	A	B	A	A	NA	A	B	A	A	A	A	A	A	B	NA	B	A	NA	A	NA	NA
278	B	B	B	B	B	A	A	A	A	B	B	B	B	B	B	A	NA	A	NA	A	NA	A	A	B	B	NA	NA	B	A	B	A	A	B	A	B	A	A	A	B	A	A	NA	NA	A	A	NA	B	A	A
279	NA	NA	NA	NA	NA	A	A	A	NA	NA	NA	NA	NA	NA	NA	A	NA	A	NA	A	NA	NA	NA	NA	B	NA	NA	B	A	NA	A	A	NA	A	B	A	A	A	A	A	A	B	NA	NA	NA	NA	A	NA	NA
280	B	B	B	B	B	A	A	A	NA	B	B	B	B	B	B	A	B	A	B	A	B	A	A	NA	B	NA	NA	B	A	NA	A	A	NA	A	B	A	A	A	A	A	A	NA	NA	B	A	NA	A	A	A
281	A	A	A	A	A	A	A	A	NA	A	A	A	A	A	A	NA	A	NA	A	NA	A	A	A	NA	A	NA	NA	A	B	A	B	B	NA	B	A	A	A	A	B	A	A	NA	NA	A	A	NA	B	A	A
282	B	B	B	B	B	A	A	A	NA	B	B	B	B	B	B	A	B	A	B	A	B	A	A	B	B	NA	NA	B	A	B	A	A	NA	A	B	A	A	A	A	A	A	B	NA	B	A	B	A	NA	NA
283	A	A	A	A	A	A	A	A	NA	A	A	A	A	A	A	NA	A	NA	A	NA	A	A	A	NA	A	NA	NA	A	B	A	B	B	NA	B	A	A	A	A	B	A	A	NA	NA	NA	NA	NA	NA	NA	NA
284	B	B	B	B	B	A	A	A	A	B	B	B	B	B	B	A	NA	A	NA	A	NA	A	A	NA	B	NA	NA	B	A	B	A	A	NA	A	B	A	A	A	B	A	A	NA	NA	NA	NA	NA	NA	NA	NA
285	B	B	B	B	B	A	A	A	NA	B	B	B	B	B	B	A	B	A	B	A	B	NA	NA	NA	B	NA	NA	B	A	B	A	A	NA	A	B	A	A	A	A	A	A	NA	B	NA	NA	B	A	A	A
286	B	B	B	B	B	A	A	A	NA	B	B	B	B	B	B	A	NA	A	NA	A	NA	NA	NA	NA	B	NA	NA	B	A	B	A	A	NA	A	B	A	A	A	A	A	A	B	NA	NA	NA	NA	A	NA	NA
287	A	A	A	A	A	A	A	A	NA	A	A	A	A	A	A	NA	A	NA	A	NA	A	A	A	NA	A	NA	NA	A	B	A	B	B	NA	B	A	A	A	A	B	A	A	NA	NA	A	A	NA	B	NA	NA
288	B	B	B	B	B	A	A	A	A	B	B	B	B	B	B	A	B	A	B	A	B	A	A	B	B	NA	NA	B	A	B	A	A	B	A	B	A	A	A	A	A	A	B	B	B	A	B	A	A	A
289	B	B	B	B	B	A	A	A	A	B	B	B	B	B	B	A	NA	A	NA	A	NA	NA	NA	NA	B	NA	NA	B	A	B	A	A	NA	A	B	A	A	A	A	A	A	B	NA	B	A	NA	A	NA	NA
290	B	B	B	B	B	A	A	A	NA	B	B	B	B	B	B	A	B	A	B	A	B	NA	NA	NA	B	NA	NA	B	A	B	A	A	NA	A	B	A	A	A	A	A	A	B	NA	B	A	NA	A	NA	NA
291	A	A	A	A	A	A	A	A	NA	A	A	A	A	A	A	NA	A	NA	A	NA	A	A	A	NA	A	NA	NA	A	B	A	B	B	NA	B	A	A	A	A	B	A	A	NA	A	A	A	NA	B	A	A
292	A	A	A	A	A	A	A	A	NA	A	A	A	A	A	A	NA	A	NA	A	NA	A	NA	NA	NA	A	NA	NA	A	B	A	B	B	NA	B	A	A	A	A	B	A	A	NA	NA	A	A	NA	B	NA	NA
293	A	A	A	A	A	A	A	A	NA	A	A	A	A	A	A	NA	A	NA	A	NA	A	NA	NA	NA	A	NA	NA	A	B	A	B	B	NA	B	A	A	A	A	B	A	A	NA	NA	A	A	NA	B	A	A
294	NA	NA	NA	NA	NA	A	A	A	NA	A	A	A	A	A	A	NA	A	NA	A	NA	A	NA	NA	NA	A	NA	NA	A	B	NA	B	B	NA	B	A	A	A	A	NA	A	A	NA	NA	NA	NA	NA	B	NA	NA
295	B	B	B	B	B	A	A	A	A	B	B	B	B	B	B	A	B	A	B	A	B	A	A	B	B	NA	NA	B	A	B	A	A	B	A	B	A	A	A	A	A	A	B	B	B	A	B	A	A	A
296	A	A	A	A	A	A	A	A	NA	A	A	A	A	A	A	NA	A	NA	A	NA	A	A	A	A	A	NA	NA	A	B	A	B	B	A	B	A	A	A	A	B	A	A	NA	A	A	A	NA	B	A	A
297	A	A	A	A	A	A	A	A	NA	A	A	A	A	A	A	NA	A	NA	A	NA	A	A	A	A	A	NA	NA	A	B	A	B	B	NA	B	A	A	A	A	B	A	A	NA	A	A	A	NA	B	A	A
298	B	B	B	B	B	A	A	A	A	B	B	B	B	B	B	A	NA	A	NA	A	NA	A	A	NA	B	NA	NA	B	A	B	A	A	NA	A	B	A	A	A	A	A	A	B	NA	B	A	B	A	NA	NA
299	A	A	A	A	A	A	A	A	B	A	A	A	A	A	A	NA	A	NA	A	NA	A	NA	NA	NA	A	NA	NA	A	B	A	B	B	A	B	A	A	A	A	B	A	A	NA	A	A	A	NA	B	A	A
300	A	A	A	A	A	NA	NA	NA	NA	A	A	A	A	A	A	NA	A	NA	A	NA	A	NA	NA	NA	A	NA	NA	A	NA	A	NA	NA	NA	NA	A	NA	NA	NA	NA	NA	NA	NA	NA	NA	NA	NA	NA	NA	NA
301	B	B	B	B	B	A	A	A	NA	B	B	B	B	B	B	A	B	A	B	A	B	A	A	NA	B	NA	NA	B	A	B	A	A	B	A	B	A	A	A	A	A	A	B	NA	NA	NA	B	NA	A	A
302	A	A	A	A	A	A	A	A	NA	A	A	A	A	A	A	NA	A	NA	A	NA	A	NA	NA	NA	A	NA	NA	A	B	A	B	B	A	B	A	A	A	A	B	A	A	NA	NA	A	A	NA	B	A	A
303	A	A	A	A	A	A	A	A	NA	A	A	A	A	A	A	NA	A	NA	A	NA	A	NA	NA	NA	A	NA	NA	A	B	A	B	B	NA	B	A	A	A	A	B	A	A	NA	NA	A	A	NA	B	NA	NA
304	A	A	A	A	A	A	A	A	NA	A	A	A	A	A	A	NA	A	NA	A	NA	A	NA	NA	NA	A	NA	NA	A	B	A	B	B	NA	B	A	A	A	A	B	A	A	NA	NA	A	A	NA	B	NA	NA
305	A	A	A	A	A	A	A	A	NA	A	A	A	A	A	A	NA	A	NA	A	NA	A	A	A	NA	A	NA	NA	A	B	A	B	B	A	B	A	A	A	A	B	A	A	NA	A	A	A	NA	B	A	A
306	B	B	B	B	B	A	A	A	A	B	B	B	B	B	B	A	B	A	B	A	B	A	A	B	B	NA	NA	B	A	B	A	A	B	A	B	A	A	A	A	A	A	B	B	B	A	B	A	A	A
307	A	A	A	A	A	A	A	A	NA	A	A	A	A	A	A	NA	A	NA	A	NA	A	NA	NA	NA	A	NA	NA	A	B	A	B	B	NA	B	A	A	A	A	B	A	A	A	NA	NA	NA	NA	B	NA	NA
308	A	A	A	A	A	A	A	A	B	A	A	A	A	A	A	B	A	B	A	B	A	A	A	NA	A	NA	NA	A	B	A	B	B	A	B	A	A	A	A	B	A	A	NA	NA	A	A	NA	B	A	A
309	B	B	B	B	B	A	A	A	A	B	B	B	B	B	B	A	B	A	B	A	B	A	A	B	B	NA	NA	B	A	B	A	A	B	A	B	A	A	A	A	A	A	B	NA	NA	NA	NA	A	A	A
310	B	B	B	B	B	A	A	A	A	B	B	B	B	B	B	A	B	A	B	A	B	A	A	B	B	NA	NA	B	A	B	A	A	NA	A	B	A	A	A	A	A	A	B	NA	B	A	B	A	A	A
311	B	B	B	B	B	A	A	A	NA	NA	NA	NA	NA	NA	NA	A	NA	A	NA	A	NA	NA	NA	NA	B	NA	NA	NA	NA	NA	A	A	NA	A	B	A	A	A	A	A	A	B	NA	B	A	NA	A	NA	NA
312	A	A	A	A	A	A	A	A	NA	A	A	A	A	A	A	B	A	B	A	B	A	A	A	A	B	NA	NA	B	A	B	A	A	B	A	B	A	A	A	A	A	A	B	B	B	A	B	A	A	A
313	A	A	A	A	A	A	A	A	B	A	A	A	A	A	A	B	A	B	A	B	A	A	A	A	A	NA	NA	A	B	A	B	B	A	B	A	A	A	A	B	A	A	NA	A	A	A	NA	B	A	A
314	A	A	A	A	A	A	A	A	NA	A	A	A	A	A	A	B	A	B	A	B	A	A	A	A	A	NA	NA	A	B	A	B	B	A	B	A	A	A	A	B	A	A	NA	A	A	A	NA	B	A	A
315	A	A	A	A	A	A	A	A	NA	A	A	A	A	A	A	NA	A	NA	A	NA	A	NA	NA	NA	A	NA	NA	A	B	A	B	B	NA	B	A	A	A	A	B	A	A	NA	NA	NA	NA	NA	NA	NA	NA
316	B	B	B	B	B	A	A	A	A	B	B	B	B	B	B	A	B	A	B	A	B	A	A	B	B	NA	NA	B	A	B	A	A	B	A	B	A	A	A	A	A	A	B	B	B	A	B	A	A	A
317	B	B	B	B	B	A	A	A	A	B	B	B	B	B	B	A	B	A	B	A	B	A	A	B	B	NA	NA	B	A	B	A	A	B	A	B	A	A	A	A	A	A	B	B	B	A	B	A	A	A
318	A	A	A	A	A	A	A	A	NA	A	A	A	A	A	A	NA	A	NA	A	NA	A	NA	NA	NA	A	NA	NA	A	B	A	B	B	NA	B	A	A	A	A	B	A	A	NA	NA	A	A	NA	B	A	NA
319	A	A	A	A	A	A	A	A	NA	A	A	A	A	A	A	NA	A	NA	A	NA	A	NA	NA	NA	A	NA	NA	A	B	A	B	B	NA	B	A	A	A	A	B	A	A	NA	NA	A	A	NA	B	NA	NA
320	B	B	B	B	B	A	A	A	NA	B	B	B	B	B	B	A	B	A	B	A	B	NA	NA	NA	B	NA	NA	B	A	B	A	A	NA	A	B	A	A	A	A	A	A	B	NA	NA	NA	NA	A	NA	NA
321	A	A	A	A	A	A	A	A	NA	A	A	A	A	A	A	B	A	B	A	B	A	A	A	A	A	NA	NA	A	B	A	B	B	A	B	A	A	A	A	B	A	A	NA	A	A	A	NA	B	A	A
322	A	A	A	A	A	A	A	A	NA	A	A	A	A	A	A	NA	A	NA	A	NA	A	A	A	NA	A	NA	NA	A	B	A	B	B	A	B	A	A	A	A	B	A	A	NA	A	NA	NA	NA	B	A	A
323	A	A	A	A	A	A	A	A	NA	A	A	A	A	A	A	NA	A	NA	A	NA	A	NA	NA	NA	A	NA	NA	A	B	A	B	B	NA	B	A	A	A	A	B	A	A	NA	NA	A	A	NA	B	A	A
324	NA	NA	NA	NA	NA	A	A	A	NA	A	A	A	A	A	A	NA	A	NA	A	NA	A	NA	NA	NA	A	NA	NA	A	B	NA	B	B	NA	B	A	A	A	A	B	A	A	NA	NA	NA	NA	NA	NA	NA	NA
325	B	B	B	B	B	A	A	A	NA	B	B	B	B	B	B	A	B	A	B	A	B	NA	NA	NA	B	NA	NA	B	A	B	A	A	B	A	B	A	A	A	A	A	A	B	NA	NA	NA	B	A	A	A
326	A	A	A	A	A	A	A	A	NA	A	A	A	A	A	A	NA	A	NA	A	NA	A	NA	NA	NA	A	NA	NA	A	B	A	B	B	NA	B	A	A	A	A	A	A	A	B	NA	B	A	NA	A	NA	NA
327	B	B	B	B	B	A	A	A	NA	B	B	NA	B	B	B	A	NA	A	NA	A	NA	NA	NA	NA	B	NA	NA	B	A	B	A	A	NA	A	B	A	A	A	A	A	A	NA	NA	NA	NA	NA	NA	NA	NA
328	B	B	B	B	B	A	A	A	A	B	B	B	B	B	B	A	B	A	B	A	B	NA	NA	B	B	NA	NA	B	A	B	A	A	B	A	B	A	A	A	A	A	A	B	B	B	A	B	A	A	A
329	A	A	A	A	A	A	A	A	NA	A	A	A	A	A	A	NA	A	NA	A	NA	A	A	A	NA	A	NA	NA	A	B	A	B	B	A	B	A	A	A	A	B	A	A	NA	A	NA	NA	NA	B	A	A
330	B	B	B	B	B	A	A	A	A	B	B	B	B	B	B	A	NA	A	NA	A	NA	NA	NA	NA	B	NA	NA	B	A	B	A	A	NA	A	B	A	A	A	A	A	A	B	NA	B	A	NA	A	NA	NA
331	B	B	B	B	B	A	A	A	A	B	B	B	B	B	B	A	B	A	B	A	B	NA	NA	NA	B	NA	NA	B	A	B	A	A	NA	A	B	A	A	A	A	A	A	B	NA	B	A	B	A	A	A
332	A	A	A	A	A	A	A	A	NA	A	A	A	A	A	A	NA	A	NA	A	NA	A	NA	NA	NA	A	NA	NA	A	B	A	B	B	NA	B	A	A	A	A	B	A	A	NA	NA	A	A	NA	B	NA	NA
333	A	A	A	A	A	A	A	A	NA	A	A	A	A	A	A	NA	A	NA	A	NA	A	A	A	NA	A	NA	NA	A	B	A	B	B	NA	B	A	A	A	A	B	A	A	NA	NA	A	A	NA	NA	A	A
334	B	B	B	B	B	A	A	A	NA	B	B	B	B	B	B	A	NA	A	NA	A	NA	NA	NA	NA	B	NA	NA	A	B	A	B	B	NA	B	A	A	A	A	B	A	A	NA	NA	A	A	NA	B	A	A
335	A	A	A	A	A	A	A	A	NA	A	A	A	A	A	A	NA	A	NA	A	NA	A	NA	NA	NA	A	NA	NA	A	B	A	B	B	NA	B	A	A	A	A	B	A	A	NA	NA	A	A	NA	B	NA	NA
336	A	A	A	A	A	A	A	A	NA	A	A	A	A	A	A	NA	A	NA	A	NA	A	A	A	NA	A	NA	NA	A	B	A	B	B	A	B	A	A	A	A	B	A	A	NA	NA	NA	NA	NA	B	NA	NA
337	B	B	B	B	B	A	A	A	A	B	B	B	B	B	B	A	B	A	B	A	B	A	A	NA	B	NA	NA	B	A	B	A	A	NA	A	B	A	A	A	A	A	A	B	NA	B	A	B	A	A	A
338	A	A	A	A	A	A	A	A	NA	A	A	A	A	A	A	NA	A	NA	A	NA	A	A	A	A	A	NA	NA	A	B	A	B	B	A	B	A	A	A	A	B	A	A	NA	A	NA	NA	NA	B	A	A
339	B	B	B	B	B	A	A	A	A	B	B	B	B	B	B	A	B	A	B	A	B	NA	NA	NA	B	NA	NA	B	A	B	A	A	NA	A	B	A	A	A	A	A	A	NA	NA	NA	NA	NA	NA	NA	NA
340	A	A	A	A	A	A	A	A	NA	A	A	A	A	A	A	NA	A	NA	A	NA	A	NA	NA	NA	A	NA	NA	A	B	A	B	B	NA	B	A	A	A	A	B	A	A	NA	NA	A	A	NA	B	NA	NA
341	B	B	B	B	B	A	A	A	NA	B	B	B	B	B	B	A	B	A	B	A	NA	NA	NA	NA	B	NA	NA	B	A	NA	A	A	NA	A	B	A	A	A	A	A	A	B	NA	B	A	NA	A	NA	NA
342	B	B	B	B	B	A	A	A	A	B	B	B	B	B	B	A	B	A	B	A	B	NA	NA	NA	B	NA	NA	B	A	B	A	A	NA	A	B	A	A	A	A	A	A	B	NA	B	A	B	A	NA	NA
343	B	B	B	B	B	A	A	A	A	B	B	B	B	B	B	A	NA	A	B	A	B	A	A	NA	B	NA	NA	B	A	B	A	A	B	A	B	A	A	A	A	A	A	B	NA	B	A	B	A	NA	NA
344	B	B	B	B	B	A	A	A	A	B	B	B	B	B	B	A	B	A	B	A	B	NA	NA	NA	B	NA	NA	B	A	B	A	A	NA	A	B	A	A	A	A	A	A	B	B	NA	NA	B	A	NA	NA
345	A	A	A	A	A	A	A	A	NA	A	A	A	A	A	A	NA	A	NA	A	NA	A	A	A	A	A	NA	NA	A	B	A	B	B	A	B	A	A	A	A	A	A	A	B	B	B	A	B	A	A	A
346	A	A	A	A	A	A	A	A	NA	A	A	A	A	A	A	NA	A	NA	A	NA	A	NA	NA	NA	A	NA	NA	A	B	A	B	B	NA	B	A	A	A	A	B	A	A	NA	NA	A	A	NA	B	A	A
347	A	A	A	A	A	A	A	A	NA	A	A	A	A	A	A	NA	A	NA	A	NA	A	NA	NA	A	A	NA	NA	A	B	A	B	B	NA	B	A	A	A	A	B	A	A	NA	A	A	A	NA	B	A	A
348	B	B	B	B	B	A	A	A	NA	B	B	B	B	B	B	A	B	A	B	A	B	NA	NA	NA	B	NA	NA	B	A	B	A	A	NA	A	B	A	A	A	A	A	A	B	NA	B	A	NA	A	NA	NA
349	A	A	A	A	A	A	A	A	NA	A	A	A	A	A	A	NA	A	NA	A	NA	A	A	A	NA	A	NA	NA	A	B	A	B	B	NA	B	A	A	A	A	B	A	A	NA	NA	A	A	NA	B	A	A
350	B	B	B	B	B	A	A	A	NA	NA	NA	NA	NA	NA	NA	A	NA	A	NA	A	NA	NA	NA	NA	B	NA	NA	B	A	NA	A	A	NA	A	B	A	A	A	NA	A	A	B	NA	B	A	NA	A	NA	NA
351	B	B	B	B	B	A	A	A	A	B	B	B	B	B	B	A	B	A	B	A	B	A	A	NA	B	NA	NA	B	A	B	A	A	B	A	B	A	A	A	B	A	A	NA	A	NA	NA	NA	NA	A	A
352	A	A	A	A	A	A	A	A	NA	A	A	A	A	A	A	NA	A	NA	A	NA	A	A	A	NA	A	NA	NA	A	B	A	B	B	NA	B	A	A	A	A	B	A	A	NA	A	A	A	NA	B	A	A
353	B	B	B	B	B	A	A	A	A	B	B	B	B	B	B	A	B	A	B	A	B	NA	NA	NA	B	NA	NA	B	A	B	A	A	B	A	B	A	A	A	A	A	A	B	B	B	A	B	A	A	A
[truncated: 5,000 more columns]

## Sheet: Family10
Index	S1-P8299	S1-P8319	S1-P8326	S1-P8339	S1-P8376	S1-P71772	S1-P71802	S1-P79917	S1-P131422	S1-P135507	S1-P135515	S1-P135523	S1-P135525	S1-P135554	S1-P135567	S1-P218095	S1-P218095	S1-P218116	S1-P218116	S1-P218122	S1-P218122	S1-P221910	S1-P221912	S1-P222734	S1-P263186	S1-P275717	S1-P275719	S1-P289012	S1-P289026	S1-P320998	S1-P342018	S1-P342021	S1-P354958	S1-P381154	S1-P390152	S1-P607732	S1-P607747	S1-P607753	S1-P634729	S1-P778957	S1-P779017	S1-P822501	S1-P841680	S1-P845653	S1-P845685	S1-P906467	S1-P950743	S1-P972596	S1-P972666
	1	1	1	1	1	1	1	1	1	1	1	1	1	1	1	1	1	1	1	1	1	1	1	1	1	1	1	1	1	1	1	1	1	1	1	1	1	1	1	1	1	1	1	1	1	1	1	1	1
0	A	A	A	A	A	A	A	A	NA	NA	NA	NA	NA	NA	NA	NA	A	NA	A	NA	A	NA	NA	NA	A	NA	NA	A	B	A	B	B	NA	B	A	A	A	A	B	A	A	NA	NA	A	B	NA	B	NA	NA
1	A	A	A	A	A	B	B	B	NA	A	A	A	A	A	A	NA	NA	NA	NA	NA	NA	NA	NA	NA	A	NA	NA	A	A	NA	A	A	NA	A	NA	B	B	B	A	B	B	A	NA	A	A	NA	A	NA	NA
2	A	A	A	A	A	B	B	B	A	A	A	A	A	A	A	A	NA	A	NA	A	NA	B	B	A	A	A	A	A	A	A	A	A	B	A	NA	B	B	B	A	B	B	A	NA	A	A	A	A	B	B
3	A	A	A	A	A	B	B	B	NA	A	A	A	A	A	A	A	NA	A	NA	A	NA	NA	NA	NA	A	A	A	A	A	A	A	A	NA	A	NA	B	B	B	A	B	B	A	NA	A	A	A	A	NA	NA
4	A	A	A	A	A	B	B	B	NA	A	A	A	A	A	A	NA	NA	NA	NA	NA	NA	NA	NA	NA	A	A	A	A	A	A	A	A	NA	A	NA	B	B	B	A	B	B	A	NA	A	A	NA	NA	NA	NA
5	A	A	A	A	A	B	B	B	A	A	A	A	A	A	A	A	NA	A	NA	A	NA	B	B	A	A	A	A	A	A	A	A	A	B	A	NA	B	B	B	A	B	B	A	NA	NA	NA	A	A	B	B
6	A	A	A	A	A	A	A	A	NA	A	A	A	A	A	A	NA	A	NA	A	NA	A	A	A	A	A	B	B	A	B	A	B	B	NA	B	A	A	A	A	B	A	A	NA	NA	A	B	NA	B	A	A
7	A	A	A	A	A	A	A	A	NA	A	A	A	A	A	A	B	A	B	A	B	A	NA	NA	A	A	B	B	A	B	A	B	B	NA	B	A	A	A	A	B	A	A	NA	NA	A	B	NA	B	A	A
8	A	A	A	A	A	B	B	B	A	A	A	A	A	A	A	A	NA	A	NA	A	NA	B	B	A	A	A	A	A	A	A	A	A	B	A	NA	B	B	B	A	B	B	A	A	A	A	A	A	B	B
9	A	A	A	A	A	B	B	B	NA	A	A	A	A	A	A	A	NA	A	NA	A	NA	B	B	NA	A	A	A	A	A	A	A	A	B	A	NA	B	B	B	A	B	B	A	NA	A	A	NA	A	B	B
10	A	A	A	A	A	A	A	A	NA	A	A	A	A	A	A	NA	A	NA	A	NA	A	NA	NA	NA	A	NA	NA	A	B	NA	B	B	NA	B	A	A	A	A	B	A	A	NA	NA	NA	NA	NA	B	NA	NA
11	A	A	A	A	A	B	B	B	A	A	A	A	A	A	A	A	NA	A	NA	A	NA	B	B	A	A	A	A	A	A	A	A	A	NA	A	NA	B	B	B	A	B	B	A	A	A	A	A	A	B	B
12	A	A	A	A	A	A	A	A	NA	A	A	A	A	A	A	NA	A	NA	A	NA	A	NA	NA	NA	A	NA	NA	A	B	A	B	B	NA	B	A	A	A	A	B	A	A	NA	NA	A	B	NA	B	A	A
13	A	A	A	A	A	A	A	A	NA	NA	NA	NA	NA	NA	NA	NA	A	NA	A	NA	A	NA	NA	NA	A	NA	NA	A	B	NA	B	B	NA	B	A	A	A	A	B	A	A	NA	NA	A	B	NA	B	NA	NA
14	A	A	A	A	A	B	B	B	A	A	A	A	A	A	A	A	NA	A	NA	A	NA	B	B	A	A	A	A	A	A	A	A	A	NA	A	NA	B	B	B	A	B	B	A	A	A	A	A	A	B	B
15	A	A	A	A	A	A	A	A	NA	A	A	A	A	A	A	NA	A	NA	A	NA	A	NA	NA	NA	A	NA	NA	A	B	NA	B	B	NA	B	A	A	A	A	B	A	A	NA	NA	A	B	NA	NA	A	A
16	A	A	A	A	A	B	B	B	NA	A	A	A	A	A	A	NA	NA	NA	NA	NA	NA	NA	NA	NA	A	NA	NA	A	A	A	A	A	NA	A	NA	B	B	B	A	B	B	A	NA	NA	NA	NA	A	B	B
17	A	A	A	A	A	B	B	B	A	A	A	A	A	A	A	A	NA	A	NA	A	NA	B	B	A	A	A	A	A	A	A	A	A	B	A	NA	B	B	B	A	B	B	A	NA	NA	NA	A	A	B	B
18	A	A	A	A	A	B	B	B	NA	A	A	A	A	A	A	A	NA	A	NA	A	NA	NA	NA	NA	A	A	A	A	A	A	A	A	NA	A	NA	B	B	B	A	B	B	A	NA	A	A	NA	A	NA	NA
19	A	A	A	A	A	A	A	A	NA	A	A	A	A	A	A	NA	A	NA	A	NA	A	NA	NA	A	A	B	B	A	B	A	B	B	NA	B	A	A	A	A	B	A	A	NA	NA	A	B	NA	B	A	A
20	A	A	A	A	A	A	A	A	NA	NA	NA	NA	NA	NA	NA	NA	A	NA	A	NA	A	NA	NA	NA	A	NA	NA	A	B	A	B	B	NA	B	A	A	A	A	NA	A	A	NA	NA	A	B	NA	B	NA	NA
21	A	A	A	A	A	A	A	A	NA	A	A	A	A	A	A	NA	A	NA	A	NA	A	NA	NA	A	A	NA	NA	A	B	A	B	B	NA	B	A	A	A	A	B	A	A	NA	NA	NA	NA	NA	B	NA	NA
22	A	A	A	A	A	B	B	B	A	A	A	A	A	A	A	A	B	A	B	A	B	B	B	A	A	A	A	A	A	A	A	A	B	A	NA	B	B	B	A	B	B	A	NA	A	A	A	A	B	B
23	A	A	A	A	A	B	B	B	A	A	A	A	A	A	A	A	NA	A	NA	A	NA	B	B	A	A	A	A	A	A	A	A	A	NA	A	NA	B	B	B	A	B	B	A	NA	A	A	A	A	B	B
24	A	A	A	A	A	NA	NA	B	NA	A	A	A	A	A	A	NA	NA	NA	NA	NA	NA	NA	NA	NA	A	NA	NA	A	A	A	A	A	B	A	NA	B	B	B	A	B	B	NA	A	NA	NA	NA	NA	NA	NA
25	A	A	A	A	A	A	A	A	B	A	A	A	A	A	A	NA	A	NA	A	NA	A	NA	NA	NA	A	B	B	A	B	A	B	B	A	B	A	A	A	A	B	A	A	NA	A	A	B	NA	B	A	A
26	A	A	A	A	A	B	B	B	A	A	A	A	A	A	A	A	NA	A	NA	A	NA	NA	NA	NA	A	A	A	A	A	A	A	A	NA	A	NA	A	A	A	B	A	A	NA	NA	A	B	NA	NA	NA	NA
27	A	A	A	A	A	B	B	B	A	A	A	A	A	A	A	A	NA	A	NA	A	NA	B	B	NA	A	A	A	A	A	A	A	A	B	A	NA	B	B	B	A	B	B	NA	NA	NA	NA	A	NA	B	B
28	A	A	A	A	A	B	B	B	A	A	A	A	A	A	A	A	NA	A	NA	A	NA	NA	NA	NA	A	A	A	A	A	A	A	A	NA	A	NA	B	B	B	A	B	B	A	NA	A	A	A	A	B	B
29	A	A	A	A	A	B	B	B	A	A	A	A	A	A	A	A	NA	A	NA	A	NA	NA	NA	NA	A	A	A	A	A	A	A	A	NA	A	NA	B	B	B	A	B	B	A	NA	A	A	NA	A	NA	NA
30	A	A	A	A	A	A	A	A	NA	A	A	A	A	A	A	B	A	B	A	B	A	NA	NA	NA	A	NA	NA	A	B	A	B	B	NA	B	A	A	A	A	B	A	A	NA	NA	A	B	NA	B	A	A
31	A	A	A	A	A	A	A	A	NA	A	A	A	A	A	A	NA	A	NA	A	NA	A	A	A	NA	A	NA	NA	A	B	A	B	B	A	B	A	A	A	A	B	A	A	NA	NA	NA	NA	NA	NA	A	A
32	A	A	A	A	A	A	A	A	NA	A	A	A	A	A	A	NA	A	NA	A	NA	A	A	A	NA	A	B	B	A	B	A	B	B	NA	B	A	A	A	A	B	A	A	NA	NA	A	B	NA	B	A	A
33	A	A	A	A	A	B	B	B	A	A	A	A	A	A	A	A	NA	A	NA	A	NA	NA	NA	NA	A	A	A	A	A	A	A	A	B	A	NA	B	B	B	A	B	B	A	NA	A	A	A	A	B	B
34	A	A	A	A	A	A	A	A	NA	A	A	A	A	A	A	NA	A	NA	A	NA	A	NA	NA	NA	A	NA	NA	A	B	NA	B	B	NA	B	A	A	A	A	B	A	A	NA	NA	NA	NA	NA	NA	NA	NA
35	A	A	A	A	A	A	A	A	NA	A	A	A	A	A	A	NA	A	NA	A	NA	A	A	A	A	A	NA	NA	A	B	A	B	B	A	B	A	A	A	A	B	A	A	NA	A	A	B	NA	B	A	A
36	A	A	A	A	A	A	A	A	NA	A	A	A	A	A	A	NA	A	NA	A	NA	A	NA	NA	NA	A	B	B	A	B	A	B	B	NA	B	A	A	A	A	B	A	A	NA	NA	NA	NA	NA	NA	NA	NA
37	A	A	A	A	A	B	B	B	NA	A	A	A	A	A	A	A	NA	A	NA	A	NA	NA	NA	NA	A	A	A	A	A	A	A	A	NA	A	NA	B	B	B	A	B	B	A	NA	A	A	A	A	NA	NA
38	A	A	A	A	A	B	B	B	A	A	A	A	A	A	A	A	NA	A	NA	A	NA	B	B	A	A	A	A	A	A	A	A	A	B	A	NA	B	B	B	A	B	B	A	A	A	A	A	A	B	B
39	A	A	A	A	A	B	B	B	A	A	A	A	A	A	A	A	NA	A	NA	A	NA	NA	NA	A	A	A	A	A	A	A	A	A	NA	A	NA	B	B	B	A	B	B	A	A	A	A	A	NA	B	B
40	A	A	A	A	A	B	B	B	A	A	A	A	A	A	A	A	NA	A	NA	A	NA	B	B	A	A	A	A	A	A	A	A	A	B	A	NA	B	B	B	A	B	B	A	A	A	A	A	A	B	B
41	A	A	A	A	A	B	B	B	A	A	A	A	A	A	A	A	NA	A	NA	A	NA	B	B	A	A	A	A	A	A	A	A	A	B	A	NA	B	B	B	A	B	B	A	A	NA	NA	A	A	B	B
42	A	A	A	A	A	A	A	A	NA	A	A	A	A	A	A	NA	A	NA	A	NA	A	NA	NA	A	A	NA	NA	A	B	A	B	B	NA	B	A	A	A	A	B	A	A	NA	NA	NA	NA	NA	B	NA	NA
43	A	A	A	A	A	B	B	B	A	A	A	A	A	A	A	A	NA	A	NA	A	NA	B	B	A	A	A	A	A	A	A	A	A	NA	A	NA	B	B	B	A	B	B	A	A	A	A	A	A	B	B
44	A	A	A	A	A	A	A	A	NA	A	A	A	A	A	A	NA	A	NA	A	NA	A	NA	NA	NA	A	NA	NA	A	B	A	B	B	NA	B	A	A	A	A	B	A	A	NA	NA	NA	NA	NA	NA	A	A
45	A	A	A	A	A	A	A	A	NA	A	A	A	A	A	A	NA	A	NA	A	NA	A	NA	NA	NA	A	B	B	A	B	A	B	B	NA	B	A	A	A	A	B	A	A	NA	NA	NA	NA	NA	B	A	A
46	A	A	A	A	A	A	A	A	NA	A	A	A	A	A	A	NA	A	NA	A	NA	A	NA	NA	NA	A	NA	NA	A	B	A	B	B	NA	B	A	A	A	A	B	A	A	A	NA	A	A	NA	A	NA	NA
47	A	A	A	A	A	B	B	B	A	A	A	A	A	A	A	A	NA	A	NA	A	NA	B	B	NA	A	A	A	A	A	A	A	A	NA	A	NA	B	B	B	A	B	B	A	NA	A	A	A	A	B	B
48	A	A	A	A	A	A	A	A	NA	A	A	A	A	A	A	NA	A	NA	A	NA	A	NA	NA	NA	A	B	B	A	B	A	B	B	A	B	A	A	A	A	B	A	A	NA	NA	A	B	NA	B	NA	NA
49	A	A	A	A	A	B	B	B	A	A	A	A	A	A	A	NA	NA	NA	NA	NA	NA	NA	NA	NA	A	A	A	A	A	A	A	A	NA	A	NA	B	B	B	A	B	B	A	NA	NA	NA	A	NA	B	B
50	A	A	A	A	A	A	A	A	NA	A	A	A	A	A	A	NA	A	NA	A	NA	A	NA	NA	NA	A	NA	NA	A	B	A	B	B	NA	B	A	B	B	B	A	B	B	A	NA	NA	NA	NA	NA	B	B
51	A	A	A	A	A	A	A	A	NA	A	A	A	A	A	A	NA	A	NA	A	NA	A	A	A	A	A	B	B	A	B	A	B	B	A	B	A	A	A	A	B	A	A	NA	NA	A	B	NA	B	A	A
52	A	A	A	A	A	B	B	B	A	A	A	A	A	A	A	A	NA	A	NA	A	NA	B	B	NA	A	A	A	A	A	A	A	A	NA	A	NA	B	B	B	A	B	B	A	NA	NA	NA	A	A	B	B
53	A	A	A	A	A	B	B	B	A	A	A	A	A	A	A	A	NA	A	NA	A	NA	B	B	A	A	A	A	A	A	A	A	A	B	A	NA	B	B	B	A	B	B	A	A	A	A	A	A	B	B
54	A	A	A	A	A	A	A	A	NA	A	A	A	A	A	A	NA	A	NA	A	NA	A	NA	NA	A	A	B	B	A	B	A	B	B	A	B	A	A	A	A	B	A	A	NA	NA	NA	NA	NA	B	NA	NA
55	A	A	A	A	A	A	A	A	NA	A	A	A	A	A	A	NA	A	NA	A	NA	A	A	A	A	A	B	B	A	B	A	B	B	A	B	A	A	A	A	B	A	A	NA	A	A	B	NA	B	A	A
56	A	A	A	A	A	A	A	A	NA	A	A	A	A	A	A	B	A	B	A	B	A	NA	NA	NA	A	B	B	A	B	A	B	B	NA	B	A	A	A	A	B	A	A	NA	NA	A	B	NA	B	A	A
57	A	A	A	A	A	B	B	B	A	A	A	A	A	A	A	NA	NA	NA	NA	NA	NA	NA	NA	NA	A	A	A	A	A	A	A	A	B	A	NA	B	B	B	A	B	B	A	NA	A	A	A	A	B	B
58	A	A	A	A	A	B	B	B	A	A	A	A	A	A	A	A	NA	A	B	A	B	B	B	A	A	A	A	A	A	A	A	A	B	A	NA	B	B	B	A	B	B	A	A	A	A	A	A	B	B
59	A	A	A	A	A	B	B	B	NA	A	A	A	A	A	A	NA	NA	NA	NA	NA	NA	NA	NA	NA	A	A	A	A	A	A	A	A	NA	A	NA	B	B	B	A	B	B	A	NA	NA	NA	NA	NA	NA	NA
60	A	A	A	A	A	B	B	B	NA	A	A	A	A	A	A	A	NA	A	NA	A	NA	NA	NA	NA	A	A	A	A	A	A	A	A	NA	A	NA	B	B	B	A	B	B	NA	NA	NA	NA	NA	NA	B	B
61	A	A	A	A	A	A	A	A	NA	A	A	A	A	A	A	B	A	B	A	B	A	A	A	A	A	B	B	A	B	A	B	B	A	B	A	A	A	A	B	A	A	NA	A	A	B	NA	B	A	A
62	A	A	A	A	A	B	B	B	NA	A	A	A	A	A	A	NA	NA	NA	NA	NA	NA	NA	NA	NA	A	NA	NA	A	A	A	A	A	NA	A	NA	B	B	B	A	B	B	A	NA	A	A	NA	A	NA	NA
63	A	A	A	A	A	A	A	A	NA	A	A	A	A	A	A	NA	A	NA	A	NA	A	NA	NA	NA	A	NA	NA	A	B	NA	B	B	NA	B	A	A	A	A	B	A	A	NA	NA	A	B	NA	B	NA	NA
64	A	A	A	A	A	A	A	A	NA	A	A	A	A	A	A	NA	A	NA	A	NA	A	NA	NA	NA	A	NA	NA	A	B	NA	B	B	NA	B	A	A	A	A	NA	A	A	NA	NA	A	B	NA	B	NA	NA
65	A	A	A	A	A	A	A	A	NA	A	A	A	A	A	A	NA	A	NA	A	NA	A	NA	NA	NA	A	NA	NA	A	B	A	B	B	A	B	A	A	A	A	B	A	A	NA	NA	A	B	NA	B	A	A
66	A	A	A	A	A	B	B	B	A	A	A	A	A	A	A	A	NA	A	NA	A	NA	B	B	A	A	A	A	A	A	A	A	A	NA	A	NA	B	B	B	A	B	B	A	A	NA	NA	A	A	B	B
67	A	A	A	A	A	NA	NA	NA	NA	A	A	A	A	A	A	NA	A	NA	A	NA	A	NA	NA	NA	A	NA	NA	A	NA	A	NA	NA	NA	NA	A	NA	NA	NA	NA	NA	NA	NA	NA	NA	NA	NA	NA	NA	NA
68	A	A	A	A	A	A	A	A	B	A	A	A	A	A	A	B	A	B	A	B	A	A	A	NA	A	B	B	A	B	A	B	B	A	B	A	A	A	A	B	A	A	NA	A	A	B	NA	B	A	A
69	A	A	A	A	A	A	A	A	NA	A	A	A	A	A	A	NA	A	NA	A	NA	A	NA	NA	NA	A	NA	NA	A	B	A	B	B	NA	B	A	A	A	A	B	A	A	NA	NA	A	B	NA	B	NA	NA
70	A	A	A	A	A	B	B	B	A	A	A	A	A	A	A	A	NA	A	NA	A	NA	B	B	A	A	A	A	A	A	A	A	A	B	A	NA	B	B	B	A	B	B	A	A	A	A	NA	A	B	B
71	A	A	A	A	A	B	B	B	NA	A	A	A	A	A	A	A	NA	A	NA	A	NA	NA	NA	NA	A	A	A	A	A	A	A	A	NA	A	NA	B	B	B	A	B	B	A	NA	A	A	NA	A	B	B
72	A	A	A	A	A	A	A	A	NA	A	A	A	A	A	A	B	A	B	A	B	A	NA	NA	NA	A	B	B	A	B	A	B	B	NA	B	A	A	A	A	B	A	A	NA	NA	A	B	NA	B	A	A
[truncated: 5,000 more columns]

## Sheet: Family14
Index	S1-P8299	S1-P8319	S1-P8326	S1-P8339	S1-P8376	S1-P71772	S1-P71802	S1-P79917	S1-P131422	S1-P135507	S1-P135515	S1-P135523	S1-P135525	S1-P135554	S1-P135567	S1-P218095	S1-P218095	S1-P218116	S1-P218116	S1-P218122	S1-P218122	S1-P221910	S1-P221912	S1-P222734	S1-P263186	S1-P275717	S1-P275719	S1-P289012	S1-P289026	S1-P320998	S1-P342018	S1-P342021	S1-P354958	S1-P381154	S1-P390152	S1-P607732	S1-P607747	S1-P607753	S1-P634729	S1-P778957	S1-P779017	S1-P822501	S1-P841680	S1-P845653	S1-P845685	S1-P906467	S1-P950743	S1-P972596	S1-P972666
	1	1	1	1	1	1	1	1	1	1	1	1	1	1	1	1	1	1	1	1	1	1	1	1	1	1	1	1	1	1	1	1	1	1	1	1	1	1	1	1	1	1	1	1	1	1	1	1	1
73	A	A	A	A	A	B	B	B	A	A	A	A	A	A	A	A	NA	A	NA	A	NA	B	B	NA	A	NA	NA	A	A	A	A	A	NA	A	NA	B	B	B	A	B	B	A	NA	A	A	NA	A	B	B
74	A	A	A	A	A	B	B	B	A	A	A	A	A	A	A	A	NA	A	NA	A	NA	NA	NA	NA	A	A	A	A	A	A	A	A	NA	A	NA	B	B	B	A	B	B	A	NA	A	A	NA	A	B	B
75	A	A	A	A	A	B	B	B	A	A	A	A	A	A	A	A	NA	A	NA	A	NA	B	B	A	A	A	A	A	A	A	A	A	B	A	NA	B	B	B	A	B	B	A	A	A	A	A	A	B	B
76	A	A	A	A	A	A	A	A	NA	A	A	A	A	A	A	NA	A	NA	A	NA	A	A	A	A	A	NA	NA	A	B	A	B	B	A	B	NA	A	A	A	B	A	A	NA	A	A	A	NA	B	A	A
77	A	A	A	A	A	A	A	A	NA	A	A	A	A	A	A	B	A	B	A	B	A	A	A	A	A	NA	NA	A	B	A	B	B	A	B	NA	A	A	A	B	A	A	NA	A	A	A	NA	B	A	A
78	A	A	A	A	A	B	B	B	NA	A	A	A	A	A	A	NA	NA	NA	NA	NA	NA	NA	NA	NA	A	A	A	A	A	A	A	A	NA	A	NA	B	B	B	A	B	B	A	NA	A	A	A	A	B	B
79	A	A	A	A	A	B	B	B	NA	A	A	A	A	A	A	A	NA	A	NA	A	NA	NA	NA	NA	A	A	A	A	A	A	A	A	NA	A	NA	B	B	B	A	B	B	A	NA	A	A	A	A	B	B
80	A	A	A	A	A	A	A	A	NA	A	A	A	A	A	A	NA	A	NA	A	NA	A	NA	NA	NA	A	NA	NA	A	B	A	B	B	A	B	NA	A	A	A	B	A	A	NA	NA	A	A	NA	NA	A	A
81	A	A	A	A	A	B	B	B	A	A	A	A	A	A	A	A	NA	A	NA	A	NA	B	B	A	A	A	A	A	A	A	A	A	B	A	NA	B	B	B	A	B	B	A	A	A	A	A	A	B	B
82	A	A	A	A	A	A	A	A	NA	A	A	A	A	A	A	NA	A	NA	A	NA	A	A	A	A	A	NA	NA	A	B	A	B	B	A	B	NA	A	A	A	B	A	A	NA	A	A	A	NA	B	NA	NA
83	A	A	A	A	A	B	B	B	NA	A	A	A	A	A	A	NA	NA	NA	NA	NA	NA	NA	NA	NA	A	A	A	A	A	A	A	A	NA	A	NA	B	B	B	A	B	B	A	NA	NA	NA	NA	A	B	B
84	A	A	A	A	A	A	A	A	NA	A	A	A	A	A	A	NA	A	NA	A	NA	A	NA	NA	NA	A	NA	NA	A	B	A	B	B	NA	B	NA	A	A	A	B	A	A	NA	NA	NA	NA	NA	NA	NA	NA
85	A	A	A	A	A	B	B	B	A	A	A	A	A	A	A	A	NA	A	NA	A	NA	B	B	A	A	A	A	A	A	A	A	A	B	A	NA	B	B	B	A	B	B	A	A	A	A	A	A	B	B
86	A	A	A	A	A	A	A	A	NA	A	A	A	A	A	A	NA	A	NA	A	NA	A	A	A	A	A	NA	NA	A	B	A	B	B	A	B	NA	A	A	A	B	A	A	NA	A	A	A	NA	B	A	A
87	A	A	A	A	A	B	B	B	A	A	A	A	A	A	A	A	NA	A	NA	A	NA	B	B	A	A	A	A	A	A	A	A	A	A	B	NA	A	A	A	B	A	A	NA	A	A	A	NA	B	A	A
88	A	A	A	A	A	B	B	B	NA	A	A	A	A	A	A	A	NA	A	NA	A	NA	NA	NA	A	A	A	A	A	A	A	A	A	B	A	NA	B	B	B	A	B	B	A	A	NA	NA	NA	A	B	B
89	A	A	A	A	A	A	A	A	B	A	A	A	A	A	A	NA	A	NA	A	NA	A	A	A	A	A	NA	NA	A	B	A	B	B	A	B	NA	A	A	A	B	A	A	NA	A	A	A	NA	B	A	A
90	A	A	A	A	A	B	B	B	A	A	A	A	A	A	A	A	NA	A	NA	A	NA	NA	B	NA	A	A	A	A	A	A	A	A	B	A	NA	B	B	B	A	B	B	A	A	A	A	A	A	B	B
91	A	A	A	A	A	B	B	B	A	A	A	A	A	A	A	NA	NA	NA	NA	NA	NA	NA	NA	A	A	A	A	A	A	A	A	A	NA	A	NA	B	B	B	A	B	B	NA	A	NA	NA	A	NA	B	B
92	A	A	A	A	A	A	A	A	NA	A	A	A	A	A	A	NA	A	NA	A	NA	A	NA	NA	NA	A	NA	NA	A	B	A	B	B	NA	B	NA	A	A	A	B	A	A	NA	NA	NA	NA	NA	B	NA	NA
93	A	A	A	A	A	A	A	A	NA	A	A	A	A	A	A	NA	A	NA	A	NA	A	A	A	A	A	NA	NA	A	B	A	B	B	A	B	NA	A	A	A	B	A	A	NA	NA	A	A	NA	B	A	A
94	A	A	A	A	A	A	A	A	NA	A	A	A	A	A	A	NA	A	NA	A	NA	A	A	A	NA	A	NA	NA	A	B	A	B	B	A	B	NA	A	A	A	B	A	A	NA	A	A	A	NA	B	A	A
95	A	A	A	A	A	A	A	A	NA	A	A	A	A	A	A	NA	A	NA	A	NA	A	A	A	A	A	NA	NA	A	B	A	B	B	NA	B	NA	A	A	A	B	A	A	NA	NA	A	A	NA	B	A	A
96	A	A	A	A	A	A	A	A	NA	A	A	A	A	A	A	NA	A	NA	A	NA	A	A	A	A	A	NA	NA	A	B	A	B	B	A	B	NA	A	A	A	B	A	A	NA	A	A	A	NA	B	A	A
97	A	A	A	A	A	A	A	A	NA	A	A	A	A	A	A	NA	A	NA	A	NA	A	NA	NA	NA	A	NA	NA	A	B	A	B	B	NA	B	NA	A	A	A	B	A	A	NA	NA	A	A	NA	B	NA	NA
98	A	A	A	A	A	B	B	B	NA	A	A	A	A	A	A	NA	NA	NA	NA	NA	NA	NA	NA	NA	A	NA	NA	A	A	NA	A	A	NA	A	NA	B	B	B	A	B	B	A	NA	A	A	NA	A	NA	NA
99	A	A	A	A	A	A	A	A	NA	A	A	A	A	A	A	NA	A	NA	A	NA	A	A	A	A	A	NA	NA	A	B	A	B	B	A	B	NA	A	A	A	B	A	A	NA	NA	A	A	NA	B	A	A
100	A	A	A	A	A	B	B	B	A	A	A	A	A	A	A	NA	NA	NA	NA	NA	NA	B	B	A	A	A	A	A	A	A	A	A	NA	A	NA	B	B	B	A	B	B	A	A	A	A	A	A	B	B
101	A	A	A	A	A	B	B	B	A	A	A	A	A	A	A	A	NA	A	NA	A	NA	NA	NA	NA	A	NA	NA	A	B	A	B	B	NA	B	NA	A	A	A	B	A	A	NA	NA	A	A	NA	B	A	A
102	A	A	A	A	A	B	B	B	A	A	A	A	A	A	A	A	NA	A	NA	A	NA	NA	NA	A	A	A	A	A	A	A	A	A	B	A	NA	B	B	B	A	B	B	A	NA	A	A	A	A	B	B
103	A	A	A	A	A	A	A	A	NA	A	A	A	A	A	A	B	A	B	A	B	A	NA	NA	NA	A	NA	NA	A	B	A	B	B	NA	B	NA	A	A	A	B	A	A	NA	A	A	A	NA	B	A	A
104	A	A	A	A	A	A	A	A	NA	A	A	A	A	A	A	NA	A	NA	A	NA	A	A	A	A	A	NA	NA	A	B	A	B	B	NA	B	NA	A	A	A	B	A	A	NA	NA	A	A	NA	B	A	A
105	A	A	A	A	A	B	B	B	A	A	A	A	A	A	A	A	NA	A	NA	A	NA	B	B	NA	A	A	A	A	A	A	A	A	NA	A	NA	B	B	B	A	B	B	A	NA	NA	NA	A	A	B	B
106	A	A	A	A	A	B	B	B	NA	A	A	A	A	A	A	A	NA	A	NA	A	NA	NA	NA	NA	A	A	A	A	A	A	A	A	NA	A	NA	B	B	B	A	B	B	A	NA	A	A	A	A	NA	NA
107	A	A	A	A	A	A	A	A	NA	A	A	A	A	A	A	B	A	B	A	B	A	A	A	A	A	NA	NA	A	B	A	B	B	A	B	NA	A	A	A	B	A	A	NA	A	A	A	NA	B	A	A
108	A	A	A	A	A	A	A	A	NA	A	A	A	A	A	A	NA	A	NA	A	NA	A	NA	NA	A	A	NA	NA	A	B	A	B	B	A	B	NA	A	A	A	B	A	A	NA	NA	A	A	NA	B	A	A
109	A	A	A	A	A	B	B	B	A	A	A	A	A	A	A	A	NA	A	NA	A	NA	B	B	A	A	A	A	A	A	A	A	A	B	A	NA	B	B	B	A	B	B	A	A	A	A	A	A	B	B
110	A	A	A	A	A	A	A	A	NA	A	A	A	A	A	A	NA	A	NA	A	NA	A	NA	NA	NA	A	NA	NA	A	B	A	B	B	NA	B	NA	A	A	A	B	A	A	NA	NA	A	A	NA	B	NA	NA
111	A	A	A	A	A	A	A	A	B	A	A	A	A	A	A	B	A	B	A	B	A	A	A	A	A	NA	NA	A	B	A	B	B	A	B	NA	A	A	A	B	A	A	NA	A	A	A	NA	B	A	A
112	A	A	A	A	A	A	A	A	NA	A	A	A	A	A	A	NA	A	NA	A	NA	A	NA	NA	A	A	NA	NA	A	B	NA	B	B	NA	B	NA	A	A	A	B	A	A	NA	A	NA	NA	NA	B	A	A
113	A	A	A	A	A	A	A	A	NA	A	A	A	A	A	A	NA	A	NA	A	NA	A	A	A	NA	A	NA	NA	A	B	A	B	B	NA	B	NA	A	A	A	B	A	A	NA	NA	A	A	NA	B	A	A
114	A	A	A	A	A	B	B	B	A	A	A	A	A	A	A	A	NA	A	NA	A	NA	B	B	NA	A	A	A	A	A	A	A	A	NA	A	NA	B	B	B	A	B	B	A	A	NA	NA	A	A	B	B
115	A	A	A	A	A	A	A	A	NA	A	A	A	A	A	A	NA	A	NA	A	NA	A	NA	NA	NA	A	NA	NA	A	B	A	B	B	NA	B	NA	A	A	A	B	A	A	NA	NA	NA	NA	NA	B	NA	NA
116	A	A	A	A	A	B	B	B	A	A	A	A	A	A	A	A	NA	A	NA	A	NA	B	B	A	A	A	A	A	A	A	A	A	B	A	NA	B	B	B	B	A	A	NA	A	A	A	NA	B	A	A
117	A	A	A	A	A	B	B	B	A	A	A	A	A	A	A	A	NA	A	NA	A	NA	NA	NA	A	A	A	A	A	A	NA	A	A	NA	A	NA	B	B	B	A	B	B	A	NA	A	A	A	A	B	B
118	A	A	A	A	A	A	A	A	NA	A	A	A	A	A	A	NA	A	NA	A	NA	A	NA	NA	NA	A	NA	NA	A	B	A	B	B	NA	B	NA	A	A	A	B	A	A	NA	NA	A	A	NA	B	NA	NA
119	A	A	A	A	A	B	B	B	A	A	A	A	A	A	A	A	NA	A	NA	A	NA	B	B	A	A	A	A	A	A	A	A	A	NA	A	NA	B	B	B	A	B	B	A	A	A	A	A	A	B	B
120	A	A	A	A	A	B	B	B	A	A	A	A	A	A	A	A	B	A	B	A	B	B	B	A	A	A	A	A	A	A	A	A	B	A	NA	B	B	B	A	B	B	A	A	A	A	A	A	B	B
121	A	A	A	A	A	B	B	B	A	A	A	A	A	A	A	A	NA	A	NA	A	NA	B	B	A	A	A	A	A	A	A	A	A	B	A	NA	B	B	B	A	B	B	A	NA	A	A	A	A	B	B
122	A	A	A	A	A	B	B	B	NA	A	A	A	A	A	A	A	NA	A	NA	A	NA	B	B	NA	A	A	A	A	A	A	A	A	NA	A	NA	B	B	B	A	B	B	A	NA	A	A	A	A	B	B
123	A	A	A	A	A	A	A	A	B	A	A	A	A	A	A	NA	A	NA	A	NA	A	NA	NA	NA	A	NA	NA	A	B	A	B	B	NA	B	NA	A	A	A	B	A	A	NA	NA	NA	NA	NA	B	A	A
124	A	A	A	A	A	B	B	B	A	A	A	A	A	A	A	A	NA	A	NA	A	NA	NA	NA	NA	A	A	A	A	A	A	A	A	NA	A	NA	B	B	B	A	B	B	A	NA	A	A	A	A	B	B
125	A	A	A	A	A	A	A	A	B	A	A	A	A	A	A	B	A	B	A	B	A	A	A	A	A	NA	NA	A	B	A	B	B	A	B	NA	A	A	A	B	A	A	NA	A	A	A	NA	B	A	A
126	A	A	A	A	A	A	A	A	NA	A	A	A	A	A	A	B	A	B	A	B	A	A	A	A	A	NA	NA	A	B	A	B	B	A	B	NA	A	A	A	B	A	A	NA	A	A	A	NA	B	A	A
127	A	A	A	A	A	B	B	B	NA	A	A	A	A	A	A	A	NA	A	NA	A	NA	NA	NA	NA	A	A	A	A	A	A	A	A	NA	A	NA	B	B	B	A	B	B	NA	NA	NA	NA	NA	NA	NA	NA
128	A	A	A	A	A	B	B	B	NA	A	A	A	A	A	A	A	NA	A	NA	A	NA	NA	NA	NA	A	A	A	A	A	NA	A	A	NA	A	NA	B	B	B	A	B	B	A	NA	A	A	NA	A	NA	NA
129	A	A	A	A	A	B	B	B	NA	NA	NA	NA	NA	NA	NA	NA	NA	NA	NA	NA	NA	NA	NA	NA	A	A	A	A	A	NA	A	A	NA	A	NA	B	B	B	A	B	B	A	NA	NA	NA	NA	A	NA	NA
130	A	A	A	A	A	A	A	A	NA	A	A	A	A	A	A	NA	A	NA	A	NA	A	NA	NA	NA	A	NA	NA	A	B	A	B	B	A	B	NA	B	B	B	A	B	B	A	NA	A	A	A	A	B	B
131	A	A	A	A	A	B	B	B	A	A	A	A	A	A	A	A	NA	A	NA	A	NA	B	B	NA	A	A	A	A	A	A	A	A	B	A	NA	B	B	B	A	B	B	A	NA	A	A	A	A	B	B
132	A	A	A	A	A	A	A	A	NA	A	A	A	A	A	A	NA	A	NA	A	NA	A	NA	NA	NA	A	NA	NA	A	B	A	B	B	A	B	NA	A	A	A	B	A	A	NA	NA	NA	NA	NA	B	A	A
133	A	A	A	A	A	A	A	A	NA	A	A	A	A	A	A	B	A	NA	A	B	A	A	A	A	A	NA	NA	A	B	A	B	B	A	B	NA	A	A	A	B	A	A	NA	NA	NA	NA	NA	B	A	A
134	A	A	A	A	A	B	B	B	NA	NA	NA	NA	NA	NA	NA	NA	NA	NA	NA	NA	NA	NA	NA	NA	A	NA	NA	A	A	NA	A	A	NA	A	NA	B	B	B	NA	B	B	A	NA	A	A	NA	A	NA	NA
135	A	A	A	A	A	A	A	A	NA	A	A	A	A	A	A	NA	A	NA	A	NA	A	NA	NA	A	A	NA	NA	A	B	A	B	B	A	B	NA	A	A	A	B	A	A	NA	NA	NA	NA	NA	B	A	A
136	A	A	A	A	A	A	A	A	NA	A	A	A	A	A	A	B	A	B	A	B	A	A	A	A	A	NA	NA	A	B	A	B	B	A	B	NA	A	A	A	B	A	A	NA	A	A	A	NA	B	A	A
137	A	A	A	A	A	A	A	A	NA	A	A	A	A	A	A	NA	A	NA	A	NA	A	A	A	A	A	NA	NA	A	B	A	B	B	A	B	NA	A	A	A	B	A	A	NA	A	A	A	NA	B	A	A
138	A	A	A	A	A	A	A	A	NA	A	A	A	A	A	A	B	A	B	A	B	A	A	A	A	A	NA	NA	A	B	A	B	B	A	B	NA	A	A	A	B	A	A	NA	A	A	A	NA	B	A	A
139	A	A	A	A	A	A	A	A	NA	A	A	A	A	A	A	NA	A	NA	A	NA	A	NA	NA	NA	A	NA	NA	A	B	A	B	B	NA	B	NA	A	A	A	B	A	A	NA	NA	NA	NA	NA	B	A	A
140	A	A	A	A	A	A	A	A	NA	A	A	A	A	A	A	B	A	B	A	B	A	NA	NA	NA	A	NA	NA	A	B	A	B	B	NA	B	NA	A	A	A	B	A	A	NA	A	A	A	NA	B	A	A
141	A	A	A	A	A	B	B	B	NA	A	A	A	A	A	A	NA	NA	NA	NA	NA	NA	NA	NA	A	A	A	A	A	A	A	A	A	NA	A	NA	B	B	B	A	B	B	A	A	A	A	A	A	NA	NA
142	A	A	A	A	A	B	B	B	A	A	A	A	A	A	A	A	NA	A	NA	A	NA	B	B	A	A	A	A	A	A	A	A	A	B	A	NA	B	B	B	A	B	B	A	A	A	A	A	A	B	B
143	A	A	A	A	A	A	A	A	NA	A	A	A	A	A	A	NA	A	NA	A	NA	A	NA	NA	NA	A	NA	NA	A	B	A	B	B	NA	B	NA	A	A	A	B	A	A	NA	NA	NA	NA	NA	B	A	A
144	A	A	A	A	A	A	A	A	NA	A	A	A	A	A	A	NA	A	NA	A	NA	A	NA	NA	NA	A	NA	NA	A	B	A	B	B	NA	B	NA	A	A	A	B	A	A	NA	NA	NA	NA	NA	B	NA	NA
145	A	A	A	A	A	B	B	B	A	A	A	A	A	A	A	A	NA	A	NA	A	NA	NA	NA	A	A	A	A	A	A	A	A	A	NA	A	NA	B	B	B	A	B	B	A	NA	A	A	A	A	B	B
146	A	A	A	A	A	A	A	A	NA	A	A	A	A	A	A	NA	A	NA	A	NA	A	NA	NA	NA	A	NA	NA	A	B	A	B	B	A	B	NA	A	A	A	B	A	A	NA	NA	NA	NA	NA	NA	NA	NA
147	A	A	A	A	A	B	B	B	A	A	A	A	A	A	A	A	NA	A	NA	A	NA	NA	NA	NA	A	A	A	A	A	A	A	A	B	A	NA	B	B	B	A	B	B	A	NA	A	A	A	A	B	B
148	A	A	A	A	A	B	B	B	NA	A	A	A	A	A	A	NA	NA	NA	NA	NA	NA	NA	NA	NA	A	A	A	A	A	A	A	A	B	A	NA	B	B	B	A	B	B	NA	NA	NA	NA	A	NA	NA	NA
149	A	A	A	A	A	A	A	A	NA	A	A	A	A	A	A	NA	A	NA	A	NA	A	A	A	A	A	NA	NA	A	B	A	B	B	NA	B	NA	B	B	B	A	B	B	A	NA	A	A	A	A	B	B
150	A	A	A	A	A	B	B	B	NA	A	A	A	A	A	A	NA	NA	NA	NA	NA	NA	NA	NA	NA	A	A	A	A	A	A	A	A	NA	A	NA	B	B	B	A	B	B	A	NA	A	A	A	A	B	B
151	A	A	A	A	A	B	B	B	A	A	A	A	A	A	A	A	NA	A	NA	A	NA	B	B	NA	A	A	A	A	A	A	A	A	NA	A	NA	B	B	B	A	B	B	A	NA	A	A	A	A	B	B
152	A	A	A	A	A	B	B	B	A	A	A	A	A	A	A	A	B	A	B	A	B	B	B	A	A	A	A	A	A	A	A	A	B	A	NA	B	B	B	A	B	B	A	A	A	A	A	A	B	B
153	A	A	A	A	A	NA	NA	B	NA	A	A	A	A	A	A	NA	NA	NA	NA	NA	NA	NA	NA	NA	A	A	A	A	A	A	A	A	NA	A	NA	B	B	B	A	B	B	NA	NA	NA	NA	NA	NA	B	B
154	A	A	A	A	A	B	B	B	NA	A	A	A	A	A	A	NA	NA	NA	NA	NA	NA	NA	NA	NA	A	A	A	A	A	A	A	A	NA	A	NA	B	B	B	A	B	B	A	A	NA	NA	NA	A	B	B
155	A	A	A	A	A	A	A	A	NA	A	A	A	A	A	A	NA	A	NA	A	NA	A	NA	NA	NA	A	NA	NA	A	B	A	B	B	NA	B	NA	A	A	A	B	A	A	NA	NA	A	A	NA	B	NA	NA
156	A	A	A	A	A	A	A	A	NA	A	A	A	A	A	A	B	A	B	A	B	A	A	A	A	A	NA	NA	A	B	A	B	B	A	B	NA	A	A	A	B	A	A	NA	A	A	A	NA	B	A	A
157	A	A	A	A	A	B	B	B	A	A	A	A	A	A	A	A	NA	A	NA	A	NA	NA	NA	NA	A	A	A	A	A	A	A	A	NA	A	NA	B	B	B	A	B	B	A	A	A	A	NA	A	B	B
158	A	A	A	A	A	B	B	B	NA	A	A	A	A	A	A	A	NA	A	NA	A	NA	NA	NA	NA	A	A	A	A	A	NA	A	A	NA	A	NA	B	B	B	A	B	B	A	NA	A	A	NA	A	NA	NA
159	A	A	A	A	A	A	A	A	NA	A	A	A	A	A	A	NA	A	NA	A	NA	A	NA	NA	NA	A	NA	NA	A	B	NA	B	B	NA	B	NA	A	A	A	B	A	A	NA	NA	NA	NA	NA	B	NA	NA
160	A	A	A	A	A	B	B	B	NA	A	A	A	A	A	A	A	NA	A	NA	A	NA	NA	NA	NA	A	A	A	A	A	NA	A	A	NA	A	NA	B	B	B	A	B	B	A	NA	A	A	NA	A	NA	NA
161	A	A	A	A	A	B	B	B	A	A	A	A	A	A	A	A	NA	A	NA	A	NA	NA	NA	NA	A	A	A	A	A	A	A	A	NA	A	NA	B	B	B	A	B	B	NA	NA	NA	NA	NA	NA	B	B
162	A	A	A	A	A	A	A	A	NA	A	A	A	A	A	A	NA	A	NA	A	NA	A	NA	NA	NA	A	NA	NA	A	B	A	B	B	NA	B	NA	A	A	A	B	A	A	NA	NA	NA	NA	NA	NA	NA	NA
163	A	A	A	A	A	A	A	A	B	A	A	A	A	A	A	NA	A	NA	A	NA	A	A	A	NA	A	NA	NA	A	B	A	B	B	A	B	NA	A	A	A	B	A	A	NA	NA	A	A	NA	B	NA	NA
164	A	A	A	A	A	A	A	A	B	A	A	A	A	A	A	B	A	B	A	B	A	A	A	A	A	NA	NA	A	B	A	B	B	A	B	NA	A	A	A	B	A	A	NA	A	A	A	NA	B	A	A
165	A	A	A	A	A	A	A	A	NA	A	A	A	A	A	A	NA	A	NA	A	NA	A	NA	NA	NA	A	NA	NA	A	B	A	A	A	NA	A	NA	B	B	B	A	B	B	A	NA	NA	NA	A	A	B	B
166	A	A	A	A	A	A	A	A	NA	A	A	A	A	A	A	NA	A	NA	A	NA	A	NA	NA	NA	A	NA	NA	A	B	A	B	B	NA	B	NA	A	A	A	B	A	A	NA	NA	A	A	NA	B	NA	NA
167	A	A	A	A	A	A	A	A	NA	A	A	A	A	A	A	NA	A	NA	A	NA	A	A	A	A	A	NA	NA	A	B	A	B	B	A	B	NA	A	A	A	B	A	A	NA	NA	NA	NA	NA	B	A	A
168	A	A	A	A	A	A	A	A	NA	A	A	A	A	A	A	NA	A	NA	A	NA	A	NA	NA	NA	A	NA	NA	A	B	A	B	B	NA	B	NA	A	A	A	B	A	A	NA	NA	A	A	NA	B	NA	NA
169	A	A	A	A	A	A	A	A	NA	A	A	A	A	A	A	B	A	B	A	B	A	A	A	A	A	NA	NA	A	B	A	B	B	A	B	NA	A	A	A	B	A	A	NA	NA	A	A	NA	B	A	A
170	A	A	A	A	A	A	A	A	NA	A	A	A	A	A	A	NA	A	NA	A	NA	A	A	A	A	A	NA	NA	A	B	A	B	B	A	B	NA	A	A	A	B	A	A	NA	NA	A	A	NA	B	NA	NA
171	A	A	A	A	A	B	B	B	A	A	A	A	A	A	A	NA	NA	NA	NA	NA	NA	NA	NA	NA	A	NA	NA	A	A	A	A	A	NA	A	NA	B	B	B	A	B	B	NA	NA	NA	NA	NA	NA	NA	NA
172	A	A	A	A	A	A	A	A	NA	A	A	A	A	A	A	B	A	B	A	B	A	A	A	A	A	NA	NA	A	B	A	B	B	A	B	NA	B	B	B	A	B	B	A	A	A	A	A	A	B	B
173	A	A	A	A	A	A	A	A	NA	A	A	A	A	A	A	NA	A	NA	A	NA	A	NA	NA	NA	A	NA	NA	A	B	A	B	B	NA	B	NA	A	A	A	B	A	A	NA	NA	A	A	NA	B	A	A
174	A	A	A	A	A	A	A	A	NA	A	A	A	A	A	A	NA	A	NA	A	NA	A	NA	NA	NA	A	NA	NA	A	B	A	B	B	NA	B	NA	A	A	A	B	A	A	NA	NA	A	A	NA	B	NA	NA
175	A	A	A	A	A	B	B	B	A	A	A	A	A	A	A	A	NA	A	NA	A	NA	B	B	A	A	A	A	A	A	A	A	A	B	A	NA	B	B	B	A	B	B	A	A	A	A	A	A	B	B
176	A	A	A	A	A	A	A	A	NA	A	A	A	A	A	A	NA	A	NA	A	NA	A	NA	NA	NA	A	NA	NA	A	B	A	B	B	NA	B	NA	A	A	A	B	A	A	NA	NA	A	A	NA	B	NA	NA
177	NA	NA	NA	NA	NA	A	A	A	NA	A	A	A	A	A	A	NA	A	NA	A	NA	A	NA	NA	NA	A	NA	NA	A	B	A	B	B	NA	B	NA	A	A	A	NA	A	A	NA	NA	NA	NA	NA	B	NA	NA
178	A	A	A	A	A	A	A	A	NA	A	A	A	A	A	A	NA	A	NA	A	NA	A	NA	NA	NA	A	NA	NA	A	B	A	B	B	NA	B	NA	A	A	A	B	A	A	NA	NA	NA	NA	NA	NA	A	A
179	A	A	A	A	A	B	B	B	NA	A	A	A	A	A	A	A	NA	A	NA	A	NA	NA	NA	NA	A	A	A	A	A	A	A	A	B	A	NA	B	B	B	A	B	B	A	A	A	A	A	A	B	B
180	A	A	A	A	A	A	A	A	NA	A	A	A	A	A	A	NA	A	NA	A	NA	A	NA	NA	NA	A	NA	NA	A	B	A	B	B	A	B	NA	A	A	A	B	A	A	NA	NA	A	A	NA	B	A	A
181	A	A	A	A	A	B	B	B	A	A	A	A	A	A	A	A	NA	A	NA	A	NA	NA	NA	A	A	A	A	A	A	A	A	A	NA	A	NA	B	B	B	A	B	B	A	NA	A	A	A	A	B	B
182	A	A	A	A	A	B	B	B	NA	A	A	A	A	A	A	A	NA	A	NA	A	NA	NA	NA	NA	A	A	A	A	A	A	A	A	NA	A	NA	B	B	B	A	B	B	NA	NA	A	A	NA	A	NA	NA
183	A	A	A	A	A	B	B	B	NA	A	A	A	A	A	A	A	NA	A	NA	A	NA	B	B	NA	A	A	A	A	A	A	A	A	NA	A	NA	B	B	B	A	B	B	A	NA	A	A	A	A	B	B
184	A	A	A	A	A	B	B	B	A	A	A	A	A	A	A	A	NA	A	NA	A	NA	B	B	A	A	A	A	A	A	A	A	A	B	A	NA	B	B	B	A	B	B	A	A	A	A	A	A	B	B
185	A	A	A	A	A	A	A	A	NA	A	A	A	A	A	A	NA	A	NA	A	NA	A	NA	NA	NA	A	NA	NA	A	B	NA	B	B	NA	B	NA	A	A	A	B	A	A	NA	NA	A	A	NA	B	NA	NA
186	A	A	A	A	A	B	B	B	A	A	A	A	A	A	A	A	NA	A	NA	A	NA	B	B	NA	A	A	A	A	A	A	A	A	B	A	NA	B	B	B	A	B	B	A	NA	A	A	A	A	B	B
187	A	A	A	A	A	A	A	A	NA	A	A	A	A	A	A	NA	A	NA	A	NA	A	A	A	A	A	NA	NA	A	B	A	B	B	NA	B	NA	A	A	A	B	A	A	NA	NA	A	A	NA	B	A	A
188	A	A	A	A	A	B	B	B	A	A	A	A	A	A	A	A	NA	A	NA	A	NA	NA	NA	A	A	A	A	A	A	A	A	A	NA	A	NA	B	B	B	A	B	B	A	NA	NA	NA	A	A	B	B
189	A	A	A	A	A	A	A	A	NA	A	A	A	A	A	A	NA	A	NA	A	NA	A	NA	NA	NA	A	NA	NA	A	B	A	B	B	A	B	NA	A	A	A	B	A	A	NA	A	A	A	NA	B	A	A
190	A	A	A	A	A	B	B	B	NA	A	A	A	A	A	A	A	NA	A	NA	A	NA	NA	NA	NA	A	A	A	A	A	A	A	A	NA	A	NA	B	B	B	A	B	B	A	NA	A	A	A	A	B	B
191	A	A	A	A	A	A	A	A	NA	A	A	A	A	A	A	NA	A	NA	A	NA	A	NA	NA	NA	A	NA	NA	A	B	A	B	B	NA	B	NA	A	A	A	B	A	A	NA	NA	A	A	NA	B	NA	NA
192	A	A	A	A	A	A	A	A	B	A	A	A	A	A	A	B	A	B	A	B	A	A	A	A	A	NA	NA	A	B	A	B	B	A	B	NA	A	A	A	B	A	A	NA	A	A	A	NA	B	A	A
[truncated: 5,000 more columns]
