# Supplementary material for: Genetic Basis of Body Color and Spotting Pattern in Redheaded Pine Sawfly Larvae ( Neodiprion lecontei )
Source: Oxford University Press journal article supplement (doi:10.1534/genetics.118.300793), 2018-02-28
Supplement: 0291_files7.xlsx [file 0291_files7.xlsx]

## Sheet: All_families
Scaffold ID	scaffold position	LG	genetic position
scaffold_163	135998	1	0
scaffold_195	209780	1	1e-07
scaffold_143	259321	1	1.61966
scaffold_143	198777	1	1.74419
scaffold_143	116285	1	3.06779
scaffold_114	331010	1	6.93197
scaffold_114	286387	1	6.93197
scaffold_63	430935	1	7.277
scaffold_63	321745	1	8.51035
scaffold_63	293490	1	8.51035
scaffold_18	312332	1	12.5875
scaffold_267	73181	1	17.2301
scaffold_102	72356	1	17.5745
scaffold_102	250149	1	19.6473
scaffold_593	32004	1	21.12
scaffold_632	72335	1	26.6153
scaffold_72	238124	1	31.0213
scaffold_72	253134	1	31.0213
scaffold_252	112273	1	33.6013
scaffold_73	35650	1	34.7191
scaffold_73	218201	1	35.0617
scaffold_850	26452	1	38.5811
scaffold_37	79386	1	38.5811
scaffold_37	431845	1	41.1153
scaffold_94	328233	1	41.1153
scaffold_94	244000	1	41.2932
scaffold_90	290030	1	44.5693
scaffold_90	189486	1	44.6264
scaffold_90	69918	1	45.9677
scaffold_150	259242	1	46.9112
scaffold_283	86078	1	46.9112
scaffold_15	175889	1	51.9541
scaffold_97	175793	1	57.0461
scaffold_97	149726	1	57.0461
scaffold_97	15525	1	57.9948
scaffold_190	29735	1	58.9517
scaffold_190	42663	1	58.9517
scaffold_190	113198	1	59.1792
scaffold_190	128274	1	59.1792
scaffold_190	173941	1	59.6838
scaffold_190	255506	1	62.329
scaffold_190	296546	1	62.329
scaffold_508	85857	1	63.2542
scaffold_508	35598	1	63.9713
scaffold_424	114168	1	67.1463
scaffold_344	49776	1	67.5424
scaffold_248	57506	1	68.6806
scaffold_248	129812	1	68.6953
scaffold_258	234401	1	69.8602
scaffold_258	84164	1	70.9883
scaffold_215	199608	1	71.5624
scaffold_1038	33134	1	73.1944
scaffold_1536	17713	1	73.1944
scaffold_961	39596	1	73.1944
scaffold_225	139978	1	75.9122
scaffold_236	189932	1	80.784
scaffold_236	177854	1	80.784
scaffold_763	26859	1	82.4726
scaffold_100	50652	1	83.056
scaffold_100	306473	1	84.4232
scaffold_59	130339	1	102.647
scaffold_179	42382	1	105.862
scaffold_92	135068	1	111.554
scaffold_92	35329	1	111.554
scaffold_766	66446	1	111.554
scaffold_55	24994	1	112.523
scaffold_55	89743	1	113.407
scaffold_118	91188	1	115.249
scaffold_118	102798	1	115.249
scaffold_339	172757	1	118.586
scaffold_32	31185	1	118.586
scaffold_32	459098	1	120.998
scaffold_41	187457	1	122.814
scaffold_41	37869	1	123.502
scaffold_64	322293	1	126.146
scaffold_43	246725	1	126.771
scaffold_43	437417	1	126.949
scaffold_198	63469	1	127.118
scaffold_198	200511	1	127.807
scaffold_198	298879	1	129.181
scaffold_29	297120	1	132.105
scaffold_107	350566	1	133.189
scaffold_1190	6618	1	133.739
scaffold_613	100406	1	141.71
scaffold_613	88319	1	141.71
scaffold_1542	3723	1	141.71
scaffold_56	134146	1	145.308
scaffold_54	394918	1	145.974
scaffold_54	118283	1	147.003
scaffold_54	86746	1	147.379
scaffold_300	244294	1	147.994
scaffold_300	140786	1	149.884
scaffold_360	96441	1	151.016
scaffold_80	379624	1	151.238
scaffold_124	265107	1	160.129
scaffold_177	273345	1	164.1
scaffold_177	263112	1	164.1
scaffold_194	175995	1	178.449
scaffold_7	220415	1	188.77
scaffold_176	269024	1	188.77
scaffold_47	482159	2	0
scaffold_188	137573	2	1e-07
scaffold_188	97219	2	2e-07
scaffold_188	63747	2	3e-07
scaffold_321	30933	2	8.14885
scaffold_120	318473	2	14.1181
scaffold_230	96432	2	16.1903
scaffold_480	84911	2	16.2942
scaffold_537	111233	2	24.7922
scaffold_622	82005	2	28.2307
scaffold_1519	21396	2	37.9869
scaffold_101	323514	2	37.9869
scaffold_101	320623	2	37.9869
scaffold_829	27759	2	40.6255
scaffold_1050	40049	2	40.8224
scaffold_1050	18050	2	40.8224
scaffold_303	107483	2	45.8655
scaffold_303	220055	2	46.7677
scaffold_231	135127	2	46.8023
scaffold_422	173604	2	47.6281
scaffold_245	41349	2	47.9935
scaffold_245	199349	2	47.9935
scaffold_24	398929	2	55.121
scaffold_24	107048	2	57.6143
scaffold_327	163261	2	57.6159
scaffold_254	170717	2	63.8852
scaffold_254	25295	2	63.8852
scaffold_445	45371	2	63.9671
scaffold_84	138728	2	70.0079
scaffold_84	31257	2	72.9969
scaffold_493	112069	2	73.7264
scaffold_60	456173	2	73.968
scaffold_10	325942	2	75.9021
scaffold_157	150498	2	76.3775
scaffold_39	230997	2	79.4326
scaffold_39	81263	2	79.4326
scaffold_309	35981	2	83.8595
scaffold_309	185374	2	84.3489
scaffold_628	22292	2	88.6916
scaffold_292	182001	2	92.3004
scaffold_581	30179	2	93.3437
scaffold_375	156276	2	93.3437
scaffold_375	201936	2	93.3437
scaffold_589	109300	2	108.393
scaffold_1578	18235	2	108.393
scaffold_1578	20716	2	108.393
scaffold_571	9224	2	117.915
scaffold_304	136527	2	119.443
scaffold_304	112702	2	119.443
scaffold_304	71194	2	119.443
scaffold_304	57445	2	119.443
scaffold_859	39652	2	119.443
scaffold_218	38290	2	125.255
scaffold_268	69117	2	125.255
scaffold_268	182752	2	125.54
scaffold_239	31921	2	126.414
scaffold_443	108261	2	133.812
scaffold_615	47523	2	137.908
scaffold_615	100375	2	137.908
scaffold_533	47955	2	140.762
scaffold_385	89326	2	143.501
scaffold_93	366537	2	145.533
scaffold_968	46127	2	148.649
scaffold_23	563324	2	148.955
scaffold_23	458197	2	150.454
scaffold_23	126040	2	152.491
scaffold_17	82474	2	152.51
scaffold_17	164771	2	152.724
scaffold_17	267117	2	153.23
scaffold_17	293258	2	153.23
scaffold_17	361593	2	153.451
scaffold_174	309329	2	155.052
scaffold_3	583515	2	164.673
scaffold_3	777673	2	165.166
scaffold_1635	4422	2	168.502
scaffold_787	71553	2	169.128
scaffold_125	11386	2	179.813
scaffold_295	83697	2	179.813
scaffold_431	168007	2	179.864
scaffold_788	70597	2	187.462
scaffold_170	30626	2	189.856
scaffold_36	200405	2	193.965
scaffold_36	203965	2	193.965
scaffold_36	262081	2	194.171
scaffold_36	317757	2	194.387
scaffold_36	374419	2	194.387
scaffold_156	1819	2	195.137
scaffold_368	209955	2	195.137
scaffold_474	28674	3	0
scaffold_503	1860	3	1e-07
scaffold_834	49286	3	0.460223
scaffold_834	48816	3	0.460223
scaffold_1004	50970	3	4.16284
scaffold_131	75365	3	7.31516
scaffold_1572	6601	3	10.0438
scaffold_419	147092	3	10.645
scaffold_370	161857	3	15.4395
scaffold_370	140816	3	15.4395
scaffold_401	33712	3	15.8186
scaffold_14	670945	3	22.6376
scaffold_678	87549	3	28.9449
scaffold_258	29550	3	41.8394
scaffold_427	67676	3	41.8394
scaffold_9	198641	3	46.8144
scaffold_9	243042	3	46.8144
scaffold_9	276749	3	46.8144
scaffold_9	433677	3	48.6315
scaffold_9	662864	3	50.3183
scaffold_207	1032	3	50.3832
scaffold_171	68593	3	53.5167
scaffold_872	69644	3	54.5142
scaffold_293	156452	3	54.9804
scaffold_293	133854	3	54.9804
scaffold_611	93841	3	55.3877
scaffold_155	73608	3	58.7789
scaffold_446	78988	3	58.7789
scaffold_148	102178	3	62.959
scaffold_494	108654	3	64.0241
scaffold_494	1211	3	66.1779
scaffold_524	95195	3	66.9272
scaffold_320	92523	3	68.542
scaffold_320	128119	3	69.0544
scaffold_320	187487	3	70.7042
scaffold_154	266146	3	71.2528
scaffold_144	17375	3	71.5092
scaffold_290	218507	3	80.9422
scaffold_498	110489	3	82.3837
scaffold_1439	19119	3	83.6468
scaffold_1439	20067	3	83.6468
scaffold_908	43591	3	87.4799
scaffold_828	29465	3	87.4799
scaffold_311	66634	3	89.2358
scaffold_402	125670	3	93.2159
scaffold_484	23897	3	93.2159
scaffold_484	122484	3	93.3992
scaffold_68	258378	3	94.0888
scaffold_31	81675	3	103.097
scaffold_31	182256	3	103.097
scaffold_31	389683	3	104.282
scaffold_31	528797	3	104.607
scaffold_487	57191	3	105.23
scaffold_550	19904	3	109.681
scaffold_175	270954	3	110.061
scaffold_663	39653	3	112.355
scaffold_349	49193	3	114.761
scaffold_349	95456	3	114.761
scaffold_395	44184	3	115.935
scaffold_12	569163	3	123.052
scaffold_127	171782	3	125.234
scaffold_52	201314	3	128.892
scaffold_87	23559	3	131.651
scaffold_69	39420	3	133.838
scaffold_205	296181	3	136.299
scaffold_205	21489	3	137.552
scaffold_670	11014	3	141.625
scaffold_1321	21825	3	156.327
scaffold_989	13550	3	156.327
scaffold_534	17649	3	158.782
scaffold_583	63419	3	160.441
scaffold_583	44308	3	160.441
scaffold_1579	19507	3	179.76
scaffold_1216	17474	3	181.915
scaffold_601	53538	3	181.915
scaffold_112	51792	4	0
scaffold_202	145893	4	1e-07
scaffold_425	151920	4	2e-07
scaffold_506	5193	4	23.6241
scaffold_2222	16224	4	25.4195
scaffold_701	56170	4	30.898
scaffold_772	46585	4	36.2593
scaffold_753	7807	4	36.2593
scaffold_1125	32944	4	41.2609
scaffold_1440	2079	4	43.0091
scaffold_1462	24397	4	44.2158
scaffold_761	70840	4	48.4256
scaffold_1405	9111	4	52.0792
scaffold_911	50549	4	52.0792
scaffold_495	71828	4	55.9488
scaffold_495	12131	4	55.9488
scaffold_1980	9744	4	56.8921
scaffold_1313	9813	4	57.8439
scaffold_504	105702	4	61.5854
scaffold_665	70953	4	62.2105
scaffold_665	57771	4	62.2105
scaffold_416	68363	4	63.1733
scaffold_371	39690	4	63.6358
scaffold_1966	5381	4	63.803
scaffold_3544	1176	4	63.803
scaffold_25	476031	4	69.3283
scaffold_66	295458	4	74.818
scaffold_66	84254	4	76.745
scaffold_185	186185	4	79.5446
scaffold_185	44363	4	80.4696
scaffold_98	272154	4	84.997
scaffold_98	272046	4	84.997
scaffold_282	184431	4	92.1833
scaffold_282	174207	4	92.1833
scaffold_40	173723	4	95.7023
scaffold_40	135120	4	95.8014
scaffold_113	44127	4	95.8735
scaffold_406	148801	4	101.217
scaffold_959	23818	4	106.75
scaffold_242	184067	4	107.828
scaffold_242	25866	4	107.828
scaffold_89	120953	4	107.828
scaffold_42	450790	4	110.112
scaffold_42	280267	4	111.238
scaffold_42	71107	4	111.238
scaffold_136	81447	4	112.252
scaffold_136	189851	4	112.399
scaffold_136	212256	4	112.399
scaffold_136	228086	4	112.666
scaffold_142	60867	4	114.876
scaffold_119	315758	4	116.114
scaffold_200	40792	4	118.847
scaffold_200	12368	4	118.847
scaffold_259	138157	4	121.343
scaffold_49	181999	4	124.666
scaffold_49	462621	4	127.806
scaffold_48	73672	4	127.909
scaffold_181	44978	4	129.651
scaffold_181	95624	4	129.651
scaffold_35	34495	4	132.405
scaffold_50	185253	4	132.405
scaffold_545	85260	4	140.872
scaffold_432	29415	4	144.899
scaffold_329	39140	4	147.064
scaffold_816	13796	4	147.064
scaffold_297	162079	4	159.513
scaffold_1110	1715	4	161.078
scaffold_8	670936	4	170.936
scaffold_4	754984	4	187.241
scaffold_1	342054	4	192.538
scaffold_1	381190	4	192.538
scaffold_1	634765	4	195.755
scaffold_1	1180940	4	197.411
scaffold_1	1368227	4	197.411
scaffold_126	193392	5	0
scaffold_212	45768	5	1e-07
scaffold_162	273048	5	3.88662
scaffold_162	184190	5	5.48163
scaffold_382	17536	5	5.95816
scaffold_141	283922	5	12.1257
scaffold_397	172273	5	16.2963
scaffold_1217	11747	5	18.16
scaffold_20	342373	5	25.5441
scaffold_381	3754	5	27.5231
scaffold_381	178089	5	29.3013
scaffold_278	158311	5	30.3794
scaffold_525	111480	5	30.3794
scaffold_756	47554	5	50.664
scaffold_61	100510	5	52.5456
scaffold_450	105823	5	52.5684
scaffold_529	67169	5	53.573
scaffold_99	262634	5	57.4056
scaffold_99	87169	5	59.552
scaffold_399	164916	5	62.6838
scaffold_1111	19709	5	68.1836
scaffold_3680	1066	5	68.1836
scaffold_161	129625	5	68.8567
scaffold_161	203194	5	68.8567
scaffold_33	360441	5	71.1237
scaffold_78	379838	5	73.9485
scaffold_544	49529	5	78.7318
scaffold_134	113182	5	78.7318
scaffold_134	271419	5	79.3938
scaffold_810	30396	5	80.2107
scaffold_1256	27096	5	82.6795
scaffold_1096	30186	5	83.2219
scaffold_211	222541	5	86.9732
scaffold_189	182202	5	87.6061
scaffold_189	141321	5	87.6907
scaffold_361	86406	5	88.905
scaffold_452	52734	5	88.905
scaffold_400	15127	5	99.2697
scaffold_500	16175	5	100.297
scaffold_26	44707	5	101.108
scaffold_442	8254	5	107.364
scaffold_442	70633	5	107.364
scaffold_224	22693	5	107.364
scaffold_95	245561	5	119.106
scaffold_374	24221	5	120.36
scaffold_28	20242	5	127.222
scaffold_335	146626	5	127.994
scaffold_62	317397	5	132.665
scaffold_62	443141	5	133.039
scaffold_420	78267	5	137.427
scaffold_420	77195	5	137.427
scaffold_164	143410	5	137.427
scaffold_386	131534	5	137.427
scaffold_417	171467	5	139.907
scaffold_13	104351	5	140.634
scaffold_657	9278	5	149.602
scaffold_21	564195	5	154.79
scaffold_21	249055	5	154.79
scaffold_21	78355	5	156.712
scaffold_253	54768	5	157.168
scaffold_30	54709	5	159.203
scaffold_2	780318	5	159.215
scaffold_2	719485	5	159.215
scaffold_2	396649	5	159.215
scaffold_2	259008	5	159.215
scaffold_531	1413	6	0
scaffold_109	305275	6	1e-07
scaffold_109	159718	6	2e-07
scaffold_109	119662	6	0.323277
scaffold_109	85622	6	0.323277
scaffold_193	7622	6	5.58107
scaffold_285	30282	6	9.70683
scaffold_285	51378	6	9.70683
scaffold_473	26410	6	11.906
scaffold_353	99194	6	12.1694
scaffold_451	101644	6	16.8304
scaffold_451	150899	6	18.381
scaffold_173	49169	6	18.381
scaffold_173	66532	6	18.9668
scaffold_221	107139	6	21.9032
scaffold_490	19335	6	21.9032
scaffold_38	340540	6	30.9086
scaffold_251	210557	6	31.2665
scaffold_251	96741	6	31.6316
scaffold_315	169937	6	32.1952
scaffold_116	161888	6	32.1952
scaffold_187	218096	6	51.0762
scaffold_243	2307	6	55.683
scaffold_243	255882	6	55.683
scaffold_209	25060	6	64.8915
scaffold_350	87833	6	82.1515
scaffold_132	59845	6	82.1515
scaffold_132	98287	6	82.1515
scaffold_53	341810	6	83.6714
scaffold_53	219001	6	83.6714
scaffold_530	17629	6	87.4135
scaffold_67	225072	6	91.4555
scaffold_260	126218	6	95.8583
scaffold_196	66188	6	99.007
scaffold_216	178405	6	99.007
scaffold_779	63377	6	101.523
scaffold_51	139242	6	107.4
scaffold_51	188982	6	107.4
scaffold_108	217950	6	115.661
scaffold_27	67898	6	116.853
scaffold_27	442233	6	120.23
scaffold_74	406317	6	120.23
scaffold_316	136292	6	123.683
scaffold_152	255137	6	124.765
scaffold_22	73212	6	128.222
scaffold_22	350878	6	130.125
scaffold_22	489783	6	130.125
scaffold_65	433232	6	130.41
scaffold_734	15987	6	139.864
scaffold_135	41001	6	139.864
scaffold_75	422922	6	139.864
scaffold_549	99112	7	0
scaffold_348	116994	7	1e-05
scaffold_323	104606	7	2e-05
scaffold_521	95069	7	6.13755
scaffold_1272	31779	7	9.10181
scaffold_466	11918	7	18.4835
scaffold_661	63513	7	18.4835
scaffold_287	162874	7	21.7198
scaffold_287	217339	7	21.8052
scaffold_301	178938	7	22.6578
scaffold_410	159074	7	25.1721
scaffold_363	90545	7	25.6318
scaffold_312	57746	7	29.3684
scaffold_312	194162	7	30.3506
scaffold_677	74528	7	31.0359
scaffold_705	75398	7	31.3791
scaffold_159	252556	7	31.9291
scaffold_477	42444	7	39.5272
scaffold_477	79786	7	39.5272
scaffold_477	132586	7	39.6867
scaffold_522	80329	7	39.6897
scaffold_1035	24855	7	41.9977
scaffold_5	768863	7	42.7591
scaffold_247	191841	7	47.7677
scaffold_723	49744	7	48.4022
scaffold_949	6208	7	50.838
scaffold_944	47283	7	51.4148
scaffold_277	240407	7	54.2892
scaffold_277	257131	7	54.2892
scaffold_467	92978	7	58.9256
scaffold_1432	8764	7	83.2241
scaffold_314	6436	7	85.0388
scaffold_383	106493	7	85.5364
scaffold_1341	24150	7	88.8747
scaffold_1630	10353	7	93.0091
scaffold_517	3463	7	93.0092
scaffold_553	28954	7	94.3736
scaffold_652	31588	7	96.7018
scaffold_394	106682	7	98.6999
scaffold_394	169872	7	98.6999
scaffold_203	112187	7	100.633
scaffold_203	161257	7	100.633
scaffold_448	95994	7	105.808
scaffold_448	39701	7	106.062
scaffold_512	70089	7	106.371
scaffold_512	30536	7	106.624
scaffold_70	420979	7	106.747
scaffold_511	136908	7	106.747

## Sheet: Family7
Scaffold ID	scaffold position	LG	genetic position
scaffold_709	6004	1	0
scaffold_709	43445	1	0
scaffold_421	40929	1	0
scaffold_709	43438	1	0
scaffold_421	58857	1	0
scaffold_179	63471	1	1.57247
scaffold_179	63474	1	1.57247
scaffold_179	188751	1	2.52424
scaffold_766	57409	1	5.95952
scaffold_379	49399	1	6.918
scaffold_342	125567	1	18.0094
scaffold_54	52280	1	26.4731
scaffold_308	189615	1	64.7247
scaffold_675	48524	1	64.7247
scaffold_675	25777	1	64.7247
scaffold_308	110289	1	66.1676
scaffold_308	61207	1	66.1676
scaffold_124	265054	1	67.0757
scaffold_177	306164	1	70.1964
scaffold_177	304813	1	70.1964
scaffold_281	219066	1	70.1964
scaffold_177	265516	1	73.0509
scaffold_177	133360	1	75.3929
scaffold_151	63983	1	80.3251
scaffold_151	132735	1	90.1243
scaffold_520	137447	1	97.1149
scaffold_520	137451	1	97.1149
scaffold_194	156924	1	100.535
scaffold_194	156964	1	100.535
scaffold_194	156923	1	100.535
scaffold_1513	18493	1	107.286
scaffold_7	281533	1	114.634
scaffold_7	356610	1	114.634
scaffold_176	89844	1	116.456
scaffold_7	195526	1	116.456
scaffold_176	89793	1	116.456
scaffold_7	195513	1	116.456
scaffold_176	269024	1	116.456
scaffold_7	3130	1	116.456
scaffold_176	65563	1	116.456
scaffold_608	92977	1	116.456
scaffold_7	251987	1	117.694
scaffold_199	241255	1	120.436
scaffold_1100	32284	1	132.242
scaffold_194	175995	1	132.242
scaffold_257	252085	1	132.242
scaffold_194	317157	1	132.242
scaffold_194	283143	1	132.242
scaffold_257	252030	1	132.242
scaffold_151	245370	1	140.737
scaffold_151	245407	1	140.737
scaffold_463	151509	1	140.737
scaffold_151	265152	1	146.112
scaffold_463	118907	1	146.112
scaffold_151	265130	1	146.112
scaffold_151	265151	1	146.112
scaffold_177	10156	1	146.112
scaffold_151	265122	1	146.112
scaffold_463	154037	1	146.112
scaffold_151	343225	1	146.112
scaffold_463	151514	1	146.112
scaffold_177	112367	1	151.967
scaffold_177	263112	1	157.013
scaffold_177	273345	1	157.634
scaffold_124	265107	1	160.746
scaffold_124	43880	1	161.369
scaffold_308	236486	1	163.876
scaffold_80	185111	1	167.668
scaffold_80	421386	1	169.41
scaffold_80	421361	1	169.41
scaffold_80	424812	1	169.41
scaffold_300	37286	1	171.65
scaffold_300	37344	1	171.65
scaffold_300	140786	1	172.448
scaffold_54	37521	1	174.28
scaffold_300	244294	1	174.28
scaffold_300	244358	1	174.28
scaffold_300	244278	1	174.28
scaffold_300	237394	1	174.28
scaffold_54	37501	1	174.28
scaffold_54	86746	1	175.07
scaffold_54	118273	1	175.691
scaffold_54	118283	1	175.691
scaffold_54	168841	1	176.357
scaffold_54	394918	1	176.357
scaffold_56	157539	1	177.163
scaffold_56	134146	1	177.163
scaffold_56	89328	1	177.163
scaffold_56	272384	1	177.928
scaffold_457	42831	1	179.668
scaffold_613	100406	1	182.671
scaffold_1542	3723	1	182.671
scaffold_613	88319	1	182.671
scaffold_457	118698	1	182.671
scaffold_342	201290	1	187.033
scaffold_1190	4739	1	187.033
scaffold_129	169896	1	189.395
scaffold_165	269318	1	189.395
scaffold_165	269290	1	189.395
scaffold_129	288042	1	190.828
scaffold_1190	6618	1	190.828
scaffold_107	281529	1	193.391
scaffold_107	350566	1	193.391
scaffold_107	169102	1	193.391
scaffold_107	238062	1	193.391
scaffold_107	266188	1	193.391
scaffold_107	266161	1	193.391
scaffold_29	624	1	193.391
scaffold_129	231434	1	193.391
scaffold_426	112423	1	193.391
scaffold_1190	4757	1	205.488
scaffold_107	75414	1	205.488
scaffold_29	297086	1	212.628
scaffold_29	200213	1	212.628
scaffold_707	23270	1	214.794
scaffold_29	518707	1	214.794
scaffold_198	298885	1	217.061
scaffold_32	322150	1	221.712
scaffold_32	456093	1	221.712
scaffold_43	475846	1	228.531
scaffold_64	240789	1	228.531
scaffold_43	395964	1	228.531
scaffold_64	198305	1	228.531
scaffold_64	198327	1	228.531
scaffold_41	160458	1	228.531
scaffold_41	120121	1	228.531
scaffold_41	187449	1	228.531
scaffold_41	421989	1	228.531
scaffold_198	27982	1	228.531
scaffold_198	189519	1	228.531
scaffold_198	200474	1	228.531
scaffold_198	200520	1	228.531
scaffold_29	371099	1	228.531
scaffold_29	84733	1	245.312
scaffold_29	84734	1	245.312
scaffold_29	207027	1	248.453
scaffold_29	207054	1	248.453
scaffold_29	297120	1	248.453
scaffold_29	207011	1	248.453
scaffold_29	443890	1	250.318
scaffold_198	265617	1	250.318
scaffold_29	384043	1	250.318
scaffold_707	23220	1	251.877
scaffold_29	511687	1	251.877
scaffold_29	511674	1	251.877
scaffold_198	298858	1	252.61
scaffold_198	298804	1	252.61
scaffold_198	298879	1	252.61
scaffold_198	298866	1	252.61
scaffold_198	298859	1	252.61
scaffold_198	298871	1	252.61
scaffold_198	298809	1	252.61
scaffold_198	298765	1	252.61
scaffold_198	298777	1	252.61
scaffold_198	298787	1	252.61
scaffold_198	200511	1	253.853
scaffold_198	63469	1	254.588
scaffold_43	437417	1	255.425
scaffold_198	23188	1	255.425
scaffold_43	246725	1	255.425
scaffold_43	18167	1	256.301
scaffold_1168	32236	1	256.301
scaffold_64	64899	1	256.301
scaffold_43	155311	1	256.301
scaffold_64	64874	1	256.301
scaffold_64	322235	1	256.301
scaffold_64	240794	1	256.301
scaffold_32	469383	1	259.044
scaffold_32	320310	1	259.044
scaffold_32	459098	1	259.044
scaffold_41	37869	1	261.456
scaffold_64	428812	1	261.456
scaffold_64	433388	1	261.456
scaffold_41	187457	1	262.38
scaffold_41	422031	1	262.38
scaffold_339	163325	1	266.713
scaffold_339	163340	1	266.713
scaffold_32	31185	1	266.713
scaffold_339	172757	1	266.713
scaffold_118	219758	1	270.778
scaffold_118	102798	1	271.65
scaffold_55	50395	1	274.74
scaffold_55	20283	1	274.74
scaffold_55	24994	1	274.74
scaffold_55	25030	1	274.74
scaffold_55	89743	1	274.74
scaffold_55	290667	1	274.74
scaffold_55	290637	1	274.74
scaffold_55	290666	1	274.74
scaffold_766	66446	1	275.496
scaffold_92	35329	1	275.496
scaffold_92	135068	1	275.496
scaffold_92	313753	1	276.527
scaffold_92	386117	1	279.099
scaffold_179	113918	1	281.781
scaffold_179	113875	1	281.781
scaffold_179	42382	1	282.402
scaffold_421	39565	1	283.726
scaffold_179	62996	1	283.726
scaffold_71	88493	1	284.942
scaffold_71	88492	1	284.942
scaffold_59	964	1	286.77
scaffold_59	921	1	286.77
scaffold_71	304294	1	286.77
scaffold_59	8742	1	286.77
scaffold_71	270739	1	286.77
scaffold_71	270723	1	286.77
scaffold_59	958	1	286.77
scaffold_59	940	1	286.77
scaffold_59	942	1	286.77
scaffold_421	61355	1	286.77
scaffold_59	77616	1	288.636
scaffold_59	144692	1	289.912
scaffold_59	130339	1	289.912
scaffold_59	192755	1	292.006
scaffold_59	220420	1	292.006
scaffold_59	229424	1	292.006
scaffold_59	220416	1	292.006
scaffold_59	192784	1	292.006
scaffold_59	192747	1	292.006
scaffold_59	192748	1	292.006
scaffold_59	260991	1	292.006
scaffold_59	229452	1	292.006
scaffold_59	288364	1	295.046
scaffold_59	346610	1	298.533
scaffold_59	436795	1	298.533
scaffold_59	390964	1	298.533
scaffold_160	163601	1	298.533
scaffold_160	240338	1	298.533
scaffold_59	443313	1	298.533
scaffold_160	222882	1	298.533
scaffold_160	96914	1	298.533
scaffold_59	346643	1	298.533
scaffold_59	346676	1	298.533
scaffold_59	351266	1	298.533
scaffold_147	195320	1	302.941
scaffold_100	311084	1	311.438
scaffold_100	311039	1	311.438
scaffold_100	306422	1	311.438
scaffold_100	306473	1	311.438
scaffold_384	194836	1	311.438
scaffold_100	329575	1	311.438
scaffold_100	199917	1	314.378
scaffold_100	200289	1	314.378
scaffold_100	200345	1	314.378
scaffold_100	199877	1	314.378
scaffold_100	116196	1	316.877
scaffold_100	116176	1	316.877
scaffold_100	50652	1	316.877
scaffold_763	26859	1	318.636
scaffold_763	59339	1	318.636
scaffold_236	31459	1	318.636
scaffold_763	35734	1	318.636
scaffold_236	177882	1	319.961
scaffold_236	189928	1	319.961
scaffold_236	177854	1	319.961
scaffold_236	92136	1	319.961
scaffold_236	189932	1	319.961
scaffold_167	318353	1	320.932
scaffold_167	285900	1	320.932
scaffold_167	311986	1	320.932
scaffold_167	61900	1	323.079
scaffold_428	88948	1	327.652
scaffold_225	139978	1	327.652
scaffold_1368	25974	1	327.652
scaffold_225	56842	1	329.909
scaffold_519	34977	1	331.489
scaffold_492	117540	1	331.489
scaffold_1005	20672	1	331.489
scaffold_492	84049	1	331.489
scaffold_1395	11322	1	331.489
scaffold_730	50935	1	331.489
scaffold_215	199608	1	332.959
scaffold_258	180111	1	334.169
scaffold_258	259676	1	334.169
scaffold_133	262044	1	337.079
scaffold_215	20112	1	337.079
scaffold_133	65158	1	337.079
scaffold_811	949	1	337.079
scaffold_133	44097	1	337.079
scaffold_133	44088	1	337.079
scaffold_215	47982	1	337.079
scaffold_730	61999	1	337.079
scaffold_133	296609	1	337.079
scaffold_133	262030	1	337.079
scaffold_133	262054	1	337.079
scaffold_1038	33134	1	337.079
scaffold_1536	17713	1	337.079
scaffold_2411	1663	1	337.079
scaffold_133	262024	1	337.079
scaffold_215	20121	1	337.079
scaffold_258	246891	1	340.389
scaffold_248	178263	1	340.389
scaffold_258	246887	1	340.389
scaffold_248	129772	1	340.389
scaffold_258	234401	1	340.389
scaffold_258	246922	1	340.389
scaffold_248	68512	1	342.708
scaffold_344	127510	1	342.708
scaffold_344	127489	1	342.708
scaffold_344	173148	1	342.708
scaffold_248	57466	1	342.708
scaffold_248	68476	1	342.708
scaffold_248	161732	1	342.708
scaffold_344	153954	1	342.708
scaffold_248	161741	1	342.708
scaffold_344	113484	1	344.607
scaffold_344	113545	1	344.607
scaffold_344	97462	1	345.988
scaffold_424	18707	1	345.988
scaffold_424	114168	1	345.988
scaffold_424	159153	1	345.988
scaffold_424	100078	1	345.988
scaffold_344	97385	1	345.988
scaffold_344	49776	1	345.988
scaffold_424	38143	1	345.988
scaffold_424	159121	1	345.988
scaffold_642	26005	1	346.643
scaffold_513	47062	1	346.643
scaffold_513	76141	1	346.643
scaffold_513	47024	1	346.643
scaffold_513	51413	1	346.643
scaffold_508	35598	1	348.513
scaffold_508	35597	1	348.513
scaffold_508	109044	1	349.76
scaffold_508	90912	1	349.76
scaffold_508	85857	1	349.76
scaffold_508	90911	1	349.76
scaffold_190	232753	1	350.382
scaffold_190	296546	1	350.382
scaffold_190	232800	1	350.382
scaffold_190	232750	1	350.382
scaffold_190	312944	1	350.382
scaffold_190	312924	1	350.382
scaffold_190	312943	1	350.382
scaffold_190	255506	1	350.382
scaffold_190	312937	1	350.382
scaffold_190	216755	1	351.624
scaffold_190	173941	1	352.308
scaffold_190	128274	1	353.025
scaffold_190	113198	1	353.025
scaffold_190	29735	1	353.75
scaffold_97	15525	1	354.501
scaffold_97	111390	1	355.308
scaffold_97	111442	1	355.308
scaffold_97	150095	1	356.044
scaffold_97	148839	1	356.044
scaffold_97	149726	1	356.044
scaffold_97	179943	1	356.665
scaffold_97	175793	1	356.665
scaffold_97	263915	1	359.216
scaffold_97	311186	1	359.901
scaffold_97	311172	1	359.901
scaffold_97	382472	1	361.143
scaffold_97	332730	1	361.143
scaffold_97	332766	1	361.143
scaffold_97	382474	1	361.143
scaffold_15	186944	1	363.425
scaffold_15	226479	1	363.425
scaffold_15	186975	1	363.425
scaffold_15	186955	1	363.425
scaffold_15	186970	1	363.425
scaffold_15	209737	1	363.425
scaffold_15	187533	1	363.425
scaffold_15	263410	1	363.425
scaffold_15	175887	1	363.425
scaffold_15	175889	1	363.425
scaffold_15	70397	1	363.425
scaffold_15	451156	1	365.645
scaffold_15	451135	1	365.645
scaffold_15	470629	1	365.645
scaffold_15	646358	1	367.893
scaffold_283	193271	1	369.735
scaffold_150	98250	1	369.735
scaffold_150	272189	1	369.735
scaffold_283	139346	1	369.735
scaffold_150	97061	1	369.735
scaffold_283	93367	1	369.735
scaffold_283	93431	1	369.735
scaffold_283	139322	1	369.735
scaffold_283	93421	1	369.735
scaffold_283	86078	1	370.404
scaffold_283	43409	1	370.404
scaffold_150	259242	1	371.055
scaffold_150	259249	1	371.055
scaffold_150	259255	1	371.055
scaffold_150	259234	1	371.055
scaffold_90	69898	1	372.927
scaffold_90	69895	1	372.927
scaffold_90	69883	1	372.927
scaffold_90	189451	1	374.366
scaffold_90	290045	1	374.366
scaffold_90	289963	1	375.248
scaffold_90	263132	1	375.248
scaffold_90	289995	1	375.248
scaffold_94	17088	1	376.581
scaffold_94	208662	1	379.775
scaffold_94	208687	1	379.775
scaffold_94	244000	1	380.593
scaffold_805	3656	1	381.472
scaffold_37	431845	1	381.472
scaffold_94	382757	1	381.472
scaffold_37	431808	1	381.472
scaffold_94	328268	1	381.472
scaffold_37	242395	1	381.472
scaffold_805	32607	1	381.472
scaffold_94	328233	1	381.472
scaffold_37	79337	1	382.36
scaffold_37	79386	1	382.36
scaffold_37	158350	1	382.36
scaffold_496	90310	1	384.386
scaffold_1485	15245	1	384.386
scaffold_1485	15283	1	384.386
scaffold_1485	15284	1	384.386
scaffold_288	98499	1	384.386
scaffold_37	16654	1	384.386
scaffold_850	26452	1	384.386
scaffold_496	44339	1	386.118
scaffold_496	44358	1	386.118
scaffold_73	218201	1	386.829
scaffold_73	218173	1	386.829
scaffold_73	225640	1	386.829
scaffold_73	134884	1	387.532
scaffold_73	123446	1	387.532
scaffold_73	123439	1	387.532
scaffold_73	99788	1	387.532
scaffold_73	123431	1	387.532
scaffold_73	35981	1	387.532
scaffold_73	35650	1	387.532
scaffold_73	123440	1	387.532
scaffold_514	38089	1	387.532
scaffold_514	25393	1	389.035
scaffold_252	114614	1	391.428
scaffold_252	157098	1	391.428
scaffold_252	177259	1	391.428
scaffold_252	112273	1	391.428
scaffold_252	177260	1	391.428
scaffold_252	66472	1	391.428
scaffold_252	209399	1	391.428
scaffold_252	66463	1	391.428
scaffold_252	209402	1	391.428
scaffold_72	218456	1	395.376
scaffold_72	218449	1	395.376
scaffold_72	70081	1	395.376
scaffold_72	207321	1	395.376
scaffold_72	96389	1	395.376
scaffold_72	238124	1	398.018
scaffold_72	269418	1	398.018
scaffold_72	253134	1	398.018
scaffold_58	51498	1	399.817
scaffold_58	61208	1	402.485
scaffold_58	418180	1	403.984
scaffold_58	198206	1	403.984
scaffold_632	72335	1	407.241
scaffold_91	100872	1	409.644
scaffold_91	100860	1	409.644
scaffold_593	32004	1	415.469
scaffold_102	304562	1	417.671
scaffold_102	250149	1	419.251
scaffold_102	72378	1	421.427
scaffold_267	41183	1	421.427
scaffold_102	81646	1	421.427
scaffold_267	73181	1	421.427
scaffold_267	44878	1	421.427
scaffold_267	73201	1	421.427
scaffold_102	72356	1	421.427
scaffold_102	48375	1	421.427
scaffold_102	81603	1	421.427
scaffold_267	146305	1	422.472
scaffold_267	151035	1	422.472
scaffold_18	398604	1	424.907
scaffold_18	312332	1	428.608
scaffold_63	84189	1	436.101
scaffold_63	117416	1	442.334
scaffold_63	305834	1	443.475
scaffold_63	255737	1	443.475
scaffold_63	305888	1	443.475
scaffold_63	321704	1	443.475
scaffold_63	293449	1	444.611
scaffold_63	430894	1	446.885
scaffold_114	331010	1	447.817
scaffold_114	286387	1	447.817
scaffold_114	331040	1	447.817
scaffold_143	27819	1	450.852
scaffold_143	116285	1	450.852
scaffold_143	50106	1	450.852
scaffold_114	24487	1	450.852
scaffold_143	198777	1	453.546
scaffold_143	259321	1	455.099
scaffold_195	139167	1	459.241
scaffold_195	209780	1	459.241
scaffold_163	135998	1	463.169
scaffold_380	199262	1	466.523
scaffold_309	79343	2	0
scaffold_309	79301	2	0
scaffold_276	240441	2	9.34663
scaffold_1665	16316	2	17.7109
scaffold_825	71481	2	17.7109
scaffold_2101	3224	2	17.7109
scaffold_1160	28670	2	29.3816
scaffold_1772	6732	2	29.3816
scaffold_1160	28661	2	29.3816
scaffold_468	14441	2	29.3816
scaffold_1807	10549	2	38.6507
scaffold_468	10960	2	38.6507
scaffold_502	81883	2	49.0267
scaffold_265	144652	2	76.7095
scaffold_265	144667	2	76.7095
scaffold_1314	8273	2	77.6387
scaffold_1314	9456	2	77.6387
scaffold_1314	9373	2	77.6387
scaffold_1314	8271	2	77.6387
scaffold_571	21912	2	90.6499
scaffold_304	95006	2	95.588
scaffold_105	288266	2	95.588
scaffold_105	252410	2	95.588
scaffold_797	67148	2	95.588
scaffold_456	142767	2	95.588
scaffold_105	63342	2	95.588
scaffold_105	63351	2	95.588
scaffold_105	132057	2	95.588
scaffold_105	367493	2	95.588
scaffold_105	367517	2	95.588
scaffold_105	367498	2	95.588
scaffold_239	60560	2	99.4521
scaffold_239	60587	2	99.4521
scaffold_239	60551	2	99.4521
scaffold_239	191327	2	99.4521
scaffold_268	178316	2	99.4521
scaffold_218	38328	2	99.4521
scaffold_268	64374	2	99.4521
scaffold_83	303393	2	101.716
scaffold_19	302936	2	103.819
scaffold_19	115482	2	103.819
scaffold_804	11748	2	103.819
scaffold_19	496428	2	103.819
scaffold_19	449599	2	103.819
scaffold_83	377886	2	103.819
scaffold_19	444507	2	103.819
scaffold_804	24342	2	105.892
scaffold_804	24371	2	105.892
scaffold_88	358826	2	108.802
scaffold_615	47468	2	108.802
scaffold_941	16775	2	108.802
scaffold_615	107753	2	108.802
scaffold_806	2566	2	108.802
scaffold_533	47330	2	112.22
scaffold_533	105353	2	113.079
scaffold_533	101586	2	113.079
scaffold_214	293580	2	114.321
scaffold_93	14989	2	114.321
scaffold_214	43027	2	114.321
scaffold_93	116745	2	114.321
scaffold_93	14935	2	114.321
scaffold_93	235558	2	115.7
scaffold_235	243197	2	119.005
scaffold_235	243203	2	119.005
scaffold_235	243204	2	119.005
scaffold_460	57033	2	119.005
scaffold_23	474120	2	119.005
scaffold_460	57010	2	119.005
scaffold_235	157341	2	119.005
scaffold_23	563242	2	119.005
scaffold_460	125949	2	119.005
scaffold_23	449817	2	122.249
scaffold_23	449795	2	122.249
scaffold_23	352080	2	124.086
scaffold_79	218854	2	128.445
scaffold_79	306590	2	130.698
scaffold_3	207375	2	132.841
scaffold_3	525725	2	134.316
scaffold_3	632624	2	134.316
scaffold_3	632600	2	134.316
scaffold_3	791258	2	136.926
scaffold_3	713745	2	136.926
scaffold_538	50240	2	139.812
scaffold_330	3682	2	139.812
scaffold_330	3708	2	139.812
scaffold_3	658638	2	145.352
scaffold_3	595376	2	145.352
scaffold_3	642854	2	145.352
scaffold_3	583515	2	158.328
scaffold_3	728368	2	161.416
scaffold_3	867478	2	161.416
scaffold_3	777648	2	161.416
scaffold_3	728370	2	161.416
scaffold_973	3120	2	162.317
scaffold_973	3097	2	162.317
scaffold_697	21016	2	162.317
scaffold_330	217704	2	162.939
scaffold_338	69753	2	171.234
scaffold_338	69725	2	171.234
scaffold_125	130710	2	171.234
scaffold_997	23698	2	181.344
scaffold_788	69289	2	181.344
scaffold_997	20461	2	181.344
scaffold_788	69311	2	181.344
scaffold_788	70575	2	181.344
scaffold_788	69290	2	181.344
scaffold_788	70597	2	181.344
scaffold_788	50508	2	181.344
scaffold_800	8792	2	181.344
scaffold_800	8827	2	181.344
scaffold_1161	13548	2	181.344
scaffold_156	6653	2	187.783
scaffold_368	13157	2	187.783
scaffold_156	6670	2	187.783
scaffold_156	106035	2	187.783
scaffold_36	186071	2	190.008
scaffold_36	203965	2	190.008
scaffold_36	200405	2	190.008
scaffold_36	386335	2	190.008
scaffold_36	374419	2	190.008
scaffold_36	386353	2	190.008
scaffold_36	317757	2	190.008
scaffold_36	207991	2	190.008
scaffold_36	374477	2	190.008
scaffold_36	262081	2	190.008
scaffold_36	208058	2	190.008
scaffold_36	186731	2	190.008
scaffold_170	30626	2	193.425
scaffold_170	280948	2	193.425
scaffold_548	128656	2	194.972
scaffold_548	128654	2	194.972
scaffold_548	128652	2	194.972
scaffold_548	128667	2	194.972
scaffold_295	25239	2	202.041
scaffold_431	168007	2	202.041
scaffold_295	25316	2	202.041
scaffold_295	83661	2	202.041
scaffold_125	11386	2	202.842
scaffold_1152	23238	2	209.717
scaffold_856	53088	2	210.361
scaffold_1380	1446	2	210.361
scaffold_856	53086	2	210.361
scaffold_769	55401	2	210.361
scaffold_787	71553	2	211.626
scaffold_538	95125	2	212.44
scaffold_1635	4497	2	213.303
scaffold_1635	4437	2	213.303
scaffold_1635	4422	2	213.303
scaffold_3	405870	2	218.988
scaffold_3	207361	2	220.632
scaffold_79	216332	2	225.701
scaffold_79	208841	2	225.701
scaffold_3	145570	2	225.701
scaffold_79	325216	2	225.701
scaffold_79	141476	2	229.068
scaffold_79	80881	2	229.068
scaffold_79	59445	2	229.068
scaffold_79	118340	2	229.068
scaffold_174	61143	2	230.864
scaffold_174	309348	2	232.317
scaffold_174	309329	2	232.317
scaffold_174	308033	2	232.317
scaffold_832	5393	2	232.317
scaffold_832	39673	2	233.755
scaffold_17	361557	2	234.876
scaffold_17	361633	2	234.876
scaffold_17	293163	2	235.497
scaffold_17	267081	2	235.497
scaffold_17	293222	2	235.497
scaffold_17	164735	2	236.118
scaffold_17	131381	2	236.118
scaffold_17	82438	2	236.118
scaffold_23	270589	2	236.85
scaffold_23	126013	2	236.85
scaffold_23	115344	2	236.85
scaffold_23	126004	2	236.85
scaffold_23	458161	2	238.825
scaffold_235	243159	2	240.912
scaffold_968	46127	2	240.912
scaffold_23	563288	2	240.912
scaffold_460	125892	2	240.912
scaffold_235	157352	2	240.912
scaffold_93	366537	2	243.081
scaffold_93	366506	2	243.081
scaffold_93	189971	2	245.694
scaffold_385	162753	2	245.694
scaffold_214	241931	2	247.341
scaffold_214	161169	2	247.341
scaffold_1058	28179	2	247.341
scaffold_385	89326	2	247.341
scaffold_533	47955	2	250.761
scaffold_615	47523	2	254.494
scaffold_615	20784	2	254.494
scaffold_615	20805	2	254.494
scaffold_615	47508	2	254.494
scaffold_615	100375	2	254.494
scaffold_461	55533	2	255.737
scaffold_461	55534	2	255.737
scaffold_804	11782	2	255.737
scaffold_804	32495	2	258.104
scaffold_804	32485	2	258.104
scaffold_19	105042	2	262.213
scaffold_443	108259	2	262.213
scaffold_443	108261	2	262.213
scaffold_83	355355	2	262.213
scaffold_83	354567	2	262.213
scaffold_83	94134	2	265.05
scaffold_218	38356	2	266.382
scaffold_268	182752	2	266.382
scaffold_218	38290	2	266.382
scaffold_239	31921	2	266.382
scaffold_239	56028	2	266.382
scaffold_239	115195	2	266.382
scaffold_239	243888	2	266.382
scaffold_268	69117	2	266.382
scaffold_83	58792	2	266.382
scaffold_268	182757	2	266.382
scaffold_239	115180	2	266.382
scaffold_797	58926	2	268.11
scaffold_304	57382	2	270.734
scaffold_304	71194	2	270.734
scaffold_105	63294	2	270.734
scaffold_304	57445	2	270.734
scaffold_304	136527	2	270.734
scaffold_859	39652	2	270.734
scaffold_304	39482	2	270.734
scaffold_304	71195	2	270.734
scaffold_571	9224	2	272.287
scaffold_571	109101	2	273.953
scaffold_82	104439	2	275.675
scaffold_82	44016	2	275.675
scaffold_82	43983	2	275.675
scaffold_82	108903	2	275.675
scaffold_82	108914	2	275.675
scaffold_82	296433	2	276.887
scaffold_82	154357	2	276.887
scaffold_82	154309	2	276.887
scaffold_265	157183	2	280.038
scaffold_265	200540	2	281.163
scaffold_1314	9380	2	281.908
scaffold_491	61155	2	284.013
scaffold_839	24626	2	284.013
scaffold_839	59627	2	284.013
scaffold_839	59623	2	284.013
scaffold_502	28521	2	284.013
scaffold_589	109255	2	286.238
scaffold_1148	3556	2	288.461
scaffold_1172	35252	2	290.663
scaffold_880	8898	2	294.739
scaffold_880	8885	2	294.739
scaffold_1037	5662	2	294.739
scaffold_1624	12585	2	296.319
scaffold_1624	12573	2	296.319
scaffold_1160	28649	2	296.319
scaffold_1624	17771	2	300.633
scaffold_166	293424	2	308.099
scaffold_305	173166	2	310.488
scaffold_305	173199	2	310.488
scaffold_305	162035	2	310.488
scaffold_1435	7301	2	311.56
scaffold_1492	10675	2	311.56
scaffold_375	156259	2	313.286
scaffold_375	156276	2	313.286
scaffold_375	201936	2	313.286
scaffold_472	107330	2	313.286
scaffold_270	213697	2	313.286
scaffold_292	182001	2	314.416
scaffold_825	73012	2	314.416
scaffold_629	16115	2	314.416
scaffold_472	83945	2	314.416
scaffold_472	83981	2	314.416
scaffold_957	30682	2	314.416
scaffold_629	80393	2	314.416
scaffold_292	229389	2	314.416
scaffold_497	16562	2	315.329
scaffold_226	31635	2	315.329
scaffold_825	71524	2	316.244
scaffold_807	60983	2	317.164
scaffold_846	52640	2	317.164
scaffold_226	230134	2	317.164
scaffold_1473	15781	2	318.78
scaffold_408	159617	2	319.777
scaffold_628	22292	2	319.777
scaffold_564	105500	2	322.477
scaffold_564	105568	2	322.477
scaffold_507	3298	2	324.816
scaffold_507	3220	2	324.816
scaffold_507	3271	2	324.816
scaffold_309	203167	2	324.816
scaffold_309	203206	2	324.816
scaffold_309	203171	2	324.816
scaffold_309	203198	2	324.816
scaffold_507	77245	2	324.816
scaffold_309	157055	2	324.816
scaffold_309	157037	2	324.816
scaffold_309	185374	2	326.231
scaffold_309	116029	2	328.489
scaffold_309	35981	2	329.878
scaffold_309	60613	2	329.878
scaffold_309	79347	2	329.878
scaffold_309	79352	2	329.878
scaffold_39	241742	2	333.687
scaffold_39	241690	2	333.687
scaffold_39	81263	2	333.687
scaffold_39	81258	2	333.687
scaffold_39	81262	2	333.687
scaffold_39	81257	2	333.687
scaffold_39	230997	2	333.687
scaffold_39	240385	2	333.687
scaffold_191	86786	2	347.845
scaffold_182	106408	2	356.391
scaffold_182	148141	2	356.391
scaffold_254	109438	2	374.714
scaffold_10	349409	2	394.313
scaffold_10	325942	2	394.313
scaffold_182	192512	2	397.698
scaffold_157	150498	2	400.318
scaffold_10	144477	2	402.775
scaffold_16	491696	2	402.775
scaffold_16	92215	2	402.775
scaffold_16	86319	2	402.775
scaffold_16	492183	2	402.775
scaffold_16	179700	2	402.775
scaffold_10	61939	2	402.775
scaffold_172	66807	2	405.392
scaffold_493	112090	2	405.392
scaffold_60	456173	2	405.392
scaffold_60	34282	2	405.392
scaffold_493	112069	2	405.392
scaffold_60	55362	2	405.392
scaffold_60	55347	2	405.392
scaffold_172	19340	2	405.392
scaffold_84	31257	2	407.696
scaffold_84	48758	2	409.85
scaffold_84	138728	2	412.302
scaffold_84	216458	2	414.222
scaffold_84	216468	2	414.222
scaffold_84	257978	2	416.478
scaffold_254	247676	2	424.615
scaffold_254	236081	2	424.615
scaffold_138	100246	2	424.615
scaffold_254	175363	2	424.615
scaffold_254	141596	2	424.615
scaffold_254	141626	2	424.615
scaffold_254	141586	2	424.615
scaffold_254	170656	2	424.615
scaffold_254	170682	2	424.615
scaffold_445	44350	2	424.615
scaffold_445	54630	2	424.615
scaffold_254	25316	2	424.615
scaffold_254	25260	2	424.615
scaffold_445	45371	2	424.615
scaffold_138	73167	2	426.484
scaffold_138	146629	2	427.416
scaffold_138	277140	2	428.527
scaffold_327	163261	2	430.568
scaffold_327	126867	2	430.568
scaffold_327	126837	2	430.568
scaffold_24	107048	2	431.521
scaffold_24	398929	2	432.451
scaffold_24	361540	2	432.451
scaffold_24	361560	2	432.451
scaffold_24	398890	2	446.134
scaffold_24	398918	2	446.134
scaffold_24	392865	2	446.134
scaffold_24	398886	2	446.134
scaffold_24	392871	2	446.134
scaffold_24	499282	2	446.134
scaffold_24	398877	2	446.134
scaffold_24	398930	2	446.134
scaffold_24	170316	2	446.134
scaffold_24	392903	2	446.134
scaffold_286	237800	2	457.158
scaffold_791	48927	2	465.004
scaffold_791	48921	2	465.004
scaffold_245	41332	2	465.909
scaffold_245	199345	2	465.909
scaffold_245	41349	2	465.909
scaffold_245	199349	2	465.909
scaffold_245	199304	2	465.909
scaffold_422	173604	2	466.543
scaffold_231	214164	2	467.164
scaffold_245	204464	2	467.164
scaffold_231	135159	2	467.164
scaffold_231	135127	2	467.164
scaffold_303	220055	2	467.164
scaffold_303	94447	2	469.028
scaffold_303	22267	2	469.028
scaffold_303	107483	2	469.028
scaffold_231	185585	2	476.384
scaffold_303	65301	2	478.731
scaffold_303	5209	2	479.941
scaffold_303	8362	2	479.941
scaffold_303	5210	2	479.941
scaffold_303	34269	2	479.941
scaffold_430	172886	2	481.342
scaffold_865	58626	2	484.488
scaffold_972	31311	2	484.488
scaffold_430	57869	2	486.987
scaffold_430	172923	2	493.974
scaffold_430	87952	2	493.974
scaffold_1470	21285	2	493.974
scaffold_430	87931	2	493.974
scaffold_430	87946	2	493.974
scaffold_1050	40049	2	496.474
scaffold_1050	18050	2	496.474
scaffold_829	57330	2	497.124
scaffold_829	27729	2	497.773
scaffold_865	37737	2	497.773
scaffold_829	27759	2	497.773
scaffold_829	27311	2	497.773
scaffold_101	323514	2	498.401
scaffold_101	43149	2	498.401
scaffold_1519	21396	2	498.401
scaffold_101	320623	2	498.401
scaffold_972	55736	2	498.401
scaffold_101	323545	2	498.401
scaffold_101	43182	2	498.401
scaffold_101	349504	2	498.401
scaffold_101	269828	2	498.401
scaffold_1977	8215	2	498.401
scaffold_972	20172	2	498.401
scaffold_1354	8850	2	498.401
scaffold_889	33667	2	499.643
scaffold_889	33662	2	499.643
scaffold_622	57146	2	502.552
scaffold_873	13175	2	502.552
scaffold_622	82005	2	502.552
scaffold_645	41020	2	502.552
scaffold_645	40203	2	502.552
scaffold_465	43779	2	502.552
scaffold_465	43735	2	502.552
scaffold_688	34656	2	502.552
scaffold_688	34659	2	502.552
scaffold_688	34717	2	502.552
scaffold_688	9817	2	502.552
scaffold_698	2981	2	502.552
scaffold_1703	16369	2	504.198
scaffold_1000	3421	2	504.198
scaffold_1703	16343	2	504.198
scaffold_1703	16361	2	504.198
scaffold_1000	50582	2	504.198
scaffold_465	154555	2	504.198
scaffold_719	43633	2	505.743
scaffold_584	58492	2	506.551
scaffold_537	121538	2	511.29
scaffold_537	111233	2	511.29
scaffold_1020	31372	2	514.514
scaffold_1020	25260	2	514.514
scaffold_1020	25276	2	514.514
scaffold_1410	27687	2	516.543
scaffold_480	84911	2	519.783
scaffold_230	35495	2	519.783
scaffold_573	118633	2	519.783
scaffold_230	59544	2	519.783
scaffold_230	475	2	519.783
scaffold_230	96432	2	520.418
scaffold_230	96473	2	520.418
scaffold_120	318473	2	521.66
scaffold_718	77616	2	521.66
scaffold_120	29855	2	522.312
scaffold_120	162707	2	522.312
scaffold_578	31263	2	523.031
scaffold_578	47465	2	523.031
scaffold_321	234086	2	530.617
scaffold_405	46797	2	531.86
scaffold_45	292919	2	531.86
scaffold_45	324420	2	531.86
scaffold_45	292886	2	531.86
scaffold_45	324407	2	531.86
scaffold_405	46795	2	531.86
scaffold_405	43548	2	531.86
scaffold_45	324438	2	531.86
scaffold_405	46749	2	531.86
scaffold_405	62859	2	531.86
scaffold_45	86825	2	535.133
scaffold_45	13937	2	536.912
scaffold_188	63747	2	539.689
scaffold_188	137573	2	540.576
scaffold_188	97219	2	540.576
scaffold_188	278798	2	542.86
scaffold_188	266578	2	542.86
scaffold_188	266606	2	542.86
scaffold_188	285825	2	542.86
scaffold_34	167150	2	545.827
scaffold_34	537645	2	545.827
scaffold_47	121255	2	545.827
scaffold_47	121253	2	545.827
scaffold_34	348464	2	545.827
scaffold_47	466143	2	545.827
scaffold_34	126820	2	545.827
scaffold_47	482123	2	545.827
scaffold_47	121259	2	545.827
scaffold_47	121257	2	545.827
scaffold_34	126833	2	545.827
scaffold_47	494044	2	545.827
scaffold_541	4847	3	0
scaffold_474	126039	3	0
scaffold_474	48428	3	0
scaffold_474	48422	3	0
scaffold_474	48425	3	0
scaffold_319	162327	3	6.12043
scaffold_319	86202	3	6.12043
scaffold_580	50396	3	6.12043
scaffold_474	28674	3	8.16373
scaffold_474	39494	3	8.16373
scaffold_592	92187	3	8.16373
scaffold_503	1860	3	8.78608
scaffold_834	52959	3	9.40844
scaffold_834	49286	3	10.0296
scaffold_834	48816	3	10.0296
scaffold_834	48793	3	10.0296
scaffold_834	29147	3	10.0296
scaffold_1004	50993	3	13.9127
scaffold_1004	50970	3	13.9127
scaffold_1004	50942	3	13.9127
scaffold_449	112330	3	20.5755
scaffold_449	112259	3	20.5755
scaffold_131	75365	3	20.5755
scaffold_1572	6601	3	22.1906
scaffold_970	40865	3	23.1379
scaffold_419	147092	3	23.9794
scaffold_1247	13986	3	24.8041
scaffold_370	8384	3	28.1053
scaffold_370	140778	3	28.7565
scaffold_370	161916	3	28.7565
scaffold_370	140816	3	28.7565
scaffold_370	161857	3	28.7565
scaffold_370	140797	3	28.7565
scaffold_370	88841	3	28.7565
scaffold_401	33710	3	29.3777
scaffold_401	33712	3	29.3777
scaffold_401	83524	3	29.3777
scaffold_401	83500	3	29.3777
scaffold_14	126931	3	30.6647
scaffold_14	248628	3	32.1054
scaffold_14	342037	3	34.5863
scaffold_14	525252	3	36.0274
scaffold_14	595320	3	38.6911
scaffold_715	35726	3	46.1738
scaffold_715	35742	3	46.1738
scaffold_678	119041	3	53.1805
scaffold_678	119116	3	53.1805
scaffold_672	18607	3	53.1805
scaffold_672	72935	3	53.1805
scaffold_672	72905	3	53.1805
scaffold_672	18587	3	53.1805
scaffold_672	18616	3	53.1805
scaffold_331	162810	3	62.8589
scaffold_328	127569	3	62.8589
scaffold_331	135669	3	62.8589
scaffold_331	135722	3	62.8589
scaffold_331	135674	3	62.8589
scaffold_331	135714	3	62.8589
scaffold_331	166370	3	62.8589
scaffold_331	166377	3	62.8589
scaffold_331	135723	3	62.8589
scaffold_331	166349	3	62.8589
scaffold_331	135660	3	62.8589
scaffold_331	127727	3	62.8589
scaffold_328	96163	3	62.8589
scaffold_331	127720	3	62.8589
scaffold_331	127761	3	62.8589
scaffold_1526	9606	3	67.5298
scaffold_1526	9607	3	67.5298
scaffold_328	218546	3	67.5298
scaffold_328	218557	3	67.5298
scaffold_1176	22365	3	67.5298
scaffold_328	218531	3	67.5298
scaffold_559	34881	3	70.9713
scaffold_559	81102	3	70.9713
scaffold_427	81397	3	72.0392
scaffold_427	159022	3	72.0392
scaffold_427	179314	3	72.0392
scaffold_427	81331	3	72.0392
scaffold_427	67676	3	72.0392
scaffold_427	19114	3	72.0392
scaffold_9	98469	3	75.4785
scaffold_9	145566	3	75.4785
scaffold_9	108650	3	75.4785
scaffold_9	154024	3	76.1779
scaffold_9	154015	3	76.1779
scaffold_9	198623	3	76.8509
scaffold_9	205711	3	76.8509
scaffold_9	198641	3	76.8509
scaffold_9	286095	3	77.5383
scaffold_9	243032	3	77.5383
scaffold_9	276749	3	77.5383
scaffold_9	217940	3	77.5383
scaffold_9	293736	3	77.5383
scaffold_9	286119	3	77.5383
scaffold_9	270254	3	77.5383
scaffold_9	286090	3	77.5383
scaffold_9	243042	3	77.5383
scaffold_9	315089	3	78.8823
scaffold_9	414021	3	80.1672
scaffold_9	433677	3	80.1672
scaffold_9	390954	3	80.1672
scaffold_9	390960	3	80.1672
scaffold_9	625205	3	81.4363
scaffold_9	648997	3	81.4363
scaffold_9	625221	3	81.4363
scaffold_207	6311	3	82.7267
scaffold_207	8098	3	82.7267
scaffold_207	8062	3	82.7267
scaffold_9	662864	3	82.7267
scaffold_207	6270	3	82.7267
scaffold_9	663349	3	82.7267
scaffold_207	42395	3	82.7267
scaffold_9	663360	3	82.7267
scaffold_207	6318	3	82.7267
scaffold_171	269881	3	83.425
scaffold_171	269899	3	83.425
scaffold_171	269890	3	83.425
scaffold_171	107274	3	84.1002
scaffold_171	109591	3	84.1002
scaffold_171	107294	3	84.1002
scaffold_171	110401	3	84.1002
scaffold_171	110384	3	84.1002
scaffold_171	31130	3	85.0859
scaffold_171	68593	3	85.0859
scaffold_830	27208	3	86.0715
scaffold_1015	25162	3	86.0715
scaffold_293	159906	3	86.0715
scaffold_293	156430	3	86.0715
scaffold_884	36992	3	86.0715
scaffold_293	133854	3	86.0715
scaffold_293	176262	3	86.0715
scaffold_293	156452	3	86.0715
scaffold_293	165910	3	86.0715
scaffold_872	69644	3	86.0715
scaffold_293	165867	3	86.0715
scaffold_969	46930	3	86.0715
scaffold_293	133845	3	86.0715
scaffold_293	206089	3	86.0715
scaffold_186	158418	3	86.0715
scaffold_1041	23340	3	86.0715
scaffold_293	159900	3	86.0715
scaffold_1460	12465	3	86.0715
scaffold_293	140388	3	86.0715
scaffold_293	140376	3	86.0715
scaffold_293	18304	3	86.6976
scaffold_293	18324	3	86.6976
scaffold_616	69122	3	86.6976
scaffold_145	86521	3	88.4185
scaffold_155	73608	3	88.4185
scaffold_145	301421	3	88.4185
scaffold_145	86483	3	88.4185
scaffold_611	93841	3	88.4185
scaffold_611	101712	3	88.4185
scaffold_145	301446	3	88.4185
scaffold_3688	662	3	88.4185
scaffold_1225	20638	3	88.4185
scaffold_1225	20588	3	88.4185
scaffold_145	301405	3	88.4185
scaffold_155	73565	3	88.4185
scaffold_145	240900	3	88.4185
scaffold_1424	24775	3	91.6182
scaffold_792	26757	3	91.6182
scaffold_792	47710	3	91.6182
scaffold_1424	24819	3	91.6182
scaffold_914	26510	3	91.6182
scaffold_1952	13751	3	91.6182
scaffold_1952	9472	3	91.6182
scaffold_600	40061	3	91.6182
scaffold_1952	12135	3	91.6182
scaffold_1952	9486	3	91.6182
scaffold_1952	9481	3	91.6182
scaffold_1952	13226	3	91.6182
scaffold_600	40081	3	91.6182
scaffold_1307	3104	3	91.6182
scaffold_155	282521	3	95.3291
scaffold_155	276227	3	95.3291
scaffold_446	89333	3	95.3291
scaffold_155	282480	3	95.3291
scaffold_446	78988	3	95.3291
scaffold_155	282530	3	95.3291
scaffold_155	276245	3	95.3291
scaffold_155	276173	3	95.3291
scaffold_155	282511	3	95.3291
scaffold_155	276246	3	95.3291
scaffold_155	279872	3	95.3291
scaffold_148	113564	3	100.088
scaffold_494	107720	3	100.088
scaffold_494	108654	3	100.088
scaffold_148	72378	3	100.088
scaffold_148	102178	3	100.088
scaffold_494	78624	3	106.58
scaffold_494	51483	3	107.462
scaffold_494	1252	3	108.357
scaffold_494	38361	3	108.357
scaffold_494	38340	3	108.357
scaffold_524	91003	3	109.808
scaffold_494	1211	3	115.451
scaffold_524	119263	3	115.451
scaffold_524	95195	3	116.822
scaffold_320	45759	3	120
scaffold_320	45774	3	120
scaffold_320	45746	3	120
scaffold_320	17192	3	120
scaffold_320	92523	3	121.687
scaffold_320	128119	3	122.645
scaffold_320	187487	3	124.651
scaffold_154	220542	3	125.278
scaffold_154	266117	3	125.278
scaffold_154	85099	3	125.914
scaffold_144	17375	3	125.914
scaffold_154	85154	3	125.914
scaffold_154	85171	3	125.914
scaffold_144	13287	3	132.867
scaffold_117	3753	3	138.173
scaffold_117	3803	3	138.173
scaffold_290	78500	3	140.393
scaffold_290	187655	3	140.393
scaffold_310	227546	3	144.609
scaffold_499	100971	3	144.609
scaffold_1036	15862	3	144.609
scaffold_117	3796	3	154.952
scaffold_290	218507	3	158.531
scaffold_310	83716	3	159.683
scaffold_498	110526	3	159.683
scaffold_498	110543	3	159.683
scaffold_310	83785	3	159.683
scaffold_498	110489	3	159.683
scaffold_607	106892	3	163.679
scaffold_828	47241	3	165.484
scaffold_691	55086	3	165.484
scaffold_908	43591	3	165.484
scaffold_403	177873	3	165.484
scaffold_1158	34063	3	165.484
scaffold_828	29465	3	165.484
scaffold_403	65247	3	165.484
scaffold_311	66699	3	167.952
scaffold_311	66634	3	167.952
scaffold_551	120510	3	167.952
scaffold_402	125670	3	172.795
scaffold_1449	14642	3	174.709
scaffold_484	23897	3	174.709
scaffold_484	122484	3	174.709
scaffold_68	258378	3	178.382
scaffold_68	43325	3	198.162
scaffold_68	43265	3	198.162
scaffold_68	43328	3	198.162
scaffold_68	43304	3	198.162
scaffold_6	531792	3	211.192
scaffold_6	411718	3	211.192
scaffold_6	558054	3	211.192
scaffold_6	411732	3	211.192
scaffold_6	264378	3	226.134
scaffold_6	322442	3	226.134
scaffold_6	273273	3	226.134
scaffold_748	70929	3	227.501
scaffold_68	43257	3	227.501
scaffold_748	36063	3	227.501
scaffold_6	155964	3	228.914
scaffold_6	101523	3	228.914
scaffold_6	182484	3	228.914
scaffold_121	279284	3	231.872
scaffold_31	81683	3	232.514
scaffold_31	81675	3	232.514
scaffold_31	10310	3	232.514
scaffold_31	111264	3	232.514
scaffold_31	182256	3	232.514
scaffold_31	87930	3	232.514
scaffold_31	340357	3	234.097
scaffold_31	389683	3	234.097
scaffold_31	528797	3	234.097
scaffold_31	392163	3	234.097
scaffold_227	229211	3	235.707
scaffold_487	57191	3	235.707
scaffold_175	102322	3	250.821
scaffold_217	203088	3	261.828
scaffold_340	102833	3	261.828
scaffold_550	19904	3	273.424
scaffold_175	270924	3	273.424
scaffold_227	40849	3	273.424
scaffold_175	270935	3	273.424
scaffold_440	48901	3	273.424
scaffold_175	33454	3	273.424
scaffold_356	168293	3	274.052
scaffold_356	177334	3	274.052
scaffold_663	39653	3	275.299
scaffold_663	39604	3	275.299
scaffold_217	134939	3	275.299
scaffold_340	202839	3	275.998
scaffold_349	49193	3	277.319
scaffold_349	49174	3	277.319
scaffold_349	95420	3	277.319
scaffold_808	22751	3	277.319
scaffold_349	49171	3	277.319
scaffold_168	290488	3	278.074
scaffold_168	82321	3	278.828
scaffold_395	175911	3	278.828
scaffold_168	82359	3	278.828
scaffold_395	44184	3	279.449
scaffold_906	43743	3	280.145
scaffold_576	76565	3	280.145
scaffold_232	274280	3	284.434
scaffold_232	93269	3	285.176
scaffold_12	569163	3	285.917
scaffold_12	365673	3	287.691
scaffold_12	13019	3	288.415
scaffold_12	25781	3	288.415
scaffold_127	171782	3	289.091
scaffold_298	8533	3	289.768
scaffold_52	468234	3	290.457
scaffold_52	342814	3	290.457
scaffold_378	93115	3	290.457
scaffold_52	323904	3	291.428
scaffold_52	271703	3	293.244
scaffold_52	271722	3	293.244
scaffold_52	201314	3	294.982
scaffold_52	44882	3	296.578
scaffold_52	56651	3	296.578
scaffold_153	83294	3	298.867
scaffold_87	23559	3	300.183
scaffold_274	128642	3	302.048
scaffold_69	39420	3	302.685
scaffold_69	313911	3	304.832
scaffold_205	296147	3	304.832
scaffold_137	21059	3	304.832
scaffold_69	393233	3	304.832
scaffold_205	21489	3	304.832
scaffold_1308	20986	3	304.832
scaffold_1308	20988	3	304.832
scaffold_623	106372	3	304.832
scaffold_137	21055	3	304.832
scaffold_418	16666	3	306.783
scaffold_418	49708	3	306.783
scaffold_582	93854	3	308.054
scaffold_670	11014	3	310.903
scaffold_899	54048	3	310.903
scaffold_670	11013	3	310.903
scaffold_757	41720	3	312.227
scaffold_757	50853	3	312.227
scaffold_757	7712	3	312.227
scaffold_1270	15138	3	314.705
scaffold_939	46579	3	314.705
scaffold_939	46582	3	314.705
scaffold_737	76822	3	322.669
scaffold_1321	21825	3	326.64
scaffold_989	9481	3	330.086
scaffold_989	13550	3	330.086
scaffold_1464	4561	3	334.79
scaffold_1464	4564	3	334.79
scaffold_1464	4517	3	334.79
scaffold_534	154687	3	339.309
scaffold_534	50564	3	341.878
scaffold_534	17646	3	341.878
scaffold_534	17649	3	341.878
scaffold_534	50558	3	341.878
scaffold_534	50526	3	341.878
scaffold_534	17635	3	341.878
scaffold_534	17609	3	341.878
scaffold_583	116931	3	345.335
scaffold_799	15788	3	345.335
scaffold_583	63419	3	345.335
scaffold_583	44308	3	346.887
scaffold_1362	13136	3	346.887
scaffold_1031	30645	3	348.691
scaffold_689	89308	3	348.691
scaffold_689	97808	3	348.691
scaffold_689	77976	3	348.691
scaffold_96	380815	3	354.005
scaffold_96	370206	3	358.486
scaffold_96	218434	3	361.68
scaffold_567	10675	3	367.392
scaffold_1579	19507	3	371.172
scaffold_1017	12651	3	372.043
scaffold_1216	17474	3	378.481
scaffold_158	94392	3	386.659
scaffold_158	94409	3	386.659
scaffold_158	70077	3	386.659
scaffold_158	32405	3	386.659
scaffold_653	57137	3	393.101
scaffold_601	53538	3	393.101
scaffold_605	13428	4	0
scaffold_112	354183	4	0
scaffold_605	13430	4	0
scaffold_112	51792	4	2.34865
scaffold_202	145893	4	3.28023
scaffold_620	24609	4	4.61124
scaffold_112	38078	4	4.61124
scaffold_620	38309	4	7.13906
scaffold_620	38348	4	7.13906
scaffold_425	151920	4	7.13906
scaffold_459	95102	4	13.4997
scaffold_459	143919	4	13.4997
scaffold_459	94991	4	13.4997
scaffold_434	104799	4	24.1164
scaffold_617	111769	4	32.1131
scaffold_1106	32546	4	36.1929
scaffold_838	9984	4	37.2267
scaffold_506	5193	4	40.7506
scaffold_641	935	4	40.7506
scaffold_2222	16224	4	43.5487
scaffold_1011	33677	4	43.5487
scaffold_1011	20604	4	43.5487
scaffold_759	46329	4	44.4792
scaffold_527	88489	4	46.6638
scaffold_527	130238	4	47.4861
scaffold_429	169365	4	49.943
scaffold_701	5209	4	49.943
scaffold_701	54580	4	49.943
scaffold_701	56999	4	49.943
scaffold_701	54589	4	49.943
scaffold_701	54577	4	49.943
scaffold_701	56170	4	49.943
scaffold_701	57001	4	49.943
scaffold_2036	8082	4	53.8386
scaffold_2036	8084	4	53.8386
scaffold_2036	8111	4	53.8386
scaffold_772	46585	4	54.6915
scaffold_772	51622	4	54.6915
scaffold_753	7807	4	55.4836
scaffold_744	55143	4	56.5023
scaffold_1381	23137	4	56.5023
scaffold_744	36764	4	56.5023
scaffold_1125	32944	4	59.3873
scaffold_1125	32962	4	59.3873
scaffold_1440	2079	4	62.515
scaffold_1462	24397	4	64.399
scaffold_572	76106	4	65.651
scaffold_761	70769	4	66.4049
scaffold_761	70800	4	66.4049
scaffold_761	70782	4	66.4049
scaffold_761	70804	4	66.4049
scaffold_761	70767	4	66.4049
scaffold_1273	34923	4	67.7015
scaffold_1273	34934	4	67.7015
scaffold_1273	34946	4	67.7015
scaffold_1953	9951	4	67.7015
scaffold_1273	11059	4	67.7015
scaffold_1273	11029	4	67.7015
scaffold_1405	8678	4	67.7015
scaffold_733	15536	4	69.5631
scaffold_1405	9111	4	69.5631
scaffold_733	15575	4	69.5631
scaffold_911	50549	4	71.0615
scaffold_911	50552	4	71.0615
scaffold_495	71823	4	75.0757
scaffold_495	71792	4	75.0757
scaffold_495	12131	4	75.6968
scaffold_1980	9744	4	76.9393
scaffold_1980	9739	4	76.9393
scaffold_475	77192	4	77.5749
scaffold_1313	9795	4	78.2206
scaffold_1313	9813	4	78.2206
scaffold_853	33548	4	80.3706
scaffold_504	105702	4	81.2668
scaffold_971	29404	4	81.8881
scaffold_895	3400	4	81.8881
scaffold_895	3456	4	81.8881
scaffold_1078	5788	4	81.8881
scaffold_895	3433	4	81.8881
scaffold_1078	5864	4	81.8881
scaffold_1558	4128	4	81.8881
scaffold_963	48996	4	82.5092
scaffold_1571	8616	4	83.1311
scaffold_1571	8613	4	83.1311
scaffold_1571	3367	4	83.1311
scaffold_665	70960	4	83.7529
scaffold_1024	22219	4	83.7529
scaffold_665	70953	4	83.7529
scaffold_1024	22206	4	83.7529
scaffold_665	57771	4	83.7529
scaffold_1024	22228	4	83.7529
scaffold_416	90414	4	84.3769
scaffold_416	54943	4	84.3769
scaffold_416	54954	4	84.3769
scaffold_416	54919	4	84.3769
scaffold_416	68363	4	84.3769
scaffold_416	133650	4	84.3769
scaffold_371	39690	4	85.001
scaffold_317	48536	4	85.001
scaffold_317	36737	4	85.001
scaffold_317	139067	4	85.001
scaffold_1966	5381	4	85.001
scaffold_827	22273	4	85.6221
scaffold_390	135158	4	85.6221
scaffold_981	20024	4	85.6221
scaffold_390	143816	4	85.6221
scaffold_390	41912	4	85.6221
scaffold_373	169830	4	85.6221
scaffold_721	74145	4	85.6221
scaffold_992	25480	4	86.2441
scaffold_992	25451	4	86.2441
scaffold_992	25467	4	86.2441
scaffold_269	204305	4	87.0624
scaffold_333	197253	4	87.0624
scaffold_634	11269	4	87.0624
scaffold_355	77724	4	87.0624
scaffold_355	183522	4	87.0624
scaffold_333	197204	4	87.0624
scaffold_528	65185	4	89.3327
scaffold_25	428384	4	90.9489
scaffold_25	428360	4	90.9489
scaffold_25	476031	4	90.9489
scaffold_25	346610	4	92.892
scaffold_25	41041	4	92.892
scaffold_25	41032	4	92.892
scaffold_25	40995	4	92.892
scaffold_25	41039	4	92.892
scaffold_25	41008	4	92.892
scaffold_25	41033	4	92.892
scaffold_25	169386	4	93.7005
scaffold_66	289980	4	94.3217
scaffold_25	24143	4	94.3217
scaffold_66	345235	4	94.3217
scaffold_66	286366	4	94.3217
scaffold_66	295458	4	94.3217
scaffold_66	245642	4	94.3217
scaffold_66	249703	4	94.3217
scaffold_66	345236	4	94.3217
scaffold_66	345275	4	94.3217
scaffold_66	286322	4	94.3217
scaffold_66	245376	4	94.3217
scaffold_66	323083	4	94.3217
scaffold_66	84204	4	96.1922
scaffold_66	84254	4	96.1922
scaffold_956	32815	4	98.7404
scaffold_185	186185	4	98.7404
scaffold_185	44363	4	101.661
scaffold_749	62366	4	101.661
scaffold_98	141812	4	102.903
scaffold_98	216916	4	103.542
scaffold_98	360887	4	107.839
scaffold_98	360854	4	107.839
scaffold_98	272010	4	107.839
scaffold_98	272028	4	107.839
scaffold_98	360855	4	107.839
scaffold_98	272118	4	107.839
scaffold_98	360892	4	107.839
scaffold_57	147465	4	114.579
scaffold_57	1751	4	115.2
scaffold_282	174171	4	117.065
scaffold_282	184395	4	117.065
scaffold_40	515183	4	117.686
scaffold_40	457141	4	117.686
scaffold_282	212430	4	117.686
scaffold_40	436193	4	118.309
scaffold_40	173723	4	118.937
scaffold_40	173717	4	118.937
scaffold_40	173645	4	118.937
scaffold_40	92105	4	119.563
scaffold_40	111319	4	119.563
scaffold_40	135120	4	119.563
scaffold_113	44127	4	120.187
scaffold_113	94506	4	122.694
scaffold_183	296378	4	124.421
scaffold_183	255698	4	124.421
scaffold_183	211833	4	126.082
scaffold_183	58197	4	127.731
scaffold_183	222966	4	127.731
scaffold_406	148801	4	129.357
scaffold_1240	17802	4	130.644
scaffold_569	117825	4	130.644
scaffold_569	66334	4	130.644
scaffold_682	30872	4	130.644
scaffold_784	11636	4	131.289
scaffold_1066	33844	4	132.785
scaffold_1356	17904	4	132.785
scaffold_1066	33894	4	132.785
scaffold_1641	13410	4	132.785
scaffold_1066	15383	4	133.965
scaffold_959	23818	4	133.965
scaffold_1135	21267	4	134.635
scaffold_1135	21243	4	134.635
scaffold_1112	1299	4	134.635
scaffold_242	25866	4	135.312
scaffold_242	165524	4	135.312
scaffold_242	165527	4	135.312
scaffold_242	210876	4	136.218
scaffold_89	139418	4	136.218
scaffold_89	120953	4	136.218
scaffold_89	120919	4	136.218
scaffold_42	450774	4	139.426
scaffold_42	450728	4	139.426
scaffold_42	450773	4	139.426
scaffold_42	438560	4	139.426
scaffold_42	450754	4	139.426
scaffold_42	431183	4	140.345
scaffold_42	431233	4	140.345
scaffold_42	71107	4	141.712
scaffold_42	280267	4	141.712
scaffold_42	73521	4	141.712
scaffold_42	73523	4	141.712
scaffold_136	81447	4	142.626
scaffold_136	189851	4	143.342
scaffold_136	212256	4	143.342
scaffold_136	235318	4	143.342
scaffold_136	228086	4	143.342
scaffold_142	4945	4	144.627
scaffold_142	16466	4	144.627
scaffold_142	4944	4	144.627
scaffold_369	15664	4	144.627
scaffold_136	328486	4	144.627
scaffold_369	15667	4	144.627
scaffold_136	328496	4	144.627
scaffold_142	60867	4	144.627
scaffold_369	105415	4	144.627
scaffold_136	328490	4	144.627
scaffold_369	9908	4	144.627
scaffold_369	15676	4	144.627
scaffold_136	328487	4	144.627
scaffold_142	22705	4	144.627
scaffold_136	271779	4	144.627
scaffold_369	76756	4	144.627
scaffold_369	76729	4	144.627
scaffold_366	156882	4	145.868
scaffold_200	12368	4	145.868
scaffold_200	127941	4	145.868
scaffold_200	63832	4	145.868
scaffold_200	284153	4	145.868
scaffold_366	197991	4	145.868
scaffold_142	252103	4	145.868
scaffold_119	41874	4	145.868
scaffold_200	49100	4	145.868
scaffold_200	40792	4	145.868
scaffold_200	127958	4	145.868
scaffold_366	190551	4	145.868
scaffold_119	315758	4	145.868
scaffold_200	127990	4	145.868
scaffold_142	219090	4	145.868
scaffold_119	41810	4	145.868
scaffold_366	85736	4	145.868
scaffold_366	156821	4	145.868
scaffold_809	35169	4	145.868
scaffold_462	14488	4	145.868
scaffold_462	14453	4	145.868
scaffold_366	97485	4	145.868
scaffold_809	35177	4	145.868
scaffold_345	139647	4	147.549
scaffold_341	28451	4	149.253
scaffold_345	44518	4	149.253
scaffold_11	255097	4	151.316
scaffold_11	255096	4	151.316
scaffold_259	138175	4	153.582
scaffold_11	104408	4	153.582
scaffold_11	143519	4	153.582
scaffold_259	138157	4	153.582
scaffold_11	535933	4	156.803
scaffold_11	535974	4	156.803
scaffold_11	535959	4	156.803
scaffold_11	535953	4	156.803
scaffold_11	569285	4	156.803
scaffold_11	645434	4	156.803
scaffold_49	181999	4	158.159
scaffold_48	478333	4	159.446
scaffold_49	399446	4	159.446
scaffold_49	395531	4	159.446
scaffold_49	381416	4	159.446
scaffold_48	433588	4	159.446
scaffold_48	73672	4	159.446
scaffold_48	478259	4	159.446
scaffold_48	184131	4	159.446
scaffold_181	25362	4	160.098
scaffold_351	91649	4	160.098
scaffold_181	48213	4	160.098
scaffold_351	91661	4	160.098
scaffold_181	25325	4	160.098
scaffold_181	44974	4	160.098
scaffold_181	25365	4	160.098
scaffold_181	44978	4	160.098
scaffold_181	146836	4	160.821
scaffold_181	161147	4	160.821
scaffold_181	158821	4	160.821
scaffold_181	95624	4	160.821
scaffold_35	482364	4	161.632
scaffold_35	384305	4	162.481
scaffold_35	297081	4	164.023
scaffold_50	306032	4	167.916
scaffold_50	249485	4	167.916
scaffold_50	110763	4	167.916
scaffold_50	376870	4	167.916
scaffold_35	74204	4	167.916
scaffold_35	34495	4	167.916
scaffold_50	183647	4	167.916
scaffold_50	185253	4	167.916
scaffold_35	202805	4	167.916
scaffold_35	251980	4	167.916
scaffold_35	253794	4	167.916
scaffold_35	251981	4	167.916
scaffold_123	130989	4	170.775
scaffold_123	212330	4	170.775
scaffold_123	207880	4	170.775
scaffold_123	247525	4	170.775
scaffold_273	20181	4	172.684
scaffold_273	20148	4	172.684
scaffold_273	20162	4	172.684
scaffold_273	20187	4	172.684
scaffold_273	74664	4	176.314
scaffold_532	83811	4	176.314
scaffold_273	182216	4	176.314
scaffold_213	50328	4	176.314
scaffold_273	38419	4	176.314
scaffold_640	40143	4	176.314
scaffold_213	145708	4	179.5
scaffold_372	115090	4	180.743
scaffold_916	28677	4	180.743
scaffold_545	85260	4	181.478
scaffold_545	85255	4	181.478
scaffold_246	14546	4	181.478
scaffold_246	25459	4	182.722
scaffold_545	109773	4	189.656
scaffold_545	85213	4	189.656
scaffold_246	125631	4	191.647
scaffold_432	68340	4	195.957
scaffold_391	159546	4	207.139
scaffold_1072	23125	4	207.139
scaffold_115	242100	4	207.139
scaffold_115	335201	4	207.139
scaffold_115	184800	4	207.139
scaffold_115	242072	4	207.139
scaffold_115	242048	4	207.139
scaffold_476	2862	4	207.139
scaffold_656	35102	4	207.139
scaffold_898	37545	4	207.139
scaffold_816	13796	4	207.139
scaffold_898	53338	4	207.139
scaffold_898	37614	4	207.139
scaffold_329	23870	4	207.139
scaffold_329	122969	4	207.139
scaffold_329	122916	4	207.139
scaffold_329	122938	4	207.139
scaffold_329	108741	4	207.139
scaffold_329	59610	4	207.139
scaffold_329	39140	4	207.139
scaffold_329	81173	4	207.139
scaffold_432	131756	4	207.139
scaffold_816	64102	4	207.139
scaffold_638	80902	4	207.139
scaffold_329	108732	4	207.139
scaffold_1463	14480	4	207.139
scaffold_432	116101	4	207.139
scaffold_638	32631	4	207.139
scaffold_432	29415	4	207.139
scaffold_1057	14140	4	212.869
scaffold_334	85846	4	215.455
scaffold_485	102424	4	215.455
scaffold_297	201027	4	218.442
scaffold_297	156200	4	218.442
scaffold_297	162079	4	218.442
scaffold_297	9207	4	220.881
scaffold_598	128498	4	224.764
scaffold_598	12667	4	224.764
scaffold_598	12668	4	224.764
scaffold_1110	51047	4	225.625
scaffold_1110	50994	4	225.625
scaffold_683	77235	4	226.527
scaffold_588	22517	4	227.322
scaffold_1141	29523	4	227.322
scaffold_1141	22389	4	227.322
scaffold_860	57160	4	228.338
scaffold_637	38908	4	228.338
scaffold_526	3446	4	228.338
scaffold_526	124068	4	228.338
scaffold_869	12889	4	228.338
scaffold_526	124082	4	228.338
scaffold_526	89909	4	228.338
scaffold_860	57163	4	228.338
scaffold_683	67202	4	228.338
scaffold_776	11013	4	229.95
scaffold_8	760111	4	230.877
scaffold_8	718943	4	230.877
scaffold_8	718944	4	230.877
scaffold_8	690146	4	234.287
scaffold_8	690169	4	234.287
scaffold_8	670973	4	235.195
scaffold_8	670974	4	235.195
scaffold_8	670936	4	235.195
scaffold_8	622861	4	237.078
scaffold_8	507304	4	239.47
scaffold_8	441544	4	241.498
scaffold_8	441538	4	241.498
scaffold_8	486074	4	241.498
scaffold_8	447205	4	241.498
scaffold_8	393785	4	241.498
scaffold_8	329910	4	244.961
scaffold_103	226502	4	244.961
scaffold_8	268775	4	244.961
scaffold_103	365508	4	248.969
scaffold_585	42165	4	254.367
scaffold_4	235535	4	258.846
scaffold_4	684521	4	263.27
scaffold_4	630134	4	263.27
scaffold_4	754948	4	263.27
scaffold_411	44617	4	264.93
scaffold_411	44637	4	264.93
scaffold_411	44590	4	264.93
scaffold_1	135567	4	267.122
scaffold_1	135507	4	267.122
scaffold_1	135525	4	267.122
scaffold_1	135523	4	267.122
scaffold_1	8319	4	267.122
scaffold_1	8299	4	267.122
scaffold_1	8339	4	267.122
scaffold_1	135554	4	267.122
scaffold_1	8326	4	267.122
scaffold_1	135515	4	267.122
scaffold_1	8376	4	267.122
scaffold_1	263186	4	270.256
scaffold_1	289012	4	271.019
scaffold_1	289026	4	271.019
scaffold_1	381154	4	271.019
scaffold_1	320998	4	271.019
scaffold_1	342021	4	271.019
scaffold_1	342018	4	271.019
scaffold_1	390152	4	271.781
scaffold_1	634729	4	274.996
scaffold_1	845653	4	274.996
scaffold_1	950743	4	277.455
scaffold_1	1101098	4	279.341
scaffold_1	1180904	4	280.549
scaffold_1	1291835	4	281.473
scaffold_1	1291825	4	281.473
scaffold_1	1291878	4	281.473
scaffold_1	1368191	4	281.473
scaffold_1	1494916	4	288.673
scaffold_141	162628	5	0
scaffold_146	11067	5	2.33354
scaffold_367	145464	5	2.33354
scaffold_367	145507	5	2.33354
scaffold_104	206648	5	4.82006
scaffold_104	188214	5	4.82006
scaffold_382	134963	5	5.44121
scaffold_382	134894	5	5.44121
scaffold_382	163352	5	5.44121
scaffold_489	114970	5	9.82766
scaffold_44	432982	5	26.6352
scaffold_212	239271	5	30.8271
scaffold_44	16768	5	33.2325
scaffold_126	330601	5	33.2325
scaffold_126	330619	5	33.2325
scaffold_126	229705	5	33.2325
scaffold_126	193392	5	33.2325
scaffold_1228	29457	5	34.1816
scaffold_126	122291	5	34.1816
scaffold_212	45768	5	34.8221
scaffold_489	123695	5	35.8766
scaffold_332	112222	5	38.2299
scaffold_162	273048	5	40.9947
scaffold_162	273050	5	40.9947
scaffold_162	224793	5	42.825
scaffold_162	184190	5	42.825
scaffold_382	17536	5	42.825
scaffold_162	224772	5	42.825
scaffold_382	17565	5	42.825
scaffold_382	17568	5	42.825
scaffold_382	134923	5	42.825
scaffold_1735	13824	5	42.825
scaffold_284	151813	5	42.825
scaffold_104	189418	5	42.825
scaffold_146	64558	5	46.8513
scaffold_141	257552	5	49.0997
scaffold_141	283922	5	49.0997
scaffold_397	172217	5	53.2931
scaffold_1217	11747	5	56.4027
scaffold_1217	10151	5	56.4027
scaffold_1217	10161	5	56.4027
scaffold_20	523417	5	58.7278
scaffold_20	402006	5	61.6731
scaffold_381	3754	5	64.5846
scaffold_381	3710	5	64.5846
scaffold_20	69367	5	67.2581
scaffold_20	69406	5	67.2581
scaffold_20	69372	5	67.2581
scaffold_20	342337	5	67.2581
scaffold_381	92692	5	69.9126
scaffold_381	92680	5	69.9126
scaffold_381	113447	5	69.9126
scaffold_381	113427	5	69.9126
scaffold_381	114609	5	69.9126
scaffold_381	84495	5	69.9126
scaffold_381	97513	5	69.9126
scaffold_381	178075	5	70.8265
scaffold_381	172183	5	70.8265
scaffold_381	172182	5	70.8265
scaffold_381	178058	5	70.8265
scaffold_381	178089	5	70.8265
scaffold_278	158311	5	72.2216
scaffold_278	159384	5	72.2216
scaffold_278	248225	5	73.586
scaffold_278	177186	5	73.586
scaffold_278	177178	5	73.586
scaffold_525	111480	5	75.956
scaffold_525	12855	5	78.8681
scaffold_2075	7924	5	87.1793
scaffold_2075	7977	5	87.1793
scaffold_835	13336	5	87.1793
scaffold_967	40167	5	92.5729
scaffold_967	39191	5	92.5729
scaffold_110	248920	5	97.8704
scaffold_1224	22412	5	100.191
scaffold_1094	33697	5	100.191
scaffold_1094	33720	5	100.191
scaffold_1224	22418	5	100.191
scaffold_1224	22452	5	100.191
scaffold_756	47554	5	100.191
scaffold_1690	8221	5	100.191
scaffold_61	211504	5	100.932
scaffold_61	184833	5	100.932
scaffold_61	100510	5	100.932
scaffold_61	162286	5	100.932
scaffold_61	357706	5	100.932
scaffold_61	270167	5	100.932
scaffold_61	211540	5	100.932
scaffold_450	105823	5	102.071
scaffold_450	105781	5	102.071
scaffold_529	67169	5	102.693
scaffold_99	262599	5	105.813
scaffold_99	272883	5	105.813
scaffold_99	262634	5	105.813
scaffold_99	262600	5	105.813
scaffold_99	196048	5	105.813
scaffold_99	195557	5	106.872
scaffold_99	195571	5	106.872
scaffold_99	87169	5	109.477
scaffold_399	112095	5	113.198
scaffold_399	112068	5	113.198
scaffold_399	112050	5	113.198
scaffold_399	151235	5	113.198
scaffold_399	164896	5	113.983
scaffold_399	164916	5	113.983
scaffold_423	20459	5	115.847
scaffold_539	32651	5	115.847
scaffold_539	32624	5	115.847
scaffold_539	32634	5	115.847
scaffold_539	32863	5	115.847
scaffold_352	116051	5	117.429
scaffold_186	61739	5	121.323
scaffold_1692	4980	5	125.634
scaffold_161	129625	5	126.45
scaffold_161	151878	5	126.45
scaffold_161	203156	5	126.45
scaffold_33	360441	5	129.56
scaffold_78	379838	5	132.669
scaffold_78	379369	5	132.669
scaffold_78	379867	5	132.669
scaffold_78	271216	5	133.291
scaffold_78	313131	5	133.291
scaffold_78	218616	5	133.291
scaffold_78	271212	5	133.291
scaffold_78	322413	5	133.291
scaffold_78	149547	5	133.913
scaffold_78	64345	5	133.913
scaffold_560	37550	5	135.78
scaffold_560	37516	5	135.78
scaffold_544	40888	5	137.863
scaffold_587	26578	5	137.863
scaffold_78	139726	5	149.763
scaffold_134	166720	5	162.413
scaffold_134	331362	5	163.114
scaffold_134	268628	5	163.114
scaffold_134	271419	5	163.114
scaffold_134	113182	5	163.114
scaffold_544	49529	5	163.787
scaffold_810	33592	5	165.029
scaffold_810	30393	5	165.029
scaffold_810	30396	5	165.029
scaffold_1788	9545	5	168.139
scaffold_1096	30186	5	168.139
scaffold_1256	27096	5	168.139
scaffold_1075	6092	5	168.139
scaffold_1256	5409	5	168.873
scaffold_86	59472	5	173.941
scaffold_86	73836	5	173.941
scaffold_86	70258	5	173.941
scaffold_211	242501	5	173.941
scaffold_516	136993	5	173.941
scaffold_86	79309	5	173.941
scaffold_211	242505	5	173.941
scaffold_211	242493	5	173.941
scaffold_347	87364	5	173.941
scaffold_211	222541	5	173.941
scaffold_189	182202	5	175.727
scaffold_189	112187	5	176.928
scaffold_189	141321	5	176.928
scaffold_515	5294	5	177.612
scaffold_413	102936	5	177.612
scaffold_361	86406	5	177.612
scaffold_515	108648	5	177.612
scaffold_413	94733	5	177.612
scaffold_413	90425	5	177.612
scaffold_452	52734	5	178.977
scaffold_452	53222	5	178.977
scaffold_409	2723	5	180.564
scaffold_208	248294	5	183.79
scaffold_208	197901	5	183.79
scaffold_208	191660	5	183.79
scaffold_400	172887	5	185.511
scaffold_400	172937	5	185.511
scaffold_208	278130	5	185.511
scaffold_400	123294	5	187.559
scaffold_400	129622	5	187.559
scaffold_400	149182	5	187.559
scaffold_400	123226	5	187.559
scaffold_400	129600	5	187.559
scaffold_400	123244	5	187.559
scaffold_400	123220	5	187.559
scaffold_400	36637	5	189.114
scaffold_400	112065	5	189.114
scaffold_400	15127	5	190.669
scaffold_415	154396	5	191.6
scaffold_415	154406	5	191.6
scaffold_415	103695	5	193.359
[truncated: 689 more rows]

## Sheet: Family8
Scaffold ID	scaffold position	LG	genetic position
scaffold_176	65563	1	0
scaffold_7	3130	1	0
scaffold_176	269024	1	0
scaffold_1513	18493	1	2.92686
scaffold_1018	4251	1	2.92686
scaffold_983	21561	1	2.92686
scaffold_983	21604	1	2.92686
scaffold_194	283143	1	8.3001
scaffold_194	156923	1	8.3001
scaffold_194	156924	1	8.3001
scaffold_194	317157	1	8.3001
scaffold_194	156964	1	8.3001
scaffold_194	175995	1	8.3001
scaffold_520	137447	1	10.6019
scaffold_520	137451	1	10.6019
scaffold_151	265145	1	16.1805
scaffold_177	10156	1	16.1805
scaffold_463	118907	1	16.1805
scaffold_463	154037	1	16.1805
scaffold_177	263112	1	19.891
scaffold_177	273345	1	21.7437
scaffold_124	43952	1	23.5964
scaffold_124	265107	1	23.5964
scaffold_308	61188	1	25.4491
scaffold_536	53304	1	25.4491
scaffold_675	3718	1	25.4491
scaffold_675	48535	1	25.4491
scaffold_675	48553	1	25.4491
scaffold_803	18943	1	25.4491
scaffold_308	147200	1	25.4491
scaffold_80	102920	1	27.3018
scaffold_80	102946	1	27.3018
scaffold_80	102958	1	27.3018
scaffold_80	324183	1	29.1545
scaffold_80	324236	1	29.1545
scaffold_80	324247	1	29.1545
scaffold_80	185111	1	29.1545
scaffold_300	95567	1	31.0072
scaffold_300	140786	1	31.0072
scaffold_300	244278	1	34.7177
scaffold_300	244294	1	34.7177
scaffold_300	244358	1	34.7177
scaffold_54	86746	1	34.7177
scaffold_54	118273	1	34.7177
scaffold_54	118283	1	34.7177
scaffold_54	168841	1	34.7177
scaffold_54	360420	1	36.5704
scaffold_54	394918	1	36.5704
scaffold_56	272409	1	38.4231
scaffold_56	285339	1	38.4231
scaffold_56	134146	1	38.4231
scaffold_56	272384	1	38.4231
scaffold_1542	3734	1	42.1336
scaffold_1542	8755	1	42.1336
scaffold_488	12018	1	42.1336
scaffold_613	88296	1	42.1336
scaffold_659	15887	1	42.1336
scaffold_659	70707	1	42.1336
scaffold_1542	3723	1	42.1336
scaffold_613	88319	1	42.1336
scaffold_613	100406	1	42.1336
scaffold_659	70735	1	42.1336
scaffold_342	125567	1	43.9863
scaffold_107	75414	1	49.5649
scaffold_107	266161	1	49.5649
scaffold_107	266188	1	49.5649
scaffold_107	281529	1	49.5649
scaffold_165	149716	1	49.5649
scaffold_165	149745	1	49.5649
scaffold_165	269274	1	49.5649
scaffold_107	169102	1	49.5649
scaffold_1190	6618	1	49.5649
scaffold_129	288042	1	49.5649
scaffold_29	624	1	51.4176
scaffold_29	84733	1	51.4176
scaffold_29	84734	1	51.4176
scaffold_29	200213	1	51.4176
scaffold_29	297086	1	51.4176
scaffold_107	350566	1	51.4176
scaffold_29	297120	1	51.4176
scaffold_198	189519	1	53.2703
scaffold_198	200474	1	53.2703
scaffold_198	200520	1	53.2703
scaffold_198	298885	1	53.2703
scaffold_29	518707	1	53.2703
scaffold_43	437412	1	53.2703
scaffold_43	437414	1	53.2703
scaffold_43	475130	1	53.2703
scaffold_64	273169	1	53.2703
scaffold_64	322303	1	53.2703
scaffold_198	63469	1	53.2703
scaffold_198	200511	1	53.2703
scaffold_198	298765	1	53.2703
scaffold_198	298777	1	53.2703
scaffold_198	298787	1	53.2703
scaffold_198	298804	1	53.2703
scaffold_198	298809	1	53.2703
scaffold_198	298858	1	53.2703
scaffold_198	298859	1	53.2703
scaffold_198	298866	1	53.2703
scaffold_198	298871	1	53.2703
scaffold_198	298879	1	53.2703
scaffold_198	298901	1	53.2703
scaffold_43	246725	1	53.2703
scaffold_43	437417	1	53.2703
scaffold_64	322235	1	53.2703
scaffold_43	155311	1	53.2703
scaffold_64	433388	1	55.1231
scaffold_64	469369	1	55.1231
scaffold_32	322150	1	56.9758
scaffold_32	527339	1	56.9758
scaffold_41	442356	1	56.9758
scaffold_32	459098	1	56.9758
scaffold_41	37869	1	56.9758
scaffold_41	187457	1	56.9758
scaffold_41	422031	1	56.9758
scaffold_32	189730	1	58.8285
scaffold_32	31185	1	60.6812
scaffold_32	37620	1	60.6812
scaffold_339	172757	1	60.6812
scaffold_118	293122	1	62.5339
scaffold_118	279335	1	64.9202
scaffold_118	219758	1	64.9202
scaffold_118	102798	1	67.3065
scaffold_55	89743	1	71.017
scaffold_55	145778	1	71.017
scaffold_55	206946	1	71.017
scaffold_55	322549	1	71.017
scaffold_55	322561	1	71.017
scaffold_379	51158	1	72.8697
scaffold_379	51184	1	72.8697
scaffold_379	72440	1	72.8697
scaffold_55	25010	1	72.8697
scaffold_55	50395	1	72.8697
scaffold_766	66947	1	72.8697
scaffold_92	4681	1	72.8697
scaffold_92	135068	1	72.8697
scaffold_55	24994	1	72.8697
scaffold_55	25020	1	72.8697
scaffold_55	25030	1	72.8697
scaffold_766	66446	1	72.8697
scaffold_92	35329	1	74.7224
scaffold_179	209331	1	76.5751
scaffold_179	209347	1	76.5751
scaffold_179	188752	1	76.5751
scaffold_179	238558	1	76.5751
scaffold_179	63471	1	78.4278
scaffold_179	63474	1	78.4278
scaffold_179	42382	1	78.4278
scaffold_179	113875	1	78.4278
scaffold_179	113918	1	78.4278
scaffold_765	33511	1	78.4278
scaffold_71	91504	1	82.1383
scaffold_71	143732	1	82.1383
scaffold_59	130339	1	85.8488
scaffold_71	305190	1	85.8488
scaffold_71	304294	1	85.8488
scaffold_71	367577	1	85.8488
scaffold_71	367590	1	85.8488
scaffold_71	367594	1	85.8488
scaffold_59	351266	1	87.7015
scaffold_59	393308	1	87.7015
scaffold_160	104283	1	89.5542
scaffold_160	192056	1	89.5542
scaffold_160	265539	1	89.5542
scaffold_568	9933	1	89.5542
scaffold_568	18374	1	89.5542
scaffold_568	23903	1	89.5542
scaffold_568	23925	1	89.5542
scaffold_568	25292	1	89.5542
scaffold_568	25359	1	89.5542
scaffold_568	88322	1	89.5542
scaffold_59	229452	1	89.5542
scaffold_160	163601	1	89.5542
scaffold_147	195351	1	94.4429
scaffold_147	195320	1	94.4429
scaffold_225	139978	1	99.2382
scaffold_236	1063	1	99.2382
scaffold_384	129355	1	99.2382
scaffold_384	194832	1	99.2382
scaffold_428	55105	1	99.2382
scaffold_428	79859	1	99.2382
scaffold_428	79875	1	99.2382
scaffold_100	50652	1	99.2382
scaffold_100	199877	1	99.2382
scaffold_100	199917	1	99.2382
scaffold_100	272815	1	99.2382
scaffold_100	306422	1	99.2382
scaffold_100	306473	1	99.2382
scaffold_236	177854	1	99.2382
scaffold_236	189932	1	99.2382
scaffold_763	26859	1	99.2382
scaffold_1038	33134	1	104.817
scaffold_133	104557	1	104.817
scaffold_133	104571	1	104.817
scaffold_133	104600	1	104.817
scaffold_133	104612	1	104.817
scaffold_133	104625	1	104.817
scaffold_133	104628	1	104.817
scaffold_1536	17713	1	104.817
scaffold_492	84032	1	104.817
scaffold_730	50919	1	104.817
scaffold_730	50935	1	104.817
scaffold_796	65941	1	104.817
scaffold_519	34977	1	104.817
scaffold_133	304952	1	106.67
scaffold_133	304955	1	106.67
scaffold_215	90611	1	106.67
scaffold_215	199608	1	106.67
scaffold_215	227101	1	106.67
scaffold_215	227161	1	106.67
scaffold_215	227634	1	106.67
scaffold_215	227670	1	106.67
scaffold_258	117228	1	108.522
scaffold_258	234401	1	110.375
scaffold_1310	14176	1	112.228
scaffold_248	57466	1	112.228
scaffold_248	102099	1	112.228
scaffold_248	129772	1	112.228
scaffold_344	49776	1	112.228
scaffold_344	97462	1	112.228
scaffold_424	18692	1	112.228
scaffold_424	114137	1	112.228
scaffold_424	114168	1	112.228
scaffold_424	114182	1	112.228
scaffold_513	76110	1	112.228
scaffold_513	76111	1	112.228
scaffold_642	10905	1	112.228
scaffold_642	55374	1	112.228
scaffold_248	244348	1	112.228
scaffold_190	255506	1	115.939
scaffold_190	296531	1	115.939
scaffold_190	296536	1	115.939
scaffold_190	296546	1	115.939
scaffold_190	314464	1	115.939
scaffold_508	35597	1	115.939
scaffold_508	35598	1	115.939
scaffold_508	108484	1	115.939
scaffold_508	109030	1	115.939
scaffold_508	85857	1	115.939
scaffold_190	171538	1	117.792
scaffold_190	173941	1	117.792
scaffold_190	29735	1	120.645
scaffold_190	113198	1	120.645
scaffold_190	128274	1	120.645
scaffold_97	15509	1	120.645
scaffold_97	15525	1	120.645
scaffold_97	115927	1	123.499
scaffold_97	149726	1	123.499
scaffold_97	149754	1	123.499
scaffold_97	175779	1	123.499
scaffold_97	188110	1	123.499
scaffold_97	148839	1	123.499
scaffold_97	175793	1	123.499
scaffold_97	263915	1	127.008
scaffold_15	82955	1	130.873
scaffold_15	187482	1	130.873
scaffold_15	209686	1	130.873
scaffold_15	237071	1	130.873
scaffold_15	451115	1	130.873
scaffold_97	397794	1	130.873
scaffold_15	175887	1	130.873
scaffold_15	175889	1	130.873
scaffold_97	332712	1	130.873
scaffold_283	14791	1	138.622
scaffold_283	43464	1	138.622
scaffold_283	86078	1	138.622
scaffold_150	259242	1	140.475
scaffold_150	259249	1	140.475
scaffold_150	259255	1	140.475
scaffold_150	307045	1	140.475
scaffold_805	32607	1	142.327
scaffold_90	69883	1	142.327
scaffold_90	69895	1	142.327
scaffold_90	69898	1	142.327
scaffold_90	189451	1	142.327
scaffold_90	289963	1	142.327
scaffold_90	289995	1	142.327
scaffold_94	208662	1	142.327
scaffold_94	244000	1	142.327
scaffold_94	328233	1	142.327
scaffold_94	328268	1	142.327
scaffold_94	382757	1	142.327
scaffold_94	208687	1	142.327
scaffold_37	79337	1	144.18
scaffold_37	79386	1	144.18
scaffold_37	242395	1	144.18
scaffold_37	431808	1	144.18
scaffold_37	431845	1	144.18
scaffold_850	26452	1	144.18
scaffold_1425	1266	1	144.18
scaffold_1425	1306	1	144.18
scaffold_37	117314	1	144.18
scaffold_37	379470	1	144.18
scaffold_850	23488	1	144.18
scaffold_252	112273	1	147.891
scaffold_252	177259	1	147.891
scaffold_252	177260	1	147.891
scaffold_496	44339	1	147.891
scaffold_496	44358	1	147.891
scaffold_73	35650	1	147.891
scaffold_73	35981	1	147.891
scaffold_73	99788	1	147.891
scaffold_73	123431	1	147.891
scaffold_73	123439	1	147.891
scaffold_73	123440	1	147.891
scaffold_73	123446	1	147.891
scaffold_73	218173	1	147.891
scaffold_73	218201	1	147.891
scaffold_252	66463	1	147.891
scaffold_252	66472	1	147.891
scaffold_73	291625	1	147.891
scaffold_72	96389	1	153.641
scaffold_72	238124	1	153.641
scaffold_72	253134	1	153.641
scaffold_72	70081	1	155.664
scaffold_58	61214	1	155.664
scaffold_58	170733	1	155.664
scaffold_58	193730	1	155.664
scaffold_632	72335	1	159.376
scaffold_102	250149	1	161.23
scaffold_102	304562	1	161.23
scaffold_593	32004	1	161.23
scaffold_102	48375	1	164.94
scaffold_102	72356	1	164.94
scaffold_102	72378	1	164.94
scaffold_18	587343	1	164.94
scaffold_267	73181	1	164.94
scaffold_267	73201	1	164.94
scaffold_267	199670	1	164.94
scaffold_267	41183	1	164.94
scaffold_267	44878	1	164.94
scaffold_114	286387	1	168.651
scaffold_114	331010	1	168.651
scaffold_114	331040	1	168.651
scaffold_143	50106	1	168.651
scaffold_143	116285	1	168.651
scaffold_18	283811	1	168.651
scaffold_18	312332	1	168.651
scaffold_63	45052	1	168.651
scaffold_63	293449	1	168.651
scaffold_63	305834	1	168.651
scaffold_63	305888	1	168.651
scaffold_63	321704	1	168.651
scaffold_63	430894	1	168.651
scaffold_63	470693	1	168.651
scaffold_18	151284	1	168.651
scaffold_18	151293	1	168.651
scaffold_63	255668	1	168.651
scaffold_143	198777	1	170.505
scaffold_143	259321	1	170.505
scaffold_195	25412	1	170.505
scaffold_163	135998	1	174.215
scaffold_195	126688	1	174.215
scaffold_195	209780	1	174.215
scaffold_380	166611	1	174.215
scaffold_380	166646	1	174.215
scaffold_664	2412	1	174.215
scaffold_163	211721	1	174.215
scaffold_163	312295	1	174.215
scaffold_34	126802	2	0
scaffold_34	185110	2	0
scaffold_47	121253	2	0
scaffold_47	121255	2	0
scaffold_47	121257	2	0
scaffold_47	121259	2	0
scaffold_47	370292	2	0
scaffold_47	433737	2	0
scaffold_47	482123	2	0
scaffold_47	496517	2	0
scaffold_188	233745	2	1.8527
scaffold_188	233747	2	1.8527
scaffold_188	266543	2	1.8527
scaffold_188	285825	2	1.8527
scaffold_188	97219	2	3.92821
scaffold_188	63747	2	3.92821
scaffold_188	137573	2	3.92821
scaffold_188	137593	2	3.92821
scaffold_188	137597	2	3.92821
scaffold_45	108025	2	3.92821
scaffold_178	76499	2	6.00373
scaffold_405	122144	2	6.00373
scaffold_321	148836	2	7.85643
scaffold_321	234040	2	7.85643
scaffold_321	234086	2	7.85643
scaffold_120	138758	2	11.5669
scaffold_120	179531	2	11.5669
scaffold_120	234336	2	11.5669
scaffold_120	237773	2	11.5669
scaffold_120	318473	2	11.5669
scaffold_230	174318	2	11.5669
scaffold_230	35524	2	13.4205
scaffold_230	35527	2	13.4205
scaffold_230	95204	2	13.4205
scaffold_230	96427	2	13.4205
scaffold_230	96432	2	13.4205
scaffold_595	25344	2	13.4205
scaffold_595	50845	2	13.4205
scaffold_595	102684	2	13.4205
scaffold_595	102689	2	13.4205
scaffold_595	102741	2	13.4205
scaffold_230	35495	2	13.4205
scaffold_595	61956	2	13.4205
scaffold_480	84878	2	15.2741
scaffold_480	84911	2	15.2741
scaffold_1410	27687	2	18.9846
scaffold_573	8672	2	18.9846
scaffold_630	57214	2	18.9846
scaffold_537	111233	2	22.8013
scaffold_537	107826	2	22.8013
scaffold_622	81961	2	28.4867
scaffold_622	82004	2	28.4867
scaffold_622	82005	2	28.4867
scaffold_645	41020	2	31.5623
scaffold_645	49877	2	31.5623
scaffold_584	126689	2	34.0482
scaffold_719	13835	2	34.0482
scaffold_871	11157	2	34.0482
scaffold_101	323514	2	39.6268
scaffold_1519	21396	2	39.6268
scaffold_1703	16417	2	39.6268
scaffold_1977	8215	2	39.6268
scaffold_773	29771	2	39.6268
scaffold_972	20172	2	39.6268
scaffold_101	43149	2	39.6268
scaffold_101	43182	2	39.6268
scaffold_101	320623	2	39.6268
scaffold_101	323545	2	39.6268
scaffold_101	349504	2	39.6268
scaffold_889	33662	2	39.6268
scaffold_889	33667	2	39.6268
scaffold_1050	40049	2	41.4795
scaffold_1470	21285	2	41.4795
scaffold_303	2822	2	41.4795
scaffold_430	87946	2	41.4795
scaffold_430	87955	2	41.4795
scaffold_829	27729	2	41.4795
scaffold_829	27759	2	41.4795
scaffold_1050	18050	2	41.4795
scaffold_303	5209	2	41.4795
scaffold_303	5210	2	41.4795
scaffold_303	8362	2	41.4795
scaffold_865	37737	2	41.4795
scaffold_865	58626	2	41.4795
scaffold_303	107483	2	43.3322
scaffold_303	65301	2	43.3322
scaffold_303	220055	2	45.1849
scaffold_231	135127	2	47.0376
scaffold_231	214164	2	47.0376
scaffold_245	41332	2	48.8903
scaffold_245	41349	2	48.8903
scaffold_422	173604	2	48.8903
scaffold_245	199304	2	50.743
scaffold_245	199345	2	50.743
scaffold_245	199349	2	50.743
scaffold_286	29866	2	62.0426
scaffold_24	163384	2	63.8953
scaffold_24	398929	2	63.8953
scaffold_24	170316	2	63.8953
scaffold_24	392865	2	63.8953
scaffold_24	392903	2	63.8953
scaffold_24	398877	2	63.8953
scaffold_24	398886	2	63.8953
scaffold_24	398890	2	63.8953
scaffold_24	398918	2	63.8953
scaffold_24	398930	2	63.8953
scaffold_24	107048	2	65.748
scaffold_327	163261	2	65.748
scaffold_327	126837	2	67.6007
scaffold_327	126867	2	67.6007
scaffold_138	146629	2	71.3112
scaffold_138	277140	2	71.3112
scaffold_138	154010	2	71.3112
scaffold_138	154033	2	71.3112
scaffold_138	6817	2	73.1639
scaffold_254	25260	2	75.0166
scaffold_254	25316	2	75.0166
scaffold_254	170656	2	75.0166
scaffold_254	170682	2	75.0166
scaffold_254	174870	2	75.0166
scaffold_445	45371	2	76.9108
scaffold_445	79003	2	76.9108
scaffold_84	138728	2	78.8154
scaffold_84	216458	2	78.8154
scaffold_84	216468	2	78.8154
scaffold_84	393020	2	78.8154
scaffold_84	31257	2	82.5369
scaffold_493	121554	2	82.5369
scaffold_84	2149	2	82.5369
scaffold_493	112069	2	84.3896
scaffold_493	112090	2	84.3896
scaffold_60	300843	2	86.2466
scaffold_60	456173	2	86.2466
scaffold_60	55347	2	86.2466
scaffold_60	55362	2	86.2466
scaffold_60	441164	2	86.2466
scaffold_60	466860	2	86.2466
scaffold_60	466894	2	86.2466
scaffold_10	144477	2	88.1117
scaffold_10	325942	2	88.1117
scaffold_157	150498	2	88.1117
scaffold_16	86319	2	88.1117
scaffold_16	92215	2	88.1117
scaffold_16	179700	2	88.1117
scaffold_16	491696	2	88.1117
scaffold_16	492183	2	88.1117
scaffold_39	81257	2	88.1117
scaffold_39	81258	2	88.1117
scaffold_39	81262	2	88.1117
scaffold_39	81263	2	88.1117
scaffold_39	230997	2	88.1117
scaffold_39	240385	2	88.1117
scaffold_10	78477	2	88.1117
scaffold_16	57689	2	88.1117
scaffold_16	86283	2	88.1117
scaffold_16	86314	2	88.1117
scaffold_16	551782	2	88.1117
scaffold_16	601713	2	88.1117
scaffold_16	601758	2	88.1117
scaffold_191	4696	2	88.1117
scaffold_39	50365	2	88.1117
scaffold_191	132425	2	89.9724
scaffold_191	132433	2	89.9724
scaffold_191	132446	2	89.9724
scaffold_270	163014	2	89.9724
scaffold_292	182001	2	89.9724
scaffold_305	173210	2	89.9724
scaffold_309	35981	2	89.9724
scaffold_309	60613	2	89.9724
scaffold_309	185374	2	89.9724
scaffold_309	203292	2	89.9724
scaffold_309	203315	2	89.9724
scaffold_375	201936	2	89.9724
scaffold_497	16562	2	89.9724
scaffold_564	105500	2	89.9724
scaffold_564	105568	2	89.9724
scaffold_628	22292	2	89.9724
scaffold_629	80393	2	89.9724
scaffold_692	67178	2	89.9724
scaffold_807	60959	2	89.9724
scaffold_807	60974	2	89.9724
scaffold_1160	5766	2	89.9724
scaffold_1182	23880	2	89.9724
scaffold_1473	15781	2	89.9724
scaffold_1624	12573	2	89.9724
scaffold_1624	12585	2	89.9724
scaffold_266	22856	2	89.9724
scaffold_276	222591	2	89.9724
scaffold_292	181959	2	89.9724
scaffold_292	182267	2	89.9724
scaffold_305	173157	2	89.9724
scaffold_309	159803	2	89.9724
scaffold_375	156259	2	89.9724
scaffold_375	156276	2	89.9724
scaffold_375	201893	2	89.9724
scaffold_437	117335	2	89.9724
scaffold_437	117347	2	89.9724
scaffold_437	117367	2	89.9724
scaffold_437	156411	2	89.9724
scaffold_468	30557	2	89.9724
scaffold_468	30574	2	89.9724
scaffold_468	30609	2	89.9724
scaffold_468	30622	2	89.9724
scaffold_468	135560	2	89.9724
scaffold_629	16089	2	89.9724
scaffold_629	80369	2	89.9724
scaffold_927	45078	2	89.9724
scaffold_945	3361	2	89.9724
scaffold_957	14541	2	89.9724
scaffold_1010	12772	2	91.8251
scaffold_1010	22543	2	91.8251
scaffold_1234	27977	2	91.8251
scaffold_1234	30420	2	91.8251
scaffold_1088	9012	2	93.6779
scaffold_502	112279	2	97.3884
scaffold_502	112320	2	97.3884
scaffold_502	112351	2	97.3884
scaffold_589	109255	2	97.3884
scaffold_839	24626	2	99.2411
scaffold_1314	9456	2	99.2411
scaffold_2081	5756	2	99.2411
scaffold_491	21301	2	99.2411
scaffold_491	21313	2	99.2411
scaffold_491	21320	2	99.2411
scaffold_491	48117	2	99.2411
scaffold_491	48126	2	99.2411
scaffold_589	20664	2	99.2411
scaffold_589	20678	2	99.2411
scaffold_589	20691	2	99.2411
scaffold_839	41171	2	99.2411
scaffold_839	63195	2	99.2411
scaffold_82	104439	2	101.456
scaffold_571	9224	2	101.456
scaffold_82	154309	2	101.456
scaffold_82	154357	2	101.456
scaffold_571	55612	2	101.456
scaffold_265	157183	2	106.669
scaffold_304	136527	2	110.379
scaffold_304	39482	2	112.232
scaffold_304	57382	2	112.232
scaffold_304	57445	2	112.232
scaffold_304	71194	2	112.232
scaffold_304	71195	2	112.232
scaffold_859	39652	2	112.232
scaffold_105	57435	2	114.085
scaffold_105	288291	2	115.937
scaffold_218	38290	2	121.516
scaffold_218	38356	2	121.516
scaffold_268	69117	2	123.369
scaffold_268	182752	2	123.369
scaffold_268	182757	2	123.369
scaffold_268	69110	2	123.369
scaffold_239	31921	2	125.221
scaffold_83	58792	2	125.221
scaffold_239	62695	2	125.221
scaffold_239	115180	2	125.221
scaffold_239	115195	2	125.221
scaffold_239	115199	2	125.221
scaffold_83	58808	2	125.221
scaffold_83	354567	2	125.221
scaffold_19	430637	2	127.074
scaffold_19	430679	2	127.074
scaffold_19	449588	2	127.074
scaffold_19	462709	2	127.074
scaffold_19	462717	2	127.074
scaffold_19	462735	2	127.074
scaffold_443	108259	2	132.653
scaffold_443	108261	2	132.653
scaffold_461	55533	2	132.653
scaffold_461	55534	2	132.653
scaffold_615	20784	2	134.505
scaffold_615	20805	2	134.505
scaffold_615	47508	2	134.505
scaffold_615	47523	2	134.505
scaffold_615	47468	2	134.505
scaffold_806	2566	2	134.505
scaffold_615	100375	2	136.358
scaffold_615	107753	2	136.358
scaffold_533	47955	2	138.211
scaffold_88	358826	2	138.211
scaffold_533	105353	2	140.063
scaffold_385	89326	2	141.916
scaffold_214	43027	2	141.916
scaffold_214	293580	2	141.916
scaffold_93	14935	2	141.916
scaffold_93	14989	2	141.916
scaffold_93	116745	2	141.916
scaffold_93	366537	2	143.769
scaffold_93	189971	2	143.769
scaffold_93	366506	2	143.769
scaffold_235	157352	2	149.347
scaffold_235	157341	2	149.347
scaffold_460	125949	2	151.202
scaffold_17	82438	2	153.057
scaffold_17	164735	2	153.057
scaffold_23	115344	2	153.057
scaffold_23	126004	2	153.057
scaffold_23	126013	2	153.057
scaffold_23	458161	2	153.057
scaffold_23	563288	2	153.057
scaffold_968	46127	2	153.057
scaffold_17	131381	2	153.057
scaffold_23	270589	2	153.057
scaffold_23	352080	2	153.057
scaffold_23	563242	2	153.057
scaffold_17	267081	2	154.91
scaffold_17	293222	2	154.91
scaffold_17	361557	2	154.91
scaffold_17	361633	2	154.91
scaffold_17	293163	2	154.91
scaffold_174	309329	2	156.834
scaffold_174	309348	2	156.834
scaffold_174	257571	2	156.834
scaffold_174	257576	2	156.834
scaffold_79	118340	2	158.823
scaffold_79	59445	2	158.823
scaffold_79	208841	2	160.768
scaffold_79	405021	2	160.768
scaffold_3	207361	2	160.768
scaffold_3	207375	2	160.768
scaffold_79	218854	2	160.768
scaffold_3	525725	2	162.645
scaffold_3	583515	2	164.497
scaffold_3	777648	2	164.497
scaffold_3	632600	2	164.497
scaffold_3	632624	2	164.497
scaffold_3	658638	2	164.497
scaffold_3	713745	2	164.497
scaffold_3	791258	2	164.497
scaffold_330	195845	2	166.35
scaffold_1635	4422	2	168.203
scaffold_1635	4437	2	168.203
scaffold_1635	4497	2	168.203
scaffold_538	50240	2	168.203
scaffold_1380	1446	2	170.055
scaffold_769	55450	2	170.055
scaffold_787	71553	2	170.055
scaffold_1077	17176	2	170.055
scaffold_1077	17191	2	170.055
scaffold_1077	30713	2	170.055
scaffold_1152	23238	2	170.055
scaffold_338	175275	2	170.055
scaffold_125	11386	2	173.766
scaffold_295	68533	2	173.766
scaffold_295	83661	2	173.766
scaffold_431	168007	2	173.766
scaffold_170	30626	2	175.619
scaffold_548	128652	2	175.619
scaffold_548	128654	2	175.619
scaffold_548	128656	2	175.619
scaffold_548	128667	2	175.619
scaffold_788	69289	2	175.619
scaffold_788	69290	2	175.619
scaffold_788	69311	2	175.619
scaffold_788	70575	2	175.619
scaffold_788	70597	2	175.619
scaffold_36	186071	2	177.507
scaffold_36	203965	2	177.507
scaffold_36	186731	2	177.507
scaffold_36	200405	2	177.507
scaffold_36	262081	2	177.507
scaffold_36	317757	2	177.507
scaffold_36	374419	2	177.507
scaffold_36	374477	2	177.507
scaffold_36	507548	2	179.418
scaffold_156	106035	2	179.418
scaffold_36	386335	2	179.418
scaffold_36	386353	2	179.418
scaffold_223	23610	3	0
scaffold_223	56484	3	0
scaffold_518	66895	3	3.7105
scaffold_601	7276	3	3.7105
scaffold_601	7330	3	3.7105
scaffold_601	92945	3	3.7105
scaffold_653	75655	3	3.7105
scaffold_601	53538	3	3.7105
scaffold_1216	17453	3	5.5632
scaffold_1250	11320	3	5.5632
scaffold_1216	17474	3	5.5632
scaffold_1017	3124	3	9.2737
scaffold_1858	12066	3	9.2737
scaffold_567	10675	3	9.2737
scaffold_844	6767	3	9.2737
scaffold_1579	19507	3	9.2737
scaffold_96	294917	3	11.1264
scaffold_96	350921	3	11.1264
scaffold_96	362470	3	12.9791
scaffold_96	362499	3	12.9791
scaffold_96	362520	3	12.9791
scaffold_689	80939	3	16.6896
scaffold_689	89308	3	16.6896
scaffold_1051	45684	3	18.5423
scaffold_583	44308	3	18.5423
scaffold_534	87426	3	20.395
scaffold_534	154687	3	20.395
scaffold_534	17609	3	20.395
scaffold_534	17635	3	20.395
scaffold_534	17646	3	20.395
scaffold_534	17649	3	20.395
scaffold_583	63419	3	20.395
scaffold_583	91864	3	20.395
scaffold_583	91879	3	20.395
scaffold_989	9481	3	26.6979
scaffold_1464	12810	3	26.6979
scaffold_1321	21825	3	26.6979
scaffold_989	13550	3	26.6979
scaffold_1489	3407	3	29.2662
scaffold_1489	3412	3	29.2662
scaffold_737	40417	3	29.2662
scaffold_737	76822	3	29.2662
scaffold_556	25760	3	31.1189
scaffold_1270	15138	3	32.9752
scaffold_1067	42882	3	32.9752
scaffold_757	7386	3	32.9752
scaffold_757	41675	3	32.9752
scaffold_757	41677	3	32.9752
scaffold_757	41720	3	32.9752
scaffold_899	54048	3	34.8613
scaffold_1308	20986	3	36.788
scaffold_1308	20988	3	36.788
scaffold_1985	1489	3	36.788
scaffold_2183	6106	3	36.788
scaffold_418	16666	3	36.788
scaffold_582	38191	3	36.788
scaffold_582	79513	3	36.788
scaffold_623	106372	3	36.788
scaffold_670	11046	3	36.788
scaffold_205	2447	3	36.788
scaffold_205	21489	3	36.788
scaffold_582	93854	3	36.788
scaffold_670	11013	3	36.788
scaffold_670	11014	3	36.788
scaffold_205	296147	3	40.5443
scaffold_69	353295	3	42.3969
scaffold_69	39434	3	44.4238
scaffold_69	39420	3	44.4238
scaffold_87	91039	3	46.6167
scaffold_153	83335	3	46.6167
scaffold_87	293737	3	46.6167
scaffold_87	327916	3	46.6167
scaffold_87	346775	3	46.6167
scaffold_153	83294	3	46.6167
scaffold_87	23559	3	46.6167
scaffold_12	120476	3	48.6738
scaffold_298	74168	3	48.6738
scaffold_298	160495	3	48.6738
scaffold_298	160512	3	48.6738
scaffold_378	25646	3	48.6738
scaffold_52	323865	3	48.6738
scaffold_127	171782	3	48.6738
scaffold_52	201314	3	48.6738
scaffold_52	323904	3	48.6738
scaffold_12	63569	3	48.6738
scaffold_52	468234	3	48.6738
scaffold_12	332093	3	50.5265
scaffold_12	515288	3	50.5265
scaffold_12	662660	3	50.5265
scaffold_12	569163	3	50.5265
scaffold_1122	8656	3	54.237
scaffold_1122	8658	3	54.237
scaffold_1122	8688	3	54.237
scaffold_232	142857	3	54.237
scaffold_576	19106	3	54.237
scaffold_906	30335	3	54.237
scaffold_1365	10706	3	54.237
scaffold_232	274280	3	54.237
scaffold_1122	17491	3	54.237
scaffold_168	82321	3	56.0897
scaffold_168	82359	3	56.0897
scaffold_340	191484	3	56.0897
scaffold_349	48871	3	56.0897
scaffold_349	48876	3	56.0897
scaffold_395	175911	3	56.0897
scaffold_340	112338	3	56.0897
scaffold_349	49171	3	56.0897
scaffold_349	49174	3	56.0897
scaffold_349	49193	3	56.0897
scaffold_395	44184	3	56.0897
scaffold_663	23063	3	57.9424
scaffold_663	75933	3	57.9424
scaffold_663	82115	3	57.9424
scaffold_663	82180	3	57.9424
scaffold_663	87896	3	57.9424
scaffold_663	39653	3	57.9424
scaffold_217	134939	3	59.7951
scaffold_356	168293	3	59.7951
scaffold_175	270924	3	59.7951
scaffold_175	270935	3	59.7951
scaffold_175	304548	3	59.7951
scaffold_356	150045	3	59.7951
scaffold_175	33454	3	61.8149
scaffold_550	19904	3	61.8149
scaffold_227	40849	3	63.8348
scaffold_227	203273	3	63.8348
scaffold_31	392163	3	63.8348
scaffold_31	528772	3	63.8348
scaffold_487	57191	3	63.8348
scaffold_31	389683	3	63.8348
scaffold_31	528797	3	63.8348
scaffold_31	321445	3	66.9273
scaffold_121	297583	3	66.9273
scaffold_31	300276	3	66.9273
scaffold_121	279284	3	66.9273
scaffold_31	81675	3	66.9273
scaffold_31	81683	3	66.9273
scaffold_31	182256	3	66.9273
scaffold_121	13290	3	69.5228
scaffold_6	101529	3	69.5228
scaffold_6	155373	3	69.5228
scaffold_6	182484	3	69.5228
scaffold_6	264378	3	69.5228
scaffold_6	273273	3	69.5228
scaffold_6	322442	3	69.5228
scaffold_6	322487	3	69.5228
scaffold_6	416014	3	69.5228
scaffold_6	490299	3	69.5228
scaffold_6	490306	3	69.5228
scaffold_68	201762	3	73.0182
scaffold_206	46503	3	74.8709
scaffold_206	46511	3	74.8709
scaffold_206	53967	3	74.8709
scaffold_206	53994	3	74.8709
scaffold_206	91579	3	74.8709
scaffold_311	66634	3	74.8709
scaffold_311	66699	3	74.8709
scaffold_311	75049	3	74.8709
scaffold_311	75052	3	74.8709
scaffold_311	105888	3	74.8709
scaffold_311	153474	3	74.8709
scaffold_311	243416	3	74.8709
scaffold_311	243428	3	74.8709
scaffold_311	243451	3	74.8709
scaffold_311	243482	3	74.8709
scaffold_311	243485	3	74.8709
scaffold_402	125670	3	74.8709
scaffold_484	23897	3	74.8709
scaffold_484	51867	3	74.8709
scaffold_484	122484	3	74.8709
scaffold_68	258378	3	74.8709
scaffold_68	380078	3	74.8709
scaffold_311	2772	3	76.7236
scaffold_551	38654	3	76.7236
scaffold_403	177873	3	78.5763
scaffold_691	55086	3	78.5763
scaffold_828	29465	3	78.5763
scaffold_828	35927	3	78.5763
scaffold_828	35989	3	78.5763
scaffold_828	47241	3	78.5763
scaffold_908	43550	3	78.5763
scaffold_908	43591	3	78.5763
scaffold_607	56868	3	80.429
scaffold_310	83785	3	82.2817
scaffold_498	110489	3	82.2817
scaffold_290	44093	3	84.1344
scaffold_290	44643	3	84.1344
scaffold_290	129360	3	84.1344
scaffold_290	218507	3	84.1344
scaffold_499	100954	3	84.1344
scaffold_499	100960	3	84.1344
scaffold_144	17375	3	89.713
scaffold_144	252374	3	89.713
scaffold_154	266117	3	95.2916
scaffold_320	206314	3	95.2916
scaffold_320	206315	3	95.2916
scaffold_320	206342	3	95.2916
scaffold_320	187487	3	95.2916
scaffold_320	128119	3	97.1443
scaffold_494	108654	3	101.018
scaffold_494	108687	3	101.018
scaffold_494	1211	3	101.018
scaffold_494	1252	3	101.018
scaffold_320	17192	3	101.018
scaffold_320	92523	3	101.018
scaffold_494	51483	3	101.018
scaffold_494	78624	3	101.018
scaffold_524	95195	3	101.018
scaffold_148	102178	3	108.647
scaffold_1952	9472	3	110.499
scaffold_1952	9481	3	110.499
scaffold_1952	9486	3	110.499
scaffold_1952	13226	3	110.499
scaffold_1952	12135	3	110.499
scaffold_914	26510	3	110.499
scaffold_293	165867	3	114.862
scaffold_293	165910	3	114.862
scaffold_1041	23340	3	114.862
scaffold_145	301405	3	114.862
scaffold_145	301421	3	114.862
scaffold_145	301446	3	114.862
scaffold_155	73565	3	114.862
scaffold_155	73608	3	114.862
scaffold_155	276173	3	114.862
scaffold_155	276245	3	114.862
scaffold_155	276246	3	114.862
scaffold_171	68593	3	114.862
scaffold_171	110384	3	114.862
scaffold_171	110401	3	114.862
scaffold_171	269881	3	114.862
scaffold_171	269890	3	114.862
scaffold_171	269899	3	114.862
scaffold_186	158418	3	114.862
scaffold_207	6270	3	114.862
scaffold_207	6311	3	114.862
scaffold_207	6318	3	114.862
scaffold_207	8098	3	114.862
scaffold_293	18304	3	114.862
scaffold_293	18324	3	114.862
scaffold_293	133845	3	114.862
scaffold_293	133854	3	114.862
scaffold_293	156430	3	114.862
scaffold_293	156452	3	114.862
scaffold_293	176262	3	114.862
scaffold_293	206089	3	114.862
scaffold_446	78988	3	114.862
scaffold_611	93841	3	114.862
scaffold_611	101712	3	114.862
scaffold_830	27208	3	114.862
scaffold_872	69644	3	114.862
scaffold_884	36992	3	114.862
scaffold_9	433677	3	114.862
scaffold_9	625205	3	114.862
scaffold_9	625221	3	114.862
scaffold_9	648997	3	114.862
scaffold_9	662864	3	114.862
scaffold_9	663349	3	114.862
scaffold_9	663360	3	114.862
scaffold_969	46930	3	114.862
scaffold_155	276227	3	114.862
scaffold_171	107274	3	114.862
scaffold_171	107294	3	114.862
scaffold_171	109591	3	114.862
scaffold_207	8062	3	114.862
scaffold_207	42395	3	114.862
scaffold_446	89333	3	114.862
scaffold_427	81331	3	118.709
scaffold_427	81397	3	118.709
scaffold_559	34881	3	118.709
scaffold_9	145566	3	118.709
scaffold_9	270254	3	118.709
scaffold_9	286090	3	118.709
scaffold_9	286095	3	118.709
scaffold_9	286119	3	118.709
scaffold_427	67676	3	118.709
scaffold_9	98469	3	118.709
scaffold_9	198623	3	118.709
scaffold_9	198641	3	118.709
scaffold_9	205711	3	118.709
scaffold_9	243032	3	118.709
scaffold_9	243042	3	118.709
scaffold_9	276749	3	118.709
scaffold_9	315089	3	118.709
scaffold_9	390954	3	118.709
scaffold_9	390960	3	118.709
scaffold_9	414021	3	118.709
scaffold_427	159022	3	118.709
scaffold_9	217940	3	118.709
scaffold_328	179104	3	122.03
scaffold_328	179145	3	122.03
scaffold_559	81102	3	122.03
scaffold_328	127569	3	122.03
scaffold_328	218531	3	122.03
scaffold_328	218546	3	122.03
scaffold_328	218557	3	122.03
scaffold_331	132736	3	124.793
scaffold_331	135739	3	124.793
scaffold_331	166395	3	124.793
scaffold_331	135660	3	124.793
scaffold_331	135669	3	124.793
scaffold_331	135674	3	124.793
scaffold_331	135714	3	124.793
scaffold_331	135722	3	124.793
scaffold_331	135723	3	124.793
scaffold_331	166349	3	124.793
scaffold_331	166370	3	124.793
scaffold_331	166377	3	124.793
scaffold_1288	13125	3	127.526
scaffold_1386	23748	3	130.1
scaffold_990	31297	3	130.1
scaffold_672	18587	3	135.679
scaffold_672	18607	3	135.679
scaffold_672	18616	3	135.679
scaffold_678	9870	3	135.679
scaffold_678	17086	3	135.679
scaffold_685	42504	3	137.532
scaffold_1084	34359	3	150.797
scaffold_1084	34380	3	150.797
scaffold_14	194641	3	156.376
scaffold_14	194643	3	156.376
scaffold_14	194649	3	156.376
scaffold_14	241616	3	156.376
scaffold_370	88841	3	158.229
scaffold_370	140778	3	158.229
scaffold_370	140797	3	158.229
scaffold_370	140816	3	158.229
scaffold_370	161857	3	158.229
scaffold_370	161916	3	158.229
scaffold_401	33712	3	158.229
scaffold_401	83500	3	158.229
scaffold_401	83524	3	158.229
scaffold_441	96562	3	158.229
scaffold_370	21544	3	160.095
scaffold_419	147092	3	160.095
scaffold_732	80193	3	160.095
scaffold_1572	6590	3	161.961
scaffold_1572	6601	3	161.961
scaffold_1572	6607	3	161.961
scaffold_1572	6615	3	161.961
scaffold_1004	50942	3	164.323
scaffold_1004	50970	3	164.323
scaffold_1004	50993	3	164.323
scaffold_131	75365	3	164.323
scaffold_131	102696	3	164.323
scaffold_131	176024	3	164.323
scaffold_1674	8184	3	169.39
scaffold_474	28674	3	169.39
scaffold_474	48422	3	169.39
scaffold_474	48425	3	169.39
scaffold_474	48428	3	169.39
scaffold_474	126039	3	169.39
scaffold_503	1860	3	169.39
scaffold_834	48793	3	169.39
scaffold_834	48816	3	169.39
scaffold_834	49246	3	169.39
scaffold_834	49286	3	169.39
scaffold_605	20100	4	0
scaffold_112	51792	4	1.86815
scaffold_112	244448	4	1.86815
scaffold_112	354183	4	1.86815
scaffold_202	145893	4	3.72085
scaffold_202	293213	4	3.72085
scaffold_620	24609	4	3.72085
scaffold_425	151916	4	5.57355
scaffold_425	151920	4	5.57355
scaffold_459	25164	4	5.57355
scaffold_459	94991	4	5.57355
scaffold_459	131776	4	5.57355
scaffold_459	131795	4	5.57355
scaffold_482	33396	4	13.7338
scaffold_838	16971	4	16.4438
scaffold_506	5193	4	22.7817
scaffold_506	3655	4	22.7817
scaffold_641	6915	4	22.7817
scaffold_897	48173	4	26.8031
scaffold_2222	16224	4	28.6558
scaffold_701	56170	4	32.6613
scaffold_701	57001	4	32.6613
scaffold_1062	16920	4	32.6613
scaffold_729	7403	4	32.6613
scaffold_772	62228	4	38.7982
scaffold_2036	8082	4	38.7982
scaffold_2036	8111	4	38.7982
scaffold_753	7807	4	38.7982
scaffold_1125	32944	4	42.8779
scaffold_1125	32962	4	42.8779
scaffold_1262	16828	4	42.8779
scaffold_1273	11029	4	42.8779
scaffold_1273	11059	4	42.8779
scaffold_1440	2079	4	42.8779
scaffold_1462	24397	4	42.8779
scaffold_1953	9951	4	42.8779
scaffold_761	70767	4	42.8779
scaffold_761	70769	4	42.8779
scaffold_761	70782	4	42.8779
scaffold_761	70800	4	42.8779
scaffold_761	70804	4	42.8779
scaffold_1405	9111	4	45.4111
scaffold_911	50549	4	45.4111
scaffold_1180	19897	4	48.4742
scaffold_1313	9813	4	48.4742
scaffold_1980	9739	4	48.4742
scaffold_1980	9744	4	48.4742
scaffold_495	12131	4	48.4742
scaffold_495	71792	4	48.4742
scaffold_495	71823	4	48.4742
scaffold_1024	22206	4	54.0528
scaffold_1024	22219	4	54.0528
scaffold_1024	22228	4	54.0528
scaffold_1558	4128	4	54.0528
scaffold_895	3400	4	54.0528
scaffold_895	3433	4	54.0528
scaffold_963	48996	4	54.0528
scaffold_971	29404	4	54.0528
scaffold_1078	5788	4	54.0528
scaffold_1078	5864	4	54.0528
scaffold_1571	3367	4	54.0528
scaffold_504	105702	4	54.0528
scaffold_665	57771	4	54.0528
scaffold_665	70953	4	54.0528
scaffold_665	70960	4	54.0528
scaffold_895	3456	4	54.0528
scaffold_416	68363	4	55.9055
scaffold_416	133650	4	55.9055
scaffold_371	39690	4	55.9055
scaffold_317	36737	4	57.7582
scaffold_317	48536	4	57.7582
scaffold_390	41912	4	57.7582
scaffold_390	135158	4	57.7582
scaffold_390	143816	4	57.7582
scaffold_721	74145	4	57.7582
scaffold_827	22273	4	57.7582
scaffold_981	20024	4	57.7582
scaffold_1966	5381	4	57.7582
scaffold_317	139067	4	57.7582
scaffold_373	169830	4	57.7582
scaffold_355	183522	4	59.6109
scaffold_355	77697	4	61.4636
scaffold_25	476031	4	63.3163
scaffold_25	169386	4	65.1691
scaffold_66	345235	4	69.0459
scaffold_66	345236	4	69.0459
scaffold_66	345275	4	69.0459
scaffold_66	289980	4	69.0459
scaffold_66	295458	4	69.0459
scaffold_66	323083	4	69.0459
scaffold_66	249703	4	69.0459
scaffold_66	323120	4	69.0459
scaffold_66	84204	4	71.3519
scaffold_66	84254	4	71.3519
scaffold_185	186185	4	73.5545
scaffold_185	44363	4	73.5545
scaffold_749	62366	4	75.4072
scaffold_98	141812	4	75.4072
scaffold_98	216916	4	75.4072
scaffold_98	272028	4	75.4072
scaffold_735	8130	4	75.4072
scaffold_735	8134	4	75.4072
scaffold_98	272010	4	75.4072
scaffold_98	272118	4	75.4072
scaffold_57	147465	4	79.1177
scaffold_40	436193	4	80.9704
scaffold_40	457141	4	80.9704
scaffold_40	515183	4	80.9704
scaffold_282	174171	4	80.9704
scaffold_282	184395	4	80.9704
scaffold_57	1751	4	80.9704
scaffold_40	135120	4	82.9481
scaffold_40	173645	4	82.9481
scaffold_40	173717	4	82.9481
scaffold_40	173723	4	82.9481
scaffold_40	92105	4	84.9258
scaffold_40	111319	4	84.9258
scaffold_113	44127	4	84.9258
scaffold_183	255698	4	87.1342
scaffold_113	94506	4	87.1342
scaffold_406	148782	4	89.3427
scaffold_406	148801	4	89.3427
scaffold_682	30377	4	91.1954
scaffold_770	37730	4	93.0562
scaffold_784	11637	4	93.0562
scaffold_953	18932	4	93.0562
scaffold_1240	17802	4	93.0562
scaffold_569	117825	4	93.0562
scaffold_1780	7263	4	94.9169
scaffold_1112	31405	4	100.496
scaffold_699	62914	4	100.496
scaffold_959	23818	4	100.496
scaffold_42	367973	4	102.513
scaffold_42	367999	4	102.513
scaffold_42	438560	4	102.513
scaffold_242	25795	4	102.513
scaffold_242	25861	4	102.513
scaffold_742	78896	4	102.513
scaffold_89	134071	4	102.513
scaffold_242	25866	4	102.513
scaffold_242	165524	4	102.513
scaffold_242	165527	4	102.513
scaffold_42	450754	4	102.513
scaffold_42	450774	4	102.513
scaffold_89	120953	4	102.513
scaffold_89	139418	4	102.513
scaffold_136	173753	4	104.531
scaffold_136	189838	4	104.531
scaffold_136	189859	4	104.531
scaffold_42	73506	4	104.531
scaffold_136	81447	4	104.531
scaffold_136	189851	4	104.531
scaffold_136	212256	4	104.531
scaffold_136	228086	4	104.531
scaffold_136	235318	4	104.531
scaffold_42	71107	4	104.531
scaffold_42	280267	4	104.531
scaffold_136	328449	4	108.242
scaffold_369	14918	4	108.242
scaffold_142	137349	4	111.544
scaffold_142	219103	4	111.544
scaffold_142	16466	4	111.544
scaffold_142	60867	4	111.544
scaffold_142	219090	4	111.544
scaffold_119	322566	4	113.804
scaffold_142	343635	4	113.804
scaffold_142	343658	4	113.804
scaffold_142	343685	4	113.804
scaffold_119	315758	4	113.804
scaffold_119	289024	4	115.656
scaffold_200	63846	4	115.656
scaffold_200	105493	4	115.656
scaffold_200	12368	4	115.656
scaffold_200	40792	4	115.656
scaffold_200	49100	4	115.656
scaffold_200	127941	4	115.656
scaffold_200	127958	4	115.656
scaffold_200	127990	4	115.656
scaffold_256	96939	4	115.656
scaffold_366	60454	4	115.656
scaffold_366	190551	4	115.656
scaffold_366	197991	4	115.656
scaffold_341	156911	4	117.509
scaffold_345	133069	4	117.509
scaffold_11	232350	4	117.509
scaffold_259	138157	4	117.509
scaffold_259	138175	4	117.509
scaffold_11	535933	4	117.509
scaffold_11	535953	4	117.509
scaffold_11	535959	4	117.509
scaffold_181	44978	4	119.362
scaffold_351	42137	4	119.362
scaffold_48	73672	4	119.362
scaffold_48	478333	4	119.362
scaffold_49	381416	4	119.362
scaffold_181	95624	4	119.362
scaffold_351	107025	4	119.362
scaffold_48	291364	4	119.362
scaffold_49	181999	4	119.362
scaffold_49	251539	4	119.362
scaffold_49	251544	4	119.362
scaffold_49	399446	4	119.362
scaffold_181	215368	4	121.215
scaffold_35	34431	4	121.215
scaffold_35	34495	4	121.215
scaffold_35	202805	4	121.215
scaffold_35	253794	4	121.215
scaffold_35	257300	4	121.215
scaffold_35	367324	4	121.215
scaffold_35	379640	4	121.215
scaffold_50	332910	4	121.215
scaffold_50	185253	4	121.215
scaffold_213	145708	4	123.067
scaffold_273	68982	4	123.067
scaffold_50	436322	4	123.067
scaffold_545	85213	4	123.067
scaffold_916	28677	4	123.067
scaffold_545	85255	4	123.067
scaffold_545	85260	4	123.067
scaffold_272	109326	4	126.778
scaffold_432	131811	4	126.778
scaffold_432	133697	4	126.778
scaffold_432	131756	4	126.778
scaffold_346	16537	4	129.131
scaffold_638	80902	4	129.131
scaffold_432	29415	4	129.131
scaffold_329	39140	4	133.345
scaffold_329	122916	4	133.345
scaffold_329	122938	4	133.345
scaffold_329	122969	4	133.345
scaffold_391	46588	4	133.345
scaffold_816	64102	4	133.345
scaffold_329	59659	4	133.345
scaffold_816	13796	4	133.345
scaffold_1057	14126	4	137.056
scaffold_1057	14130	4	137.056
scaffold_1444	7959	4	146.423
scaffold_1444	8025	4	146.423
scaffold_297	162079	4	146.423
scaffold_297	182347	4	146.423
scaffold_598	31092	4	148.276
scaffold_598	31093	4	148.276
scaffold_1333	25162	4	150.228
scaffold_1110	50994	4	152.206
scaffold_1110	51047	4	152.206
scaffold_1141	29460	4	154.154
scaffold_588	22517	4	157.993
scaffold_637	55290	4	157.993
scaffold_637	55292	4	157.993
scaffold_860	2791	4	157.993
scaffold_860	9460	4	157.993
scaffold_860	13420	4	157.993
scaffold_588	80488	4	157.993
scaffold_869	12889	4	163.021
scaffold_8	670936	4	165.677
scaffold_8	670974	4	165.677
scaffold_8	637741	4	167.53
scaffold_8	637745	4	167.53
scaffold_8	441538	4	167.53
scaffold_8	441544	4	167.53
scaffold_8	398093	4	169.383
scaffold_2329	2327	4	171.235
scaffold_4	12256	4	176.814
scaffold_4	259872	4	176.814
scaffold_4	12259	4	176.814
scaffold_4	235535	4	176.814
scaffold_585	9677	4	176.814
scaffold_1	71772	4	178.667
scaffold_1	71802	4	178.667
scaffold_1	79917	4	178.667
scaffold_1	607732	4	178.667
scaffold_1	607747	4	178.667
scaffold_1	607753	4	178.667
scaffold_1	778957	4	178.667
scaffold_1	779017	4	178.667
scaffold_1	981030	4	178.667
scaffold_1	1180904	4	178.667
scaffold_1	1247635	4	178.667
scaffold_1	1291825	4	178.667
scaffold_1	1291835	4	178.667
scaffold_1	1291878	4	178.667
scaffold_1	1336522	4	178.667
scaffold_1	1368191	4	178.667
scaffold_1	1436357	4	178.667
scaffold_4	441087	4	178.667
scaffold_4	754948	4	178.667
scaffold_411	44590	4	178.667
scaffold_411	44617	4	178.667
scaffold_411	44637	4	178.667
scaffold_1	342018	4	178.667
scaffold_1	342021	4	178.667
scaffold_1	381154	4	178.667
scaffold_1	634729	4	178.667
scaffold_1	950743	4	178.667
scaffold_2	258983	5	0
scaffold_2	259008	5	0
scaffold_2	396649	5	0
scaffold_2	598679	5	0
scaffold_2	719485	5	0
scaffold_2	737205	5	0
scaffold_2	780318	5	0
scaffold_2	780327	5	0
scaffold_2	901687	5	0
scaffold_21	78355	5	0
scaffold_21	158846	5	0
scaffold_253	54768	5	0
scaffold_30	54709	5	0
scaffold_30	54711	5	0
scaffold_30	54712	5	0
scaffold_30	54713	5	0
scaffold_30	207036	5	0
scaffold_30	218614	5	0
scaffold_149	79071	5	1.8527
scaffold_21	249022	5	1.8527
scaffold_21	477508	5	1.8527
scaffold_21	564162	5	1.8527
scaffold_149	79097	5	1.8527
scaffold_149	213930	5	3.7054
scaffold_149	175703	5	3.7054
scaffold_294	62671	5	5.5581
scaffold_294	79202	5	5.5581
scaffold_362	212996	5	5.5581
scaffold_657	9278	5	5.5581
scaffold_362	121298	5	5.5581
scaffold_657	31639	5	5.5581
scaffold_1213	19796	5	7.4108
scaffold_13	61130	5	7.4108
scaffold_13	104343	5	7.4108
scaffold_13	104351	5	7.4108
scaffold_294	108188	5	7.4108
scaffold_13	398302	5	7.4108
scaffold_13	398309	5	7.4108
scaffold_386	66123	5	7.4108
scaffold_386	66150	5	7.4108
scaffold_386	106667	5	9.2635
scaffold_386	131534	5	9.2635
scaffold_407	153408	5	9.2635
scaffold_417	171431	5	9.2635
scaffold_420	77182	5	9.2635
scaffold_420	77185	5	9.2635
scaffold_420	77195	5	9.2635
scaffold_420	78267	5	9.2635
scaffold_420	119405	5	9.2635
scaffold_164	143410	5	9.2635
scaffold_420	78297	5	9.2635
scaffold_335	213045	5	16.7258
scaffold_62	20149	5	16.7258
scaffold_62	80501	5	16.7258
scaffold_62	443192	5	16.7258
scaffold_62	445786	5	16.7258
scaffold_62	445793	5	16.7258
scaffold_62	317397	5	16.7258
scaffold_62	342739	5	16.7258
scaffold_62	443141	5	16.7258
scaffold_1471	2712	5	18.5785
scaffold_335	146626	5	18.5785
scaffold_244	9615	5	20.4312
scaffold_781	15545	5	20.4312
scaffold_781	23175	5	20.4312
scaffold_781	23179	5	20.4312
scaffold_28	20242	5	20.4312
scaffold_244	82510	5	22.2839
scaffold_244	82511	5	22.2839
scaffold_244	241601	5	25.9944
scaffold_244	254683	5	25.9944
scaffold_374	167537	5	27.8471
scaffold_1171	7360	5	29.6998
scaffold_1171	7361	5	29.6998
scaffold_1171	7364	5	29.6998
scaffold_374	24221	5	29.6998
scaffold_374	35479	5	29.6998
scaffold_609	83632	5	29.6998
scaffold_609	122441	5	29.6998
scaffold_95	245561	5	29.6998
scaffold_95	305417	5	29.6998
scaffold_95	305441	5	29.6998
scaffold_95	305458	5	29.6998
scaffold_95	31402	5	33.4103
scaffold_220	207115	5	39.7417
scaffold_224	15985	5	49.8799
scaffold_224	18678	5	49.8799
scaffold_224	121785	5	49.8799
scaffold_224	18710	5	49.8799
scaffold_224	18735	5	49.8799
scaffold_224	22684	5	49.8799
scaffold_224	22692	5	49.8799
scaffold_224	22693	5	49.8799
scaffold_26	469819	5	51.8393
scaffold_26	410144	5	51.8393
scaffold_26	410157	5	51.8393
scaffold_26	495689	5	51.8393
scaffold_442	52143	5	51.8393
scaffold_224	6509	5	51.8393
scaffold_26	410118	5	51.8393
scaffold_442	8254	5	51.8393
scaffold_442	69266	5	51.8393
scaffold_26	1825	5	53.7986
scaffold_400	15103	5	53.7986
scaffold_400	15127	5	53.7986
scaffold_400	15137	5	53.7986
scaffold_400	15138	5	53.7986
scaffold_400	15142	5	53.7986
scaffold_415	67646	5	53.7986
scaffold_415	67706	5	53.7986
scaffold_500	16175	5	53.7986
scaffold_852	3531	5	53.7986
scaffold_26	44677	5	53.7986
scaffold_26	44680	5	53.7986
scaffold_26	44707	5	53.7986
scaffold_26	44722	5	53.7986
scaffold_26	44747	5	53.7986
scaffold_400	78688	5	53.7986
scaffold_26	95290	5	53.7986
scaffold_26	132926	5	53.7986
scaffold_415	2728	5	53.7986
scaffold_400	141260	5	55.6513
scaffold_208	197901	5	59.3618
scaffold_208	278133	5	59.3618
scaffold_189	77279	5	61.406
scaffold_189	77291	5	61.406
scaffold_189	77318	5	61.406
scaffold_189	112187	5	61.406
scaffold_189	141321	5	61.406
scaffold_189	141383	5	61.406
scaffold_189	182202	5	61.406
scaffold_189	182221	5	61.406
scaffold_211	105039	5	61.406
scaffold_211	105069	5	61.406
scaffold_211	222541	5	61.406
scaffold_211	242493	5	61.406
scaffold_211	242501	5	61.406
scaffold_211	242505	5	61.406
scaffold_211	242527	5	61.406
scaffold_211	285772	5	61.406
scaffold_211	285795	5	61.406
scaffold_211	293102	5	61.406
scaffold_361	86406	5	61.406
scaffold_393	19760	5	61.406
scaffold_393	104666	5	61.406
scaffold_413	90425	5	61.406
scaffold_413	94733	5	61.406
scaffold_413	102936	5	61.406
scaffold_452	52734	5	61.406
scaffold_515	5294	5	61.406
scaffold_515	108648	5	61.406
scaffold_515	108695	5	61.406
scaffold_515	108699	5	61.406
scaffold_413	94413	5	61.406
scaffold_1075	10141	5	63.9424
scaffold_1096	30186	5	63.9424
scaffold_1075	48611	5	63.9424
scaffold_1788	9545	5	63.9424
scaffold_454	28399	5	63.9424
scaffold_454	28442	5	63.9424
scaffold_86	79309	5	63.9424
scaffold_1156	38219	5	66.3439
scaffold_1256	5409	5	66.3439
scaffold_1256	27096	5	66.3439
scaffold_919	20011	5	66.3439
scaffold_919	41246	5	66.3439
scaffold_810	30393	5	68.1966
scaffold_810	30396	5	68.1966
scaffold_810	30414	5	68.1966
scaffold_134	166720	5	70.0493
scaffold_134	268628	5	70.0493
scaffold_134	271419	5	70.0493
scaffold_134	282948	5	70.0493
scaffold_134	310284	5	70.0493
scaffold_134	170221	5	70.0493
scaffold_134	113182	5	71.902
scaffold_201	267189	5	71.902
scaffold_201	267190	5	71.902
scaffold_201	287069	5	71.902
scaffold_2237	3290	5	71.902
scaffold_544	49529	5	71.902
scaffold_560	37516	5	71.902
scaffold_560	37550	5	71.902
scaffold_560	126526	5	71.902
scaffold_587	69211	5	71.902
scaffold_78	23081	5	79.3644
scaffold_161	129625	5	83.0847
scaffold_161	138507	5	83.0847
scaffold_161	203150	5	83.0847
scaffold_161	203156	5	83.0847
scaffold_33	49357	5	83.0847
scaffold_33	174140	5	83.0847
scaffold_33	181612	5	83.0847
scaffold_33	181630	5	83.0847
scaffold_33	360441	5	83.0847
scaffold_399	60273	5	83.0847
scaffold_399	164896	5	83.0847
scaffold_399	164916	5	83.0847
scaffold_423	20459	5	83.0847
scaffold_539	32624	5	83.0847
scaffold_539	32634	5	83.0847
scaffold_539	32651	5	83.0847
scaffold_539	65348	5	83.0847
scaffold_78	379838	5	83.0847
scaffold_78	379867	5	83.0847
scaffold_99	46136	5	83.0847
scaffold_99	87169	5	83.0847
scaffold_1923	9643	5	83.0847
scaffold_33	49343	5	83.0847
scaffold_33	242989	5	83.0847
scaffold_33	243005	5	83.0847
scaffold_33	261955	5	83.0847
scaffold_352	210945	5	83.0847
scaffold_78	246604	5	83.0847
scaffold_78	246662	5	83.0847
scaffold_78	246675	5	83.0847
scaffold_529	67169	5	84.9472
scaffold_529	87902	5	84.9472
scaffold_529	111023	5	84.9472
scaffold_99	195557	5	84.9472
scaffold_99	195571	5	84.9472
scaffold_99	262634	5	84.9472
scaffold_61	100510	5	86.9178
scaffold_450	71196	5	86.9178
scaffold_450	71212	5	86.9178
scaffold_450	71213	5	86.9178
scaffold_450	105781	5	86.9178
scaffold_450	105823	5	86.9178
scaffold_61	65651	5	86.9178
scaffold_61	69515	5	86.9178
scaffold_61	189057	5	86.9178
scaffold_1094	33697	5	92.6183
scaffold_1094	33720	5	92.6183
scaffold_1690	8221	5	92.6183
scaffold_61	270167	5	92.6183
scaffold_61	306183	5	92.6183
scaffold_61	444430	5	92.6183
scaffold_756	47524	5	92.6183
scaffold_756	47554	5	92.6183
scaffold_756	81780	5	92.6183
scaffold_756	81805	5	92.6183
scaffold_756	81811	5	92.6183
scaffold_756	81826	5	92.6183
scaffold_279	150522	5	92.6183
scaffold_61	465512	5	92.6183
scaffold_61	465531	5	92.6183
scaffold_1043	20225	5	96.3318
scaffold_110	76779	5	96.3318
scaffold_835	13336	5	101.919
scaffold_525	12855	5	104.429
scaffold_278	158311	5	106.931
scaffold_278	159384	5	106.931
scaffold_525	111480	5	106.931
scaffold_381	97513	5	108.787
scaffold_20	12200	5	110.643
scaffold_381	3754	5	110.643
scaffold_381	178075	5	110.643
scaffold_381	178089	5	110.643
scaffold_20	342337	5	114.353
scaffold_1217	11747	5	119.932
scaffold_397	172217	5	121.784
scaffold_141	79889	5	123.637
scaffold_141	283922	5	123.637
scaffold_104	206648	5	125.49
scaffold_146	64570	5	125.49
scaffold_1735	13824	5	127.343
scaffold_382	17536	5	127.343
scaffold_382	17565	5	127.343
scaffold_382	17568	5	127.343
scaffold_382	163352	5	127.343
scaffold_162	184190	5	127.343
scaffold_284	151813	5	127.343
scaffold_162	273048	5	129.195
scaffold_162	273050	5	129.195
scaffold_162	329508	5	129.195
scaffold_1228	19268	5	134.774
scaffold_1228	29479	5	134.774
scaffold_212	46089	5	134.774
scaffold_44	303590	5	134.774
scaffold_44	303626	5	134.774
scaffold_1228	29457	5	134.774
scaffold_126	193392	5	134.774
scaffold_212	45768	5	134.774
scaffold_44	432982	5	134.774
scaffold_44	443555	5	134.774
scaffold_109	28329	6	0
scaffold_109	85622	6	0
scaffold_109	119662	6	0
scaffold_109	159718	6	0
scaffold_109	305275	6	0
scaffold_531	1413	6	0
scaffold_109	282553	6	0
scaffold_109	282622	6	0
scaffold_169	35253	6	2.14472
scaffold_169	196816	6	2.14472
scaffold_222	225216	6	2.14472
scaffold_222	225221	6	2.14472
scaffold_193	210982	6	4.20473
scaffold_193	277669	6	4.20473
scaffold_193	7622	6	6.05743
scaffold_193	21639	6	6.05743
scaffold_285	145115	6	7.91013
scaffold_285	145182	6	7.91013
scaffold_262	185104	6	7.91013
scaffold_285	22165	6	7.91013
scaffold_285	22210	6	7.91013
scaffold_285	30282	6	7.91013
scaffold_285	30305	6	7.91013
scaffold_285	30307	6	7.91013
scaffold_285	30316	6	7.91013
scaffold_285	30319	6	7.91013
scaffold_285	31070	6	7.91013
scaffold_285	31073	6	7.91013
scaffold_285	33915	6	7.91013
scaffold_285	45054	6	7.91013
scaffold_285	51378	6	7.91013
scaffold_296	149080	6	7.91013
scaffold_398	145979	6	9.76283
scaffold_473	54491	6	9.76283
scaffold_77	137093	6	9.76283
scaffold_285	216221	6	9.76283
scaffold_353	99121	6	9.76283
scaffold_398	145947	6	9.76283
scaffold_473	26410	6	9.76283
scaffold_660	58652	6	11.6155
scaffold_451	79350	6	13.4682
scaffold_451	101608	6	13.4682
scaffold_173	49169	6	15.3209
scaffold_451	150863	6	15.3209
scaffold_173	66532	6	17.2448
scaffold_173	66536	6	17.2448
scaffold_173	66560	6	17.2448
scaffold_490	19335	6	19.2859
scaffold_221	247782	6	19.2859
scaffold_490	79971	6	19.2859
scaffold_490	79994	6	19.2859
scaffold_221	251983	6	19.2859
scaffold_490	48679	6	19.2859
scaffold_46	85497	6	21.2655
scaffold_46	445850	6	21.2655
scaffold_46	473575	6	23.3628
scaffold_38	415522	6	27.3189
scaffold_38	94192	6	31.0294
scaffold_251	210557	6	32.8821
scaffold_251	96706	6	34.7856
scaffold_251	96741	6	34.7856
scaffold_251	1715	6	36.7542
scaffold_251	32204	6	36.7542
scaffold_315	169936	6	36.7542
scaffold_315	169937	6	36.7542
scaffold_251	1682	6	36.7542
scaffold_251	32651	6	36.7542
scaffold_251	32657	6	36.7542
scaffold_251	32679	6	36.7542
scaffold_315	192175	6	36.7542
scaffold_570	38304	6	38.6758
scaffold_116	161887	6	38.6758
scaffold_116	161888	6	38.6758
scaffold_313	174608	6	40.5351
scaffold_313	105962	6	40.5351
scaffold_140	75729	6	42.3943
scaffold_140	228261	6	44.247
scaffold_302	184497	6	46.1298
scaffold_187	295281	6	48.1307
scaffold_187	39092	6	48.1307
scaffold_187	88642	6	48.1307
scaffold_187	88665	6	48.1307
scaffold_187	218096	6	48.1307
scaffold_249	85365	6	48.1307
scaffold_249	101950	6	48.1307
scaffold_566	106191	6	48.1307
scaffold_858	8834	6	48.1307
scaffold_858	8843	6	48.1307
scaffold_209	20793	6	50.1026
scaffold_396	153572	6	50.1026
scaffold_396	153597	6	50.1026
scaffold_209	51398	6	50.1026
scaffold_209	126202	6	50.1026
scaffold_243	114924	6	52.077
scaffold_243	114975	6	52.077
scaffold_243	255882	6	52.077
scaffold_388	188706	6	52.077
scaffold_396	36457	6	52.077
scaffold_396	36526	6	52.077
scaffold_243	2307	6	52.077
scaffold_204	45730	6	55.9098
scaffold_76	447028	6	55.9098
scaffold_204	97506	6	55.9098
scaffold_76	110371	6	57.7625
scaffold_76	376846	6	57.7625
scaffold_255	117976	6	61.474
scaffold_325	217208	6	61.474
scaffold_658	70858	6	61.474
scaffold_728	21521	6	61.474
scaffold_81	85588	6	63.3277
scaffold_180	291666	6	65.1804
scaffold_81	143910	6	65.1804
scaffold_81	330345	6	65.1804
scaffold_81	330404	6	65.1804
scaffold_81	343607	6	65.1804
scaffold_81	343622	6	65.1804
scaffold_180	166510	6	67.0331
scaffold_180	166579	6	67.0331
scaffold_1079	34112	6	74.5062
scaffold_350	194189	6	74.5062
scaffold_801	22936	6	74.5062
scaffold_928	12254	6	74.5062
scaffold_350	87795	6	74.5062
scaffold_928	13096	6	74.5062
scaffold_928	19818	6	74.5062
scaffold_132	80298	6	76.3694
scaffold_132	92106	6	76.3694
scaffold_326	209689	6	76.3694
scaffold_53	218975	6	76.3694
scaffold_53	270022	6	76.3694
scaffold_53	309241	6	76.3694
scaffold_132	59845	6	76.3694
scaffold_132	98287	6	76.3694
scaffold_132	208416	6	76.3694
scaffold_53	219001	6	76.3694
scaffold_53	341774	6	76.3694
scaffold_530	17629	6	76.3694
scaffold_130	296117	6	80.1954
scaffold_130	17297	6	82.5837
scaffold_67	36051	6	82.5837
scaffold_67	225072	6	84.857
scaffold_67	231259	6	84.857
scaffold_260	9194	6	87.186
scaffold_260	107568	6	87.186
scaffold_260	107610	6	87.186
scaffold_67	334199	6	87.186
scaffold_67	449488	6	87.186
scaffold_67	449491	6	87.186
scaffold_260	126218	6	87.186
scaffold_196	75233	6	89.8278
scaffold_196	80566	6	89.8278
scaffold_228	194017	6	89.8278
scaffold_458	24933	6	89.8278
scaffold_458	24967	6	89.8278
scaffold_196	66188	6	89.8278
scaffold_216	178405	6	89.8278
scaffold_458	4805	6	89.8278
scaffold_779	38119	6	89.8278
scaffold_51	188982	6	92.5092
scaffold_505	64815	6	92.5092
scaffold_505	64856	6	92.5092
scaffold_51	98029	6	92.5092
scaffold_51	139242	6	92.5092
scaffold_192	151915	6	99.3552
scaffold_192	106894	6	103.281
scaffold_192	106919	6	103.281
scaffold_234	56617	6	103.281
scaffold_234	56630	6	103.281
scaffold_234	143605	6	103.281
scaffold_234	56615	6	103.281
scaffold_234	56618	6	103.281
scaffold_108	369492	6	107.238
scaffold_108	79314	6	109.131
scaffold_108	79327	6	109.131
scaffold_108	79329	6	109.131
scaffold_108	217999	6	109.131
scaffold_27	21087	6	109.131
scaffold_27	21089	6	109.131
scaffold_108	217950	6	109.131
scaffold_27	80770	6	110.983
scaffold_27	80779	6	110.983
scaffold_27	80780	6	110.983
scaffold_27	80781	6	110.983
scaffold_27	80812	6	110.983
scaffold_27	117068	6	110.983
scaffold_27	67898	6	110.983
scaffold_27	258649	6	112.836
scaffold_27	258724	6	112.836
scaffold_27	258725	6	112.836
scaffold_27	442193	6	114.689
scaffold_27	442197	6	114.689
scaffold_27	467474	6	114.689
scaffold_74	406297	6	114.689
scaffold_74	406317	6	114.689
scaffold_27	526138	6	114.689
scaffold_152	153761	6	120.267
scaffold_152	255137	6	120.267
scaffold_316	55729	6	120.267
scaffold_316	136292	6	120.267
scaffold_22	15285	6	123.377
scaffold_139	347956	6	123.377
scaffold_22	1660	6	123.377
scaffold_22	73149	6	126.344
scaffold_22	287177	6	128.197
scaffold_22	287212	6	128.197
scaffold_22	350815	6	128.197
scaffold_22	489720	6	128.197
scaffold_22	536748	6	128.197
scaffold_22	536772	6	128.197
scaffold_65	365070	6	128.197
scaffold_65	433232	6	128.197
scaffold_22	293942	6	128.197
scaffold_354	22099	6	130.05
scaffold_65	228584	6	130.05
scaffold_65	365592	6	130.05
scaffold_676	53079	6	130.05
scaffold_65	228594	6	130.05
scaffold_135	41001	6	131.903
scaffold_734	15987	6	131.903
scaffold_128	53333	6	137.481
scaffold_128	229934	6	137.481
scaffold_229	272689	6	137.481
scaffold_75	422880	6	137.481
scaffold_75	422922	6	137.481
scaffold_549	24685	7	0
scaffold_549	55610	7	0
scaffold_184	32316	7	0
scaffold_549	99112	7	0
scaffold_238	264552	7	1.8527
scaffold_348	43511	7	1.8527
scaffold_348	158778	7	1.8527
scaffold_348	18408	7	1.8527
scaffold_348	116994	7	1.8527
scaffold_323	148521	7	5.5632
scaffold_323	155086	7	5.5632
scaffold_323	104606	7	5.5632
scaffold_323	150630	7	5.5632
scaffold_323	155064	7	5.5632
scaffold_359	43826	7	9.2737
scaffold_359	43853	7	9.2737
scaffold_521	29137	7	11.1275
scaffold_521	122079	7	11.1275
scaffold_521	58023	7	11.1275
scaffold_521	95069	7	11.1275
scaffold_453	130822	7	14.8566
scaffold_412	175832	7	20.4529
scaffold_412	175889	7	20.4529
scaffold_671	25610	7	22.3056
scaffold_614	69998	7	26.0161
scaffold_614	70002	7	26.0161
scaffold_614	70012	7	26.0161
scaffold_466	11918	7	27.8688
scaffold_466	11929	7	27.8688
scaffold_661	63513	7	27.8688
scaffold_287	162874	7	31.5793
scaffold_287	217399	7	31.5793
scaffold_301	114183	7	33.432
scaffold_301	178882	7	33.432
scaffold_363	86820	7	33.432
scaffold_363	86868	7	33.432
scaffold_363	86878	7	33.432
scaffold_363	90050	7	33.432
scaffold_363	90505	7	33.432
scaffold_363	90539	7	33.432
scaffold_363	90545	7	33.432
scaffold_410	159074	7	33.432
scaffold_377	65257	7	37.1425
scaffold_159	170382	7	38.9952
scaffold_159	174721	7	38.9952
scaffold_159	174728	7	38.9952
scaffold_159	252556	7	38.9952
scaffold_312	57746	7	38.9952
scaffold_312	194162	7	38.9952
scaffold_312	228975	7	38.9952
scaffold_336	129653	7	38.9952
scaffold_336	216488	7	38.9952
scaffold_377	14848	7	38.9952
scaffold_677	74528	7	38.9952
scaffold_705	75398	7	38.9952
scaffold_758	21001	7	38.9952
scaffold_867	58393	7	38.9952
scaffold_917	26266	7	38.9952
scaffold_917	31604	7	38.9952
scaffold_917	33704	7	38.9952
scaffold_477	42444	7	40.8479
scaffold_477	79786	7	42.7006
scaffold_477	92698	7	42.7006
scaffold_477	92715	7	42.7006
scaffold_522	80194	7	42.7006
scaffold_522	80257	7	42.7006
scaffold_477	63109	7	42.7006
scaffold_477	63116	7	42.7006
scaffold_1035	24855	7	44.5533
scaffold_241	134340	7	44.5533
scaffold_5	146109	7	44.5533
scaffold_5	191567	7	44.5533
scaffold_5	768849	7	44.5533
scaffold_5	768863	7	44.5533
scaffold_5	768903	7	44.5533
scaffold_85	109811	7	44.5533
scaffold_85	328408	7	44.5533
scaffold_85	328416	7	44.5533
scaffold_1208	20474	7	44.5533
scaffold_85	307262	7	44.5533
scaffold_627	13680	7	46.406
scaffold_627	13716	7	46.406
scaffold_627	44423	7	46.406
scaffold_627	44429	7	46.406
scaffold_627	44463	7	46.406
scaffold_627	104332	7	46.406
scaffold_247	115569	7	48.2587
scaffold_247	139363	7	50.1114
scaffold_247	191783	7	50.1114
scaffold_250	201501	7	50.1114
scaffold_307	98089	7	50.1114
scaffold_307	176725	7	50.1114
scaffold_523	77770	7	50.1114
scaffold_723	49741	7	50.1114
scaffold_723	49744	7	50.1114
scaffold_741	32273	7	50.1114
scaffold_741	32278	7	50.1114
scaffold_944	47283	7	50.1114
scaffold_944	53659	7	50.1114
scaffold_523	15663	7	50.1114
scaffold_944	24410	7	50.1114
scaffold_277	26546	7	51.9641
scaffold_277	26593	7	51.9641
scaffold_277	77996	7	51.9641
scaffold_277	120878	7	51.9641
scaffold_277	178538	7	51.9641
scaffold_277	178571	7	51.9641
scaffold_277	240407	7	51.9641
scaffold_455	145016	7	51.9641
scaffold_277	257131	7	53.8168
scaffold_365	186283	7	55.6695
scaffold_467	49469	7	57.5222
[truncated: 50 more rows]

## Sheet: Family10
Scaffold ID	scaffold position	LG	genetic position
scaffold_199	205694	1	0
scaffold_7	62155	1	0
scaffold_7	680971	1	0
scaffold_176	269024	1	6.89265
scaffold_7	281533	1	6.89265
scaffold_1018	4251	1	12.5314
scaffold_983	21561	1	12.5314
scaffold_983	21604	1	12.5314
scaffold_194	283166	1	20.1908
scaffold_194	156964	1	23.7534
scaffold_194	175995	1	23.7534
scaffold_1557	12698	1	26.6254
scaffold_194	5383	1	26.6254
scaffold_520	65666	1	29.0656
scaffold_151	343225	1	36.2168
scaffold_463	133320	1	42.5484
scaffold_463	133321	1	42.5484
scaffold_177	10156	1	42.5484
scaffold_463	118907	1	42.5484
scaffold_463	154037	1	42.5484
scaffold_177	273315	1	49.0091
scaffold_177	263112	1	49.0091
scaffold_177	273345	1	49.0091
scaffold_124	265107	1	56.9129
scaffold_124	43952	1	59.0842
scaffold_308	61188	1	59.0842
scaffold_803	18943	1	59.0842
scaffold_308	147200	1	61.7228
scaffold_675	3718	1	61.7228
scaffold_675	48535	1	61.7228
scaffold_675	48553	1	61.7228
scaffold_536	53304	1	64.7074
scaffold_360	88298	1	71.1529
scaffold_80	102920	1	71.1529
scaffold_80	102946	1	71.1529
scaffold_80	102958	1	71.1529
scaffold_80	225207	1	71.1529
scaffold_80	324183	1	71.1529
scaffold_80	324236	1	71.1529
scaffold_80	324247	1	71.1529
scaffold_80	185111	1	71.1529
scaffold_300	95567	1	76.9425
scaffold_300	140786	1	76.9425
scaffold_54	321888	1	81.6731
scaffold_54	360420	1	81.6731
scaffold_56	272409	1	81.6731
scaffold_56	285339	1	81.6731
scaffold_300	237394	1	81.6731
scaffold_300	244278	1	81.6731
scaffold_300	244294	1	81.6731
scaffold_300	244358	1	81.6731
scaffold_54	37501	1	81.6731
scaffold_54	37521	1	81.6731
scaffold_54	86746	1	81.6731
scaffold_54	118273	1	81.6731
scaffold_54	118283	1	81.6731
scaffold_54	168841	1	81.6731
scaffold_54	394918	1	81.6731
scaffold_56	134146	1	81.6731
scaffold_56	272384	1	81.6731
scaffold_1542	3734	1	84.3794
scaffold_1542	8755	1	84.3794
scaffold_613	88296	1	84.3794
scaffold_659	15887	1	84.3794
scaffold_1542	3723	1	84.3794
scaffold_613	88319	1	84.3794
scaffold_613	100406	1	84.3794
scaffold_488	107388	1	88.0857
scaffold_488	12018	1	88.0857
scaffold_659	70707	1	88.0857
scaffold_659	70735	1	88.0857
scaffold_342	208618	1	92.5022
scaffold_342	125567	1	92.5022
scaffold_165	99036	1	95.1586
scaffold_165	149716	1	99.9787
scaffold_165	149745	1	99.9787
scaffold_107	75414	1	102.053
scaffold_107	238062	1	102.053
scaffold_107	281529	1	102.053
scaffold_165	269274	1	102.053
scaffold_29	624	1	102.053
scaffold_29	84733	1	102.053
scaffold_29	84734	1	102.053
scaffold_29	200213	1	102.053
scaffold_29	297086	1	102.053
scaffold_107	350566	1	102.053
scaffold_1190	6618	1	102.053
scaffold_129	169896	1	102.053
scaffold_129	288042	1	102.053
scaffold_165	269290	1	102.053
scaffold_165	269318	1	102.053
scaffold_29	297120	1	102.053
scaffold_198	298885	1	104.109
scaffold_29	511674	1	104.109
scaffold_29	511687	1	104.109
scaffold_29	518707	1	104.109
scaffold_707	23270	1	104.109
scaffold_198	298765	1	104.109
scaffold_198	298777	1	104.109
scaffold_198	298787	1	104.109
scaffold_198	298804	1	104.109
scaffold_198	298809	1	104.109
scaffold_198	298858	1	104.109
scaffold_198	298859	1	104.109
scaffold_198	298866	1	104.109
scaffold_198	298871	1	104.109
scaffold_198	298879	1	104.109
scaffold_198	298901	1	104.109
scaffold_707	23220	1	104.109
scaffold_198	189519	1	106.165
scaffold_198	200474	1	106.165
scaffold_198	200520	1	106.165
scaffold_198	200511	1	106.165
scaffold_43	18167	1	110.052
scaffold_43	395964	1	110.052
scaffold_198	63469	1	110.052
scaffold_43	155311	1	110.052
scaffold_43	246725	1	110.052
scaffold_43	437417	1	110.052
scaffold_64	64899	1	113.015
scaffold_64	198305	1	113.015
scaffold_64	198327	1	113.015
scaffold_64	240789	1	113.015
scaffold_64	428812	1	113.015
scaffold_64	64874	1	113.015
scaffold_64	240794	1	113.015
scaffold_64	322235	1	113.015
scaffold_64	433388	1	113.015
scaffold_41	160458	1	118.289
scaffold_41	187449	1	118.289
scaffold_64	469369	1	118.289
scaffold_41	37869	1	118.289
scaffold_41	187457	1	118.289
scaffold_41	421989	1	121.601
scaffold_32	456093	1	121.601
scaffold_41	442358	1	121.601
scaffold_32	459098	1	121.601
scaffold_32	189730	1	123.662
scaffold_32	322150	1	123.662
scaffold_32	31185	1	123.662
scaffold_339	163325	1	123.662
scaffold_339	163340	1	123.662
scaffold_339	172757	1	123.662
scaffold_118	219758	1	125.875
scaffold_118	293122	1	125.875
scaffold_118	102798	1	125.875
scaffold_55	50395	1	129.575
scaffold_55	83394	1	129.575
scaffold_55	145778	1	129.575
scaffold_55	206946	1	129.575
scaffold_55	322549	1	129.575
scaffold_55	89743	1	129.575
scaffold_55	322572	1	129.575
scaffold_379	51158	1	133.117
scaffold_379	51184	1	133.117
scaffold_379	72440	1	133.117
scaffold_55	17346	1	133.117
scaffold_55	25010	1	133.117
scaffold_55	24994	1	133.117
scaffold_55	25030	1	133.117
scaffold_766	31587	1	135.93
scaffold_766	66947	1	135.93
scaffold_92	4681	1	135.93
scaffold_92	135068	1	135.93
scaffold_766	66446	1	135.93
scaffold_92	35329	1	135.93
scaffold_71	270739	1	145.354
scaffold_71	91504	1	145.354
scaffold_71	155309	1	145.354
scaffold_71	155311	1	145.354
scaffold_71	155328	1	145.354
scaffold_179	42382	1	145.354
scaffold_179	113875	1	145.354
scaffold_179	113918	1	145.354
scaffold_71	304294	1	145.354
scaffold_71	305190	1	153.917
scaffold_179	188752	1	156.044
scaffold_179	209331	1	156.044
scaffold_179	209347	1	156.044
scaffold_179	238558	1	156.044
scaffold_421	58805	1	156.044
scaffold_421	125224	1	156.044
scaffold_71	143732	1	156.044
scaffold_59	192747	1	161.062
scaffold_59	192748	1	161.062
scaffold_59	192755	1	161.062
scaffold_59	192784	1	161.062
scaffold_59	220392	1	161.062
scaffold_59	229452	1	161.062
scaffold_59	351266	1	161.062
scaffold_59	393308	1	161.062
scaffold_59	421279	1	169.073
scaffold_160	104283	1	169.073
scaffold_59	921	1	177.168
scaffold_59	940	1	177.168
scaffold_59	942	1	177.168
scaffold_59	958	1	177.168
scaffold_59	964	1	177.168
scaffold_59	130339	1	177.168
scaffold_59	77616	1	177.168
scaffold_59	288364	1	177.168
scaffold_421	39565	1	177.168
scaffold_160	192056	1	180.6
scaffold_160	222932	1	180.6
scaffold_160	265539	1	180.6
scaffold_568	9933	1	180.6
scaffold_568	18374	1	180.6
scaffold_568	23903	1	180.6
scaffold_568	23925	1	180.6
scaffold_568	25292	1	180.6
scaffold_568	25359	1	180.6
scaffold_568	57407	1	180.6
scaffold_568	88322	1	180.6
scaffold_160	163601	1	180.6
scaffold_147	195351	1	183.145
scaffold_147	195320	1	183.145
scaffold_59	436795	1	183.145
scaffold_384	129355	1	189.57
scaffold_384	194832	1	194.379
scaffold_100	329573	1	196.646
scaffold_100	272815	1	196.646
scaffold_100	306422	1	196.646
scaffold_100	306473	1	196.646
scaffold_100	329575	1	196.646
scaffold_100	382399	1	196.646
scaffold_100	57038	1	199.334
scaffold_100	57056	1	199.334
scaffold_100	65426	1	199.334
scaffold_100	200351	1	199.334
scaffold_100	50652	1	199.334
scaffold_100	199877	1	199.334
scaffold_100	199917	1	199.334
scaffold_100	200289	1	199.334
scaffold_100	200345	1	199.334
scaffold_236	1063	1	201.824
scaffold_236	163755	1	201.824
scaffold_236	163816	1	201.824
scaffold_236	163820	1	201.824
scaffold_236	177854	1	201.824
scaffold_236	189932	1	201.824
scaffold_763	26859	1	201.824
scaffold_479	21750	1	205.713
scaffold_479	105951	1	205.713
scaffold_167	318353	1	205.713
scaffold_479	123911	1	205.713
scaffold_428	41581	1	208.277
scaffold_428	55105	1	208.277
scaffold_428	79859	1	208.277
scaffold_428	79875	1	208.277
scaffold_225	139978	1	210.387
scaffold_1038	33134	1	213.817
scaffold_133	104557	1	213.817
scaffold_133	104571	1	213.817
scaffold_133	104600	1	213.817
scaffold_133	104612	1	213.817
scaffold_133	104625	1	213.817
scaffold_133	104628	1	213.817
scaffold_133	304952	1	213.817
scaffold_133	304955	1	213.817
scaffold_1536	17713	1	213.817
scaffold_1936	11976	1	213.817
scaffold_492	84032	1	213.817
scaffold_730	50919	1	213.817
scaffold_730	50935	1	213.817
scaffold_796	65941	1	213.817
scaffold_1521	12329	1	213.817
scaffold_519	34977	1	213.817
scaffold_747	13797	1	213.817
scaffold_215	90611	1	215.873
scaffold_215	199608	1	215.873
scaffold_215	227101	1	215.873
scaffold_215	227161	1	215.873
scaffold_215	227634	1	215.873
scaffold_215	227670	1	215.873
scaffold_248	68476	1	215.873
scaffold_248	57466	1	217.93
scaffold_248	102099	1	217.93
scaffold_248	129772	1	217.93
scaffold_258	117228	1	217.93
scaffold_258	234401	1	217.93
scaffold_344	49776	1	217.93
scaffold_344	97462	1	217.93
scaffold_344	153931	1	217.93
scaffold_344	153954	1	217.93
scaffold_248	244348	1	217.93
scaffold_258	259676	1	217.93
scaffold_1310	14176	1	219.988
scaffold_344	7266	1	219.988
scaffold_424	18692	1	219.988
scaffold_424	38143	1	219.988
scaffold_424	114137	1	219.988
scaffold_424	114168	1	219.988
scaffold_424	114182	1	219.988
scaffold_513	76110	1	222.046
scaffold_513	76111	1	222.046
scaffold_642	10905	1	222.046
scaffold_642	55374	1	222.046
scaffold_508	35597	1	224.102
scaffold_508	35598	1	224.102
scaffold_190	255506	1	226.158
scaffold_190	281464	1	226.158
scaffold_190	281467	1	226.158
scaffold_190	281482	1	226.158
scaffold_190	296531	1	226.158
scaffold_190	296536	1	226.158
scaffold_190	296546	1	226.158
scaffold_190	314464	1	226.158
scaffold_508	108484	1	226.158
scaffold_508	109030	1	226.158
scaffold_508	85857	1	226.158
scaffold_508	90911	1	226.158
scaffold_508	90912	1	226.158
scaffold_190	171538	1	229.59
scaffold_190	173941	1	229.59
scaffold_190	29735	1	231.656
scaffold_190	113198	1	231.656
scaffold_190	128274	1	231.656
scaffold_97	15509	1	231.656
scaffold_97	15525	1	231.656
scaffold_97	115927	1	231.656
scaffold_97	149726	1	233.719
scaffold_97	149754	1	233.719
scaffold_97	175779	1	233.719
scaffold_97	188110	1	233.719
scaffold_97	311162	1	233.719
scaffold_97	148839	1	233.719
scaffold_97	175793	1	233.719
scaffold_97	229769	1	233.719
scaffold_97	332712	1	233.719
scaffold_15	82955	1	235.789
scaffold_97	397794	1	235.789
scaffold_15	187482	1	237.86
scaffold_15	209686	1	237.86
scaffold_15	237071	1	237.86
scaffold_15	175887	1	237.86
scaffold_15	175889	1	237.86
scaffold_15	451115	1	239.922
scaffold_15	575210	1	239.922
scaffold_283	93367	1	243.702
scaffold_283	93421	1	243.702
scaffold_283	86078	1	246.105
scaffold_150	259242	1	246.105
scaffold_150	259249	1	246.105
scaffold_150	259255	1	246.105
scaffold_150	307045	1	246.105
scaffold_283	14791	1	246.105
scaffold_283	43464	1	246.105
scaffold_90	69883	1	246.105
scaffold_90	189451	1	246.105
scaffold_90	289995	1	246.105
scaffold_150	113930	1	246.105
scaffold_150	113993	1	246.105
scaffold_283	139322	1	246.105
scaffold_94	20714	1	248.165
scaffold_94	190401	1	248.165
scaffold_94	208664	1	248.165
scaffold_94	208697	1	248.165
scaffold_94	208698	1	248.165
scaffold_94	239788	1	248.165
scaffold_94	244000	1	248.165
scaffold_288	222347	1	250.221
scaffold_37	34477	1	250.221
scaffold_37	79337	1	250.221
scaffold_37	79386	1	250.221
scaffold_37	430663	1	250.221
scaffold_37	431845	1	250.221
scaffold_37	437974	1	250.221
scaffold_37	437983	1	250.221
scaffold_805	43858	1	250.221
scaffold_850	26452	1	250.221
scaffold_94	328233	1	250.221
scaffold_1425	1306	1	250.221
scaffold_37	117314	1	250.221
scaffold_805	3656	1	250.221
scaffold_850	23488	1	250.221
scaffold_37	448881	1	250.221
scaffold_288	32503	1	252.277
scaffold_496	44342	1	254.333
scaffold_686	32663	1	254.333
scaffold_73	286408	1	254.333
scaffold_73	293775	1	254.333
scaffold_73	293836	1	254.333
scaffold_496	44339	1	254.333
scaffold_496	44358	1	254.333
scaffold_496	95169	1	254.333
scaffold_73	35650	1	256.39
scaffold_73	35981	1	256.39
scaffold_73	99788	1	256.39
scaffold_73	123431	1	256.39
scaffold_73	123439	1	256.39
scaffold_73	123440	1	256.39
scaffold_73	123446	1	256.39
scaffold_73	218173	1	256.39
scaffold_73	218201	1	256.39
scaffold_73	134884	1	256.39
scaffold_252	112273	1	258.446
scaffold_252	157098	1	258.446
scaffold_252	177259	1	258.446
scaffold_252	177260	1	258.446
scaffold_73	225640	1	258.446
scaffold_252	209399	1	258.446
scaffold_252	209402	1	258.446
scaffold_72	269392	1	262.051
scaffold_72	70081	1	264.495
scaffold_72	96389	1	264.495
scaffold_72	238124	1	264.495
scaffold_72	253134	1	264.495
scaffold_58	61214	1	264.495
scaffold_58	170733	1	264.495
scaffold_58	198206	1	264.495
scaffold_58	418180	1	267.091
scaffold_632	72335	1	267.091
scaffold_91	100860	1	267.091
scaffold_91	100872	1	267.091
scaffold_91	398191	1	267.091
scaffold_58	211428	1	267.091
scaffold_593	32004	1	272.844
scaffold_102	304562	1	275.567
scaffold_102	303556	1	275.567
scaffold_102	250149	1	277.851
scaffold_267	191701	1	282.577
scaffold_267	191702	1	282.577
scaffold_267	199670	1	282.577
scaffold_267	142482	1	282.577
scaffold_102	48375	1	282.577
scaffold_102	72356	1	282.577
scaffold_102	72378	1	282.577
scaffold_18	587343	1	282.577
scaffold_267	73181	1	282.577
scaffold_267	73201	1	282.577
scaffold_18	79432	1	287.315
scaffold_18	312332	1	287.315
scaffold_18	151284	1	287.315
scaffold_18	151293	1	287.315
scaffold_18	398604	1	287.315
scaffold_63	305834	1	292.323
scaffold_63	305888	1	292.323
scaffold_114	286387	1	292.323
scaffold_114	331010	1	292.323
scaffold_114	331040	1	292.323
scaffold_63	255668	1	292.323
scaffold_63	293449	1	292.323
scaffold_63	293508	1	292.323
scaffold_63	293514	1	292.323
scaffold_63	321704	1	292.323
scaffold_63	344712	1	292.323
scaffold_63	430894	1	292.323
scaffold_63	255737	1	292.323
scaffold_143	27819	1	301.784
scaffold_143	45997	1	301.784
scaffold_143	50106	1	301.784
scaffold_143	58448	1	301.784
scaffold_143	116285	1	301.784
scaffold_143	178743	1	301.784
scaffold_195	139167	1	301.784
scaffold_143	198777	1	303.892
scaffold_143	259251	1	303.892
scaffold_143	259321	1	303.892
scaffold_195	209780	1	305.468
scaffold_163	243053	1	307.237
scaffold_664	2452	1	307.237
scaffold_163	211721	1	307.237
scaffold_163	312295	1	307.237
scaffold_664	53108	1	307.237
scaffold_380	199262	1	307.237
scaffold_163	91243	1	309.852
scaffold_163	35807	1	309.852
scaffold_163	135998	1	309.852
scaffold_163	156696	1	309.852
scaffold_111	240153	1	309.852
scaffold_111	240154	1	309.852
scaffold_34	123109	2	0
scaffold_34	126802	2	0
scaffold_34	185110	2	0
scaffold_47	121253	2	0
scaffold_47	121255	2	0
scaffold_47	121257	2	0
scaffold_47	121259	2	0
scaffold_47	370292	2	0
scaffold_47	482123	2	0
scaffold_47	505828	2	0
scaffold_188	63747	2	6.47494
scaffold_188	97219	2	6.47494
scaffold_188	137573	2	6.47494
scaffold_188	137593	2	6.47494
scaffold_188	137597	2	6.47494
scaffold_188	233745	2	6.47494
scaffold_188	233747	2	6.47494
scaffold_188	266543	2	6.47494
scaffold_188	278798	2	6.47494
scaffold_45	292919	2	15.0593
scaffold_45	292939	2	15.0593
scaffold_45	486306	2	15.0593
scaffold_178	76499	2	18.8118
scaffold_405	122144	2	18.8118
scaffold_321	148836	2	20.3107
scaffold_120	138758	2	25.8941
scaffold_120	179531	2	25.8941
scaffold_120	234336	2	25.8941
scaffold_120	237773	2	25.8941
scaffold_120	318473	2	25.8941
scaffold_573	118713	2	33.4788
scaffold_573	118633	2	33.4788
scaffold_230	112709	2	33.4788
scaffold_230	112716	2	33.4788
scaffold_230	35524	2	33.4788
scaffold_230	95204	2	33.4788
scaffold_230	96427	2	33.4788
scaffold_230	96432	2	33.4788
scaffold_230	174318	2	33.4788
scaffold_480	84878	2	33.4788
scaffold_480	84911	2	33.4788
scaffold_595	25344	2	33.4788
scaffold_595	50845	2	33.4788
scaffold_595	102684	2	33.4788
scaffold_595	102689	2	33.4788
scaffold_595	102741	2	33.4788
scaffold_230	59544	2	33.4788
scaffold_595	25280	2	33.4788
scaffold_595	61956	2	33.4788
scaffold_630	57214	2	38.4484
scaffold_573	8672	2	38.4484
scaffold_1020	31338	2	40.2655
scaffold_1020	31354	2	40.2655
scaffold_537	111233	2	41.7407
scaffold_537	121538	2	41.7407
scaffold_537	107826	2	41.7407
scaffold_622	81961	2	44.5256
scaffold_622	82004	2	44.5256
scaffold_622	82005	2	44.5256
scaffold_645	41020	2	47.5247
scaffold_645	49877	2	47.5247
scaffold_645	40203	2	47.5247
scaffold_1000	3410	2	49.9333
scaffold_1703	16343	2	49.9333
scaffold_1703	16361	2	49.9333
scaffold_1703	16369	2	49.9333
scaffold_465	43735	2	49.9333
scaffold_584	126689	2	49.9333
scaffold_719	13835	2	49.9333
scaffold_871	11157	2	49.9333
scaffold_698	2981	2	49.9333
scaffold_719	43633	2	49.9333
scaffold_773	29771	2	49.9333
scaffold_1093	3077	2	52.1208
scaffold_773	69402	2	52.1208
scaffold_889	33666	2	53.491
scaffold_101	269828	2	56.0049
scaffold_610	13887	2	56.0049
scaffold_610	13899	2	56.0049
scaffold_610	13937	2	56.0049
scaffold_610	13951	2	56.0049
scaffold_972	40266	2	56.0049
scaffold_1354	8850	2	56.0049
scaffold_1977	8215	2	56.0049
scaffold_101	320623	2	56.0049
scaffold_101	349491	2	56.0049
scaffold_610	13947	2	56.0049
scaffold_101	323514	2	56.0049
scaffold_1519	21396	2	56.0049
scaffold_829	27729	2	58.1464
scaffold_829	27759	2	58.1464
scaffold_1050	18050	2	58.1464
scaffold_865	37737	2	58.1464
scaffold_1050	40049	2	58.1464
scaffold_972	20172	2	58.1464
scaffold_829	57330	2	58.1464
scaffold_1340	41189	2	60.8889
scaffold_1340	41222	2	60.8889
scaffold_430	87931	2	62.2776
scaffold_430	87946	2	62.2776
scaffold_430	87952	2	62.2776
scaffold_430	172923	2	62.2776
scaffold_303	94447	2	65.0387
scaffold_303	107483	2	65.0387
scaffold_231	135127	2	66.4089
scaffold_231	185585	2	66.4089
scaffold_245	41332	2	66.4089
scaffold_245	41349	2	66.4089
scaffold_245	199304	2	66.4089
scaffold_245	199345	2	66.4089
scaffold_245	199349	2	66.4089
scaffold_303	181007	2	66.4089
scaffold_303	220055	2	66.4089
scaffold_422	173604	2	66.4089
scaffold_24	392865	2	69.1514
scaffold_24	392903	2	69.1514
scaffold_24	398877	2	69.1514
scaffold_24	398886	2	69.1514
scaffold_24	398890	2	69.1514
scaffold_24	398918	2	69.1514
scaffold_24	398930	2	69.1514
scaffold_24	392871	2	69.1514
scaffold_24	398929	2	69.1514
scaffold_24	170316	2	73.3035
scaffold_24	107048	2	73.3035
scaffold_327	163261	2	73.3035
scaffold_138	277140	2	76.0792
scaffold_138	154010	2	77.4494
scaffold_138	154033	2	77.4494
scaffold_254	174870	2	77.4494
scaffold_138	6817	2	77.4494
scaffold_138	146629	2	77.4494
scaffold_254	141586	2	77.4494
scaffold_254	141596	2	77.4494
scaffold_254	141626	2	77.4494
scaffold_254	170656	2	77.4494
scaffold_254	170682	2	77.4494
scaffold_254	175363	2	77.4494
scaffold_445	54630	2	77.4494
scaffold_445	79003	2	78.8196
scaffold_84	249099	2	78.8196
scaffold_254	25260	2	78.8196
scaffold_254	25316	2	78.8196
scaffold_445	45371	2	78.8196
scaffold_84	257978	2	78.8196
scaffold_84	138728	2	82.9387
scaffold_493	112069	2	88.4404
scaffold_493	112090	2	88.4404
scaffold_60	34282	2	88.4404
scaffold_60	456173	2	88.4404
scaffold_84	31257	2	88.4404
scaffold_10	144477	2	89.8106
scaffold_10	325942	2	89.8106
scaffold_10	349409	2	89.8106
scaffold_16	86319	2	89.8106
scaffold_16	92215	2	89.8106
scaffold_16	179700	2	89.8106
scaffold_16	491696	2	89.8106
scaffold_16	492183	2	89.8106
scaffold_172	66807	2	89.8106
scaffold_39	241690	2	91.2802
scaffold_39	241742	2	91.2802
scaffold_157	150498	2	91.2802
scaffold_157	265646	2	91.2802
scaffold_157	265647	2	91.2802
scaffold_157	265655	2	91.2802
scaffold_191	132425	2	91.2802
scaffold_191	132446	2	91.2802
scaffold_39	81257	2	91.2802
scaffold_39	81258	2	91.2802
scaffold_39	81262	2	91.2802
scaffold_39	81263	2	91.2802
scaffold_39	230997	2	91.2802
scaffold_39	240385	2	91.2802
scaffold_182	106408	2	95.3567
scaffold_182	148141	2	95.3567
scaffold_191	4696	2	95.3567
scaffold_39	50365	2	95.3567
scaffold_191	132385	2	95.3567
scaffold_172	105937	2	100.566
scaffold_60	336788	2	100.566
scaffold_10	624985	2	101.936
scaffold_172	66755	2	101.936
scaffold_309	159803	2	108.625
scaffold_507	142471	2	108.625
scaffold_309	35981	2	110.195
scaffold_309	60613	2	110.195
scaffold_309	116029	2	110.195
scaffold_309	159809	2	110.195
scaffold_309	185374	2	110.195
scaffold_309	203210	2	110.195
scaffold_309	203211	2	110.195
scaffold_564	105500	2	110.195
scaffold_564	105568	2	110.195
scaffold_408	159617	2	115.925
scaffold_628	22292	2	115.925
scaffold_846	52640	2	115.925
scaffold_497	16562	2	117.684
scaffold_292	141949	2	119.668
scaffold_692	67178	2	119.668
scaffold_2101	3269	2	119.668
scaffold_305	173166	2	123.041
scaffold_305	173199	2	123.041
scaffold_375	201936	2	123.041
scaffold_305	161994	2	123.041
scaffold_305	162035	2	123.041
scaffold_270	163014	2	124.912
scaffold_375	12746	2	124.912
scaffold_270	213697	2	124.912
scaffold_292	229389	2	128.516
scaffold_292	182001	2	128.516
scaffold_629	16115	2	128.516
scaffold_629	80393	2	128.516
scaffold_957	30682	2	128.516
scaffold_1182	23880	2	136.837
scaffold_1473	15781	2	136.837
scaffold_276	222591	2	136.837
scaffold_807	60959	2	136.837
scaffold_807	60974	2	136.837
scaffold_437	156411	2	138.26
scaffold_292	69206	2	139.834
scaffold_292	69222	2	139.834
scaffold_292	69223	2	139.834
scaffold_437	117335	2	139.834
scaffold_437	117347	2	139.834
scaffold_437	117367	2	139.834
scaffold_292	181959	2	141.412
scaffold_292	182267	2	141.412
scaffold_472	83945	2	141.412
scaffold_472	83981	2	141.412
scaffold_629	15789	2	141.412
scaffold_629	16089	2	141.412
scaffold_629	16096	2	141.412
scaffold_629	80369	2	141.412
scaffold_945	3361	2	141.412
scaffold_957	14541	2	141.412
scaffold_266	22856	2	142.839
scaffold_305	173157	2	142.839
scaffold_375	156259	2	142.839
scaffold_375	156276	2	142.839
scaffold_375	201893	2	142.839
scaffold_166	261785	2	147.025
scaffold_166	261805	2	147.025
scaffold_468	135560	2	149.925
scaffold_991	54856	2	149.925
scaffold_1624	12573	2	153.539
scaffold_1624	12585	2	153.539
scaffold_1624	17771	2	153.539
scaffold_468	5462	2	156.721
scaffold_880	8885	2	156.721
scaffold_880	8898	2	156.721
scaffold_880	15675	2	156.721
scaffold_1807	10494	2	158.864
scaffold_1010	22543	2	158.864
scaffold_1172	26539	2	158.864
scaffold_589	20664	2	160.639
scaffold_589	31042	2	160.639
scaffold_589	109272	2	160.639
scaffold_589	109255	2	160.639
scaffold_1871	11194	2	160.639
scaffold_1871	11204	2	160.639
scaffold_491	48117	2	162.013
scaffold_491	48126	2	162.013
scaffold_491	61155	2	162.013
scaffold_1314	8271	2	166.605
scaffold_1314	8273	2	166.605
scaffold_1314	9373	2	166.605
scaffold_1314	9380	2	166.605
scaffold_1314	9456	2	166.605
scaffold_265	144652	2	166.605
scaffold_265	144667	2	166.605
scaffold_571	21912	2	169.989
scaffold_82	43983	2	169.989
scaffold_82	44016	2	169.989
scaffold_82	104439	2	169.989
scaffold_82	108903	2	169.989
scaffold_82	108914	2	169.989
scaffold_82	296433	2	169.989
scaffold_571	9224	2	169.989
scaffold_82	154309	2	169.989
scaffold_82	154357	2	169.989
scaffold_304	57382	2	173.417
scaffold_304	57445	2	173.417
scaffold_304	71194	2	173.417
scaffold_304	71195	2	173.417
scaffold_304	136527	2	173.417
scaffold_105	63294	2	175.892
scaffold_105	63342	2	175.892
scaffold_105	63351	2	175.892
scaffold_105	132057	2	175.892
scaffold_105	252410	2	175.892
scaffold_105	288266	2	175.892
scaffold_105	57428	2	175.892
scaffold_105	57435	2	175.892
scaffold_859	39652	2	175.892
scaffold_105	367493	2	178.535
scaffold_105	367498	2	178.535
scaffold_105	367517	2	178.535
scaffold_218	38328	2	178.535
scaffold_239	191369	2	178.535
scaffold_239	191371	2	178.535
scaffold_268	64374	2	178.535
scaffold_456	142767	2	178.535
scaffold_797	67148	2	178.535
scaffold_218	38290	2	178.535
scaffold_218	38356	2	178.535
scaffold_218	65420	2	178.535
scaffold_268	69114	2	178.535
scaffold_268	69117	2	178.535
scaffold_268	182752	2	178.535
scaffold_268	182757	2	178.535
scaffold_797	58926	2	178.535
scaffold_239	115156	2	181.027
scaffold_239	115183	2	181.027
scaffold_83	58792	2	183.328
scaffold_239	31921	2	183.328
scaffold_83	205676	2	185.622
scaffold_83	303393	2	188.254
scaffold_83	355355	2	188.254
scaffold_83	377886	2	191.336
scaffold_19	430637	2	196.079
scaffold_19	430679	2	196.079
scaffold_19	444507	2	196.079
scaffold_19	444535	2	196.079
scaffold_19	496428	2	198.103
scaffold_443	108259	2	198.103
scaffold_443	108261	2	198.103
scaffold_557	117926	2	201.37
scaffold_804	24342	2	201.37
scaffold_804	24371	2	201.37
scaffold_804	32495	2	201.37
scaffold_461	106830	2	202.997
scaffold_599	101143	2	202.997
scaffold_615	20784	2	202.997
scaffold_615	20805	2	202.997
scaffold_615	20820	2	202.997
scaffold_615	20827	2	202.997
scaffold_615	20851	2	202.997
scaffold_615	20853	2	202.997
scaffold_461	55533	2	202.997
scaffold_461	55534	2	202.997
scaffold_275	186394	2	206.203
scaffold_275	184357	2	206.203
scaffold_275	251470	2	206.203
scaffold_533	101586	2	206.203
scaffold_615	47508	2	206.203
scaffold_615	47523	2	206.203
scaffold_615	100375	2	206.203
scaffold_533	105314	2	206.203
scaffold_533	105319	2	206.203
scaffold_533	105332	2	206.203
scaffold_533	105338	2	206.203
scaffold_93	177734	2	206.203
scaffold_385	89326	2	206.203
scaffold_533	47955	2	206.203
scaffold_93	366537	2	213.041
scaffold_235	172066	2	214.967
scaffold_235	172087	2	214.967
scaffold_235	243197	2	214.967
scaffold_235	243203	2	214.967
scaffold_235	243204	2	214.967
scaffold_460	9655	2	214.967
scaffold_460	125903	2	214.967
scaffold_968	46127	2	214.967
scaffold_23	442516	2	216.893
scaffold_23	569481	2	216.893
scaffold_23	442565	2	216.893
scaffold_23	458161	2	216.893
scaffold_23	563288	2	216.893
scaffold_23	270589	2	216.893
scaffold_17	82438	2	218.304
scaffold_17	267081	2	218.304
scaffold_17	131381	2	218.304
scaffold_17	293163	2	218.304
scaffold_23	28640	2	218.304
scaffold_17	164735	2	218.304
scaffold_17	293222	2	218.304
scaffold_17	361557	2	218.304
scaffold_17	361633	2	218.304
scaffold_23	115344	2	218.304
scaffold_23	126004	2	218.304
scaffold_23	126013	2	218.304
scaffold_174	308033	2	220.348
scaffold_174	257571	2	220.348
scaffold_174	257576	2	220.348
scaffold_174	309329	2	220.348
scaffold_174	309348	2	220.348
scaffold_79	141476	2	223.234
scaffold_174	61143	2	223.234
scaffold_79	59445	2	223.234
scaffold_79	118340	2	223.234
scaffold_79	208841	2	223.234
scaffold_79	216332	2	223.234
scaffold_3	595376	2	227.306
scaffold_3	713745	2	227.306
scaffold_3	642854	2	227.306
scaffold_3	632600	2	227.306
scaffold_3	632624	2	227.306
scaffold_3	791258	2	227.306
scaffold_3	583515	2	227.306
scaffold_3	777648	2	227.306
scaffold_330	195845	2	227.306
scaffold_3	207361	2	232.69
scaffold_3	207375	2	232.69
scaffold_79	306590	2	232.69
scaffold_79	405021	2	232.69
scaffold_3	525725	2	234.072
scaffold_3	658638	2	234.072
scaffold_538	95125	2	240.55
scaffold_1635	4422	2	240.55
scaffold_1635	4437	2	240.55
scaffold_1635	4497	2	240.55
scaffold_769	55401	2	245.731
scaffold_787	71553	2	245.731
scaffold_1077	14630	2	249.992
scaffold_1077	17176	2	249.992
scaffold_1077	17191	2	249.992
scaffold_1077	30713	2	249.992
scaffold_538	50240	2	249.992
scaffold_1152	23238	2	252.824
scaffold_1380	1446	2	257.221
scaffold_338	97624	2	261.698
scaffold_125	349857	2	267.483
scaffold_125	11318	2	271.659
scaffold_125	28766	2	271.659
scaffold_125	11355	2	273.098
scaffold_125	11386	2	273.098
scaffold_295	83661	2	274.642
scaffold_295	25316	2	274.642
scaffold_295	122639	2	274.642
scaffold_431	168007	2	274.642
scaffold_295	25239	2	276.127
scaffold_431	148775	2	276.127
scaffold_788	50508	2	280.212
scaffold_1161	13548	2	280.212
scaffold_1233	7840	2	283.668
scaffold_788	69289	2	283.668
scaffold_788	69290	2	283.668
scaffold_788	69311	2	283.668
scaffold_788	70575	2	283.668
scaffold_788	70597	2	283.668
scaffold_170	30626	2	285.273
scaffold_548	49463	2	286.765
scaffold_170	280910	2	289.748
scaffold_170	257786	2	289.748
scaffold_170	280948	2	292.54
scaffold_36	67812	2	295.174
scaffold_36	200405	2	298.093
scaffold_36	203965	2	298.093
scaffold_36	207991	2	298.093
scaffold_36	262081	2	298.093
scaffold_36	316570	2	298.093
scaffold_36	317757	2	298.093
scaffold_36	374419	2	298.093
scaffold_36	374477	2	298.093
scaffold_36	386335	2	298.093
scaffold_36	386353	2	298.093
scaffold_36	208058	2	301.097
scaffold_36	316580	2	301.097
scaffold_36	186773	2	301.097
scaffold_156	106035	2	304.049
scaffold_156	216510	2	304.049
scaffold_1017	12651	3	0
scaffold_567	10675	3	0
scaffold_1579	19507	3	0
scaffold_1216	17453	3	2.46868
scaffold_1216	17474	3	2.46868
scaffold_601	53538	3	4.13458
scaffold_1250	11320	3	7.12689
scaffold_518	66895	3	7.12689
scaffold_601	7276	3	7.12689
scaffold_601	7330	3	7.12689
scaffold_601	92945	3	7.12689
scaffold_653	75655	3	7.12689
scaffold_223	23610	3	8.82071
scaffold_223	56484	3	8.82071
scaffold_223	62376	3	8.82071
scaffold_844	6767	3	12.0067
scaffold_1017	3124	3	14.5342
scaffold_1017	12630	3	14.5342
scaffold_1858	12066	3	14.5342
scaffold_875	23631	3	14.5342
scaffold_96	294917	3	18.653
scaffold_96	350921	3	22.6133
scaffold_96	362499	3	22.6133
scaffold_1031	30645	3	34.7973
scaffold_689	80939	3	34.7973
scaffold_689	77976	3	34.7973
scaffold_689	97808	3	34.7973
scaffold_1362	13136	3	39.415
scaffold_1051	45684	3	39.415
scaffold_583	44308	3	43.2533
scaffold_583	63419	3	43.2533
scaffold_1464	4561	3	50.3469
scaffold_1464	4564	3	50.3469
scaffold_1464	4517	3	50.3469
scaffold_989	9481	3	50.3469
scaffold_1464	12810	3	50.3469
scaffold_1321	21825	3	50.3469
scaffold_989	13550	3	50.3469
scaffold_799	15788	3	50.3469
scaffold_534	9616	3	50.3469
scaffold_534	87426	3	50.3469
scaffold_534	154687	3	50.3469
scaffold_534	17609	3	50.3469
scaffold_534	17635	3	50.3469
scaffold_534	17646	3	50.3469
scaffold_534	17649	3	50.3469
scaffold_583	91864	3	50.3469
scaffold_583	91879	3	50.3469
scaffold_878	49057	3	57.0229
scaffold_878	28355	3	57.0229
scaffold_878	28362	3	57.0229
scaffold_1489	3407	3	57.0229
scaffold_1489	3412	3	57.0229
scaffold_1227	3409	3	63.1011
scaffold_737	40417	3	63.1011
scaffold_737	76822	3	63.1011
scaffold_1270	15138	3	66.3126
scaffold_556	25760	3	66.3126
scaffold_939	46579	3	66.3126
scaffold_939	46582	3	66.3126
scaffold_762	15120	3	69.2509
scaffold_1067	42882	3	69.2509
scaffold_757	7386	3	69.2509
scaffold_757	41675	3	69.2509
scaffold_757	41677	3	69.2509
scaffold_757	41720	3	69.2509
scaffold_757	50853	3	69.2509
scaffold_2183	6106	3	74.2749
scaffold_418	49708	3	74.2749
scaffold_1308	20986	3	74.2749
scaffold_1308	20988	3	74.2749
scaffold_418	16666	3	74.2749
scaffold_899	54048	3	74.2749
scaffold_1985	1489	3	74.2749
scaffold_582	38191	3	74.2749
scaffold_582	79513	3	74.2749
scaffold_670	11046	3	74.2749
scaffold_582	51838	3	74.2749
scaffold_582	93854	3	74.2749
scaffold_670	11013	3	74.2749
scaffold_670	11014	3	74.2749
scaffold_623	106372	3	76.9072
scaffold_205	2447	3	79.6497
scaffold_205	21489	3	79.6497
scaffold_841	4630	3	79.6497
scaffold_205	296147	3	81.0199
scaffold_205	279741	3	81.0199
scaffold_69	399784	3	83.7623
scaffold_976	15354	3	83.7623
scaffold_137	21059	3	83.7623
scaffold_69	393233	3	83.7623
scaffold_137	21055	3	83.7623
scaffold_69	412418	3	83.7623
scaffold_69	39420	3	85.1925
scaffold_274	128642	3	86.6227
scaffold_87	62661	3	86.6227
scaffold_87	249253	3	86.6227
scaffold_153	83294	3	86.6227
scaffold_52	44882	3	86.6227
scaffold_87	23559	3	86.6227
scaffold_52	222138	3	89.3937
scaffold_52	201314	3	89.3937
scaffold_378	56936	3	91.5148
scaffold_378	114027	3	91.5148
scaffold_52	495510	3	91.5148
scaffold_52	56651	3	91.5148
scaffold_52	323904	3	91.5148
scaffold_52	342814	3	91.5148
scaffold_52	468234	3	91.5148
scaffold_298	8533	3	94.9581
scaffold_322	195905	3	96.8709
scaffold_127	171782	3	96.8709
scaffold_298	91241	3	96.8709
scaffold_322	104184	3	96.8709
scaffold_322	88523	3	96.8709
scaffold_12	13019	3	98.5293
scaffold_12	25781	3	98.5293
scaffold_12	365673	3	103.911
scaffold_232	42202	3	103.911
scaffold_232	250836	3	103.911
scaffold_232	274280	3	103.911
scaffold_12	505089	3	103.911
scaffold_12	569163	3	103.911
scaffold_232	93269	3	103.911
scaffold_1122	35907	3	105.44
scaffold_1122	35935	3	105.44
scaffold_789	16133	3	105.44
scaffold_824	53720	3	105.44
scaffold_824	53732	3	105.44
scaffold_906	30335	3	105.44
scaffold_168	101688	3	106.817
scaffold_349	158022	3	106.817
scaffold_395	117393	3	106.817
scaffold_395	117435	3	106.817
scaffold_349	95420	3	106.817
scaffold_395	44184	3	106.817
scaffold_808	22751	3	106.817
scaffold_340	8885	3	108.229
scaffold_340	112338	3	108.229
scaffold_349	48871	3	108.229
scaffold_349	49171	3	108.229
scaffold_349	49174	3	108.229
scaffold_349	49193	3	108.229
scaffold_175	33454	3	110.915
scaffold_175	270959	3	110.915
scaffold_175	297530	3	110.915
scaffold_217	134939	3	110.915
scaffold_227	40791	3	110.915
scaffold_227	40795	3	110.915
scaffold_227	40806	3	110.915
scaffold_227	40807	3	110.915
scaffold_227	40821	3	110.915
scaffold_227	40849	3	110.915
scaffold_440	55810	3	110.915
scaffold_440	55819	3	110.915
scaffold_663	14643	3	110.915
scaffold_663	82115	3	110.915
scaffold_663	82170	3	110.915
scaffold_663	82180	3	110.915
scaffold_175	270924	3	110.915
scaffold_175	270935	3	110.915
scaffold_175	304548	3	110.915
scaffold_550	19904	3	110.915
scaffold_663	39653	3	110.915
scaffold_227	203273	3	114.353
scaffold_227	196577	3	114.353
scaffold_31	528848	3	115.723
scaffold_487	57191	3	115.723
scaffold_31	528797	3	115.723
scaffold_31	340357	3	118.064
scaffold_31	372873	3	118.064
scaffold_31	372919	3	118.064
scaffold_31	389683	3	118.064
scaffold_121	273446	3	121.863
scaffold_31	293324	3	121.863
scaffold_31	87930	3	121.863
scaffold_31	87989	3	121.863
scaffold_31	111264	3	121.863
scaffold_121	279224	3	121.863
scaffold_121	279293	3	121.863
scaffold_121	320719	3	121.863
scaffold_31	120292	3	121.863
scaffold_31	212076	3	121.863
scaffold_31	212086	3	121.863
scaffold_31	212089	3	121.863
scaffold_31	212120	3	121.863
scaffold_31	212127	3	121.863
scaffold_31	81675	3	121.863
scaffold_31	81683	3	121.863
scaffold_31	182256	3	121.863
scaffold_6	490299	3	127.33
scaffold_6	490306	3	127.33
scaffold_6	558054	3	127.33
scaffold_6	182484	3	129.793
scaffold_6	264368	3	129.793
scaffold_6	264378	3	129.793
scaffold_6	411732	3	129.793
scaffold_6	416014	3	129.793
scaffold_748	20110	3	129.793
scaffold_748	20142	3	129.793
scaffold_748	36063	3	129.793
scaffold_68	419233	3	133.634
scaffold_1449	14642	3	133.634
scaffold_484	23897	3	133.634
scaffold_484	122484	3	133.634
scaffold_484	122509	3	133.634
scaffold_68	131598	3	133.634
scaffold_68	155722	3	133.634
scaffold_68	201762	3	133.634
scaffold_68	258378	3	133.634
scaffold_68	354292	3	133.634
scaffold_68	380078	3	133.634
scaffold_68	230461	3	133.634
scaffold_206	46503	3	138.073
scaffold_206	46511	3	138.073
scaffold_206	53967	3	138.073
scaffold_206	53994	3	138.073
scaffold_402	125670	3	138.073
scaffold_206	213204	3	144.317
scaffold_484	51867	3	145.687
scaffold_1149	36087	3	149.509
scaffold_311	66699	3	149.509
scaffold_311	74567	3	149.509
scaffold_311	153440	3	149.509
scaffold_311	176527	3	158.208
scaffold_311	7004	3	159.773
scaffold_311	7071	3	159.773
scaffold_311	66634	3	159.773
scaffold_604	76902	3	159.773
scaffold_551	120510	3	162.17
scaffold_403	177873	3	162.17
scaffold_691	55086	3	162.17
scaffold_691	86528	3	162.17
scaffold_828	14532	3	162.17
scaffold_828	14538	3	162.17
scaffold_828	14551	3	162.17
scaffold_828	29465	3	162.17
scaffold_828	47241	3	162.17
scaffold_908	43533	3	162.17
scaffold_908	43591	3	162.17
scaffold_828	63970	3	162.17
scaffold_607	35435	3	164.435
scaffold_828	67374	3	164.435
scaffold_1439	8083	3	167.263
scaffold_1439	8124	3	167.263
scaffold_1439	8125	3	167.263
scaffold_1439	8130	3	167.263
scaffold_498	110489	3	167.263
scaffold_310	83716	3	167.263
scaffold_310	83785	3	167.263
scaffold_798	75187	3	167.263
scaffold_798	75242	3	167.263
scaffold_1036	35394	3	168.72
scaffold_607	106892	3	168.72
scaffold_498	110526	3	168.72
scaffold_498	110543	3	168.72
scaffold_499	101024	3	171.501
scaffold_290	218507	3	172.965
scaffold_117	3796	3	175.799
scaffold_290	44093	3	175.799
scaffold_290	44643	3	175.799
scaffold_117	205839	3	177.217
scaffold_144	17375	3	178.6
scaffold_154	85099	3	178.6
scaffold_154	85154	3	178.6
scaffold_154	85171	3	178.6
scaffold_154	220542	3	178.6
scaffold_154	226045	3	178.6
scaffold_154	266117	3	178.6
scaffold_320	128119	3	180.162
scaffold_320	187487	3	180.162
scaffold_524	119255	3	182.008
scaffold_524	119263	3	182.008
scaffold_320	92523	3	182.008
scaffold_524	95195	3	182.008
scaffold_148	72376	3	183.978
scaffold_148	72378	3	183.978
scaffold_148	102178	3	183.978
scaffold_494	1211	3	183.978
scaffold_494	38370	3	183.978
scaffold_494	78612	3	183.978
scaffold_494	107720	3	183.978
scaffold_494	108654	3	183.978
scaffold_494	108687	3	183.978
scaffold_1424	7762	3	185.993
scaffold_1424	7805	3	185.993
scaffold_1952	13755	3	185.993
scaffold_792	26757	3	185.993
scaffold_792	26779	3	185.993
scaffold_792	26780	3	185.993
scaffold_1952	12135	3	185.993
scaffold_914	26510	3	188.013
scaffold_155	73565	3	190.036
scaffold_155	73608	3	190.036
scaffold_155	267064	3	190.036
scaffold_446	78988	3	190.036
scaffold_446	157381	3	190.036
scaffold_155	276227	3	190.036
scaffold_1225	16966	3	198.281
scaffold_1225	16973	3	198.281
scaffold_1225	16974	3	198.281
scaffold_1225	17007	3	198.281
scaffold_1041	23340	3	200.969
scaffold_186	158418	3	200.969
scaffold_293	116893	3	200.969
scaffold_293	116897	3	200.969
scaffold_293	133845	3	200.969
scaffold_293	133854	3	200.969
scaffold_293	156430	3	200.969
scaffold_293	156452	3	200.969
scaffold_293	159900	3	200.969
scaffold_293	159906	3	200.969
scaffold_293	206089	3	200.969
scaffold_611	93841	3	200.969
scaffold_830	27208	3	200.969
scaffold_872	69644	3	200.969
scaffold_884	36992	3	200.969
scaffold_969	46930	3	200.969
scaffold_616	69122	3	200.969
scaffold_1460	12465	3	200.969
scaffold_171	195920	3	200.969
scaffold_293	134307	3	200.969
scaffold_293	165867	3	200.969
scaffold_293	165872	3	200.969
scaffold_293	165910	3	200.969
scaffold_1384	28632	3	203.566
scaffold_171	54406	3	203.566
scaffold_171	68593	3	203.566
scaffold_171	70494	3	203.566
scaffold_171	105345	3	203.566
scaffold_171	107258	3	203.566
scaffold_171	107273	3	203.566
scaffold_171	291680	3	203.566
scaffold_9	68395	3	203.566
scaffold_9	198623	3	203.566
scaffold_9	198641	3	203.566
scaffold_9	205700	3	203.566
scaffold_9	205764	3	203.566
scaffold_9	205768	3	203.566
scaffold_9	242964	3	203.566
scaffold_9	243042	3	203.566
scaffold_9	276749	3	203.566
scaffold_9	293709	3	203.566
scaffold_9	293736	3	203.566
scaffold_9	315033	3	203.566
scaffold_9	390954	3	203.566
scaffold_9	390960	3	203.566
scaffold_9	414021	3	203.566
scaffold_9	433677	3	203.566
scaffold_9	539903	3	203.566
scaffold_9	559911	3	203.566
scaffold_9	662835	3	203.566
scaffold_9	662864	3	203.566
scaffold_1054	22333	3	203.566
scaffold_171	107274	3	203.566
scaffold_171	107294	3	203.566
scaffold_171	109591	3	203.566
scaffold_207	8062	3	203.566
scaffold_207	42395	3	203.566
scaffold_1176	22337	3	207.394
scaffold_1526	9106	3	207.394
scaffold_1526	9149	3	207.394
scaffold_328	154574	3	207.394
scaffold_328	154643	3	207.394
scaffold_328	182931	3	207.394
scaffold_559	78911	3	207.394
scaffold_559	81063	3	207.394
scaffold_559	81102	3	207.394
scaffold_559	132228	3	207.394
scaffold_1176	22365	3	207.394
scaffold_2192	5336	3	207.394
scaffold_328	218531	3	207.394
scaffold_328	218546	3	207.394
scaffold_328	218557	3	207.394
scaffold_559	82025	3	207.394
scaffold_9	145566	3	207.394
scaffold_1526	9606	3	207.394
scaffold_1526	9607	3	207.394
scaffold_427	62317	3	207.394
scaffold_427	62385	3	207.394
scaffold_427	67676	3	213.211
scaffold_427	115538	3	213.211
scaffold_427	81331	3	213.211
scaffold_427	81397	3	213.211
scaffold_331	166388	3	216.641
scaffold_328	67839	3	216.641
scaffold_331	68441	3	216.641
scaffold_739	68171	3	221.446
scaffold_739	68176	3	221.446
scaffold_998	39956	3	221.446
scaffold_998	39963	3	221.446
scaffold_678	26352	3	227.703
scaffold_672	18587	3	229.423
scaffold_672	18607	3	229.423
scaffold_672	18616	3	229.423
scaffold_1070	7624	3	229.423
scaffold_1070	7642	3	229.423
scaffold_715	35726	3	232.632
scaffold_715	35742	3	232.632
scaffold_1084	34359	3	234.275
scaffold_1084	34380	3	234.275
scaffold_14	595320	3	236.238
scaffold_14	621159	3	236.238
scaffold_715	83009	3	245.395
scaffold_715	87748	3	245.395
scaffold_14	342037	3	248.141
scaffold_14	493739	3	248.141
scaffold_14	241608	3	249.543
scaffold_14	274979	3	249.543
scaffold_14	248628	3	259.267
scaffold_14	74340	3	264.683
scaffold_401	33712	3	264.683
scaffold_401	83500	3	264.683
scaffold_401	83524	3	264.683
scaffold_441	20938	3	264.683
scaffold_441	96562	3	264.683
scaffold_14	126931	3	264.683
scaffold_370	8384	3	269.685
scaffold_370	21544	3	269.685
scaffold_370	88841	3	269.685
scaffold_370	140778	3	269.685
scaffold_370	140797	3	269.685
scaffold_370	140816	3	269.685
scaffold_370	161857	3	269.685
scaffold_370	161916	3	269.685
scaffold_732	80193	3	269.685
scaffold_1247	13986	3	272.945
scaffold_131	64514	3	272.945
scaffold_131	64528	3	272.945
scaffold_131	64549	3	272.945
scaffold_131	73465	3	272.945
scaffold_131	75365	3	272.945
scaffold_131	102696	3	272.945
scaffold_131	176024	3	272.945
scaffold_1572	6590	3	272.945
scaffold_1572	6601	3	272.945
scaffold_1572	6607	3	272.945
scaffold_1572	6615	3	272.945
scaffold_419	147092	3	272.945
scaffold_970	15237	3	272.945
scaffold_1004	50942	3	275.309
scaffold_1004	50970	3	275.309
scaffold_1004	50993	3	275.309
scaffold_970	40865	3	275.309
scaffold_834	48793	3	279.495
scaffold_834	48816	3	279.495
scaffold_834	49246	3	279.495
scaffold_834	49286	3	279.495
scaffold_1674	8184	3	283.682
scaffold_474	28674	3	283.682
scaffold_474	39494	3	283.682
scaffold_474	48422	3	283.682
scaffold_474	48425	3	283.682
scaffold_474	48428	3	283.682
scaffold_474	126039	3	283.682
scaffold_503	1860	3	283.682
scaffold_541	4847	3	283.682
scaffold_580	50396	3	283.682
scaffold_592	92187	3	283.682
scaffold_319	59207	3	283.682
scaffold_319	164465	3	283.682
scaffold_112	51792	4	0
scaffold_202	145893	4	0
scaffold_202	235386	4	0
scaffold_425	151920	4	0
scaffold_605	13428	4	4.54199
scaffold_605	13430	4	4.54199
scaffold_112	354179	4	10.3108
scaffold_264	209188	4	10.3108
scaffold_202	255091	4	13.1343
scaffold_459	22644	4	17.3425
scaffold_459	131849	4	17.3425
scaffold_482	30183	4	17.3425
scaffold_617	47585	4	18.74
scaffold_617	81393	4	18.74
scaffold_2018	5820	4	23.2656
scaffold_617	81247	4	23.2656
scaffold_617	116394	4	23.2656
scaffold_482	134206	4	25.3033
scaffold_261	86352	4	25.3033
scaffold_261	86377	4	25.3033
scaffold_482	33402	4	25.3033
scaffold_482	37122	4	25.3033
scaffold_261	160484	4	25.3033
scaffold_261	161800	4	25.3033
scaffold_1106	32546	4	31.4133
scaffold_838	9984	4	33.5759
scaffold_506	5193	4	35.7133
scaffold_2222	16224	4	43.3777
scaffold_1011	20604	4	43.3777
scaffold_1011	33677	4	43.3777
scaffold_759	46329	4	45.5056
scaffold_527	130238	4	50.4689
scaffold_527	88489	4	50.4689
scaffold_429	169365	4	54.8663
scaffold_701	5209	4	54.8663
scaffold_701	54577	4	54.8663
scaffold_701	54580	4	54.8663
scaffold_701	54589	4	54.8663
scaffold_701	56170	4	54.8663
scaffold_701	57001	4	54.8663
scaffold_701	56999	4	54.8663
scaffold_2036	8082	4	62.1325
scaffold_2036	8084	4	62.1325
scaffold_2036	8111	4	62.1325
scaffold_772	51622	4	62.1325
scaffold_1381	23137	4	62.1325
scaffold_772	46585	4	62.1325
scaffold_753	7807	4	64.1885
scaffold_744	55143	4	64.1885
scaffold_744	36764	4	67.0906
scaffold_1125	32944	4	70.6261
scaffold_1125	32962	4	70.6261
scaffold_1440	2079	4	74.0574
scaffold_1462	24397	4	76.7434
scaffold_761	70767	4	86.3752
scaffold_761	70769	4	86.3752
scaffold_761	70782	4	86.3752
scaffold_761	70800	4	86.3752
scaffold_761	70804	4	86.3752
scaffold_1273	11029	4	88.3657
scaffold_1273	11059	4	88.3657
scaffold_1953	9951	4	88.3657
scaffold_733	15536	4	90.3908
scaffold_733	15575	4	90.3908
scaffold_1405	9111	4	90.3908
scaffold_911	50549	4	90.3908
scaffold_911	50552	4	90.3908
scaffold_495	12131	4	93.7768
scaffold_495	71792	4	93.7768
scaffold_495	71823	4	93.7768
scaffold_416	90414	4	97.334
scaffold_504	105702	4	97.334
scaffold_416	68363	4	97.334
scaffold_1078	5788	4	97.334
scaffold_1078	5864	4	97.334
scaffold_1313	9813	4	97.334
scaffold_1571	3367	4	97.334
scaffold_1980	9739	4	97.334
scaffold_1980	9744	4	97.334
scaffold_665	57771	4	97.334
scaffold_665	70953	4	97.334
scaffold_665	70960	4	97.334
scaffold_895	3456	4	97.334
scaffold_992	25451	4	101.239
scaffold_992	25480	4	101.239
scaffold_1966	5381	4	101.239
scaffold_317	139067	4	101.239
scaffold_910	14645	4	101.239
scaffold_390	41912	4	101.239
scaffold_390	143816	4	101.239
scaffold_721	74145	4	101.239
scaffold_981	20024	4	101.239
scaffold_371	39690	4	101.239
scaffold_333	197253	4	106.587
scaffold_355	77724	4	106.587
scaffold_634	11269	4	106.587
scaffold_371	22902	4	114.714
scaffold_827	68215	4	114.714
scaffold_910	16049	4	114.714
scaffold_981	28334	4	114.714
scaffold_1558	4098	4	117.749
scaffold_504	149471	4	117.749
scaffold_665	3742	4	117.749
scaffold_665	3783	4	117.749
scaffold_971	29388	4	117.749
scaffold_665	28402	4	117.749
scaffold_665	28421	4	117.749
scaffold_269	50552	4	121
scaffold_416	151359	4	121
scaffold_25	571367	4	124.134
scaffold_528	58448	4	124.134
scaffold_528	58457	4	124.134
scaffold_528	58479	4	124.134
scaffold_25	476027	4	125.895
scaffold_25	457967	4	130.577
scaffold_25	476031	4	135.632
scaffold_25	169386	4	141.214
scaffold_66	395594	4	142.584
scaffold_66	395595	4	142.584
scaffold_66	290007	4	143.966
scaffold_66	249703	4	143.966
scaffold_66	295458	4	143.966
scaffold_66	345235	4	143.966
scaffold_66	345236	4	143.966
scaffold_66	345275	4	143.966
scaffold_66	245376	4	145.354
scaffold_66	245642	4	145.354
scaffold_66	84204	4	146.765
scaffold_66	84254	4	146.765
scaffold_956	32815	4	148.171
scaffold_185	67641	4	149.541
scaffold_185	186185	4	149.541
scaffold_185	44363	4	150.911
scaffold_98	272010	4	156.413
scaffold_98	272118	4	156.413
scaffold_57	293354	4	157.783
scaffold_98	360887	4	157.783
scaffold_282	233954	4	159.32
scaffold_40	515222	4	159.32
scaffold_40	515229	4	159.32
scaffold_57	147456	4	159.32
scaffold_57	232022	4	159.32
scaffold_57	232041	4	159.32
scaffold_282	174171	4	159.32
scaffold_282	184395	4	159.32
scaffold_282	194554	4	159.32
scaffold_57	109896	4	159.32
scaffold_40	173717	4	163.614
scaffold_40	173723	4	163.614
scaffold_40	135120	4	163.614
scaffold_113	190495	4	166.523
scaffold_113	190534	4	166.523
scaffold_113	85613	4	166.523
scaffold_113	293088	4	166.523
scaffold_113	304210	4	166.523
scaffold_113	44127	4	166.523
scaffold_113	145032	4	166.523
scaffold_183	255698	4	166.523
scaffold_406	148801	4	170.053
scaffold_1356	409	4	174.25
scaffold_1780	7263	4	174.25
scaffold_770	37730	4	174.25
scaffold_242	210876	4	177.869
scaffold_242	25795	4	177.869
scaffold_242	25861	4	177.869
scaffold_646	94174	4	177.869
scaffold_242	25866	4	177.869
scaffold_242	97420	4	177.869
scaffold_42	450754	4	177.869
scaffold_42	450774	4	177.869
scaffold_699	62914	4	177.869
scaffold_242	165524	4	177.869
scaffold_242	165527	4	177.869
scaffold_42	71107	4	177.869
scaffold_42	280267	4	177.869
scaffold_42	438560	4	177.869
scaffold_89	120953	4	177.869
scaffold_959	23818	4	177.869
scaffold_136	328449	4	181.096
scaffold_369	14918	4	181.096
scaffold_369	9908	4	181.096
scaffold_142	60867	4	182.65
scaffold_142	137349	4	184.851
scaffold_119	214763	4	184.851
scaffold_119	289024	4	184.851
scaffold_119	322566	4	184.851
scaffold_142	219103	4	184.851
scaffold_142	343635	4	184.851
scaffold_142	343658	4	184.851
scaffold_142	343685	4	184.851
scaffold_142	346925	4	184.851
scaffold_119	315758	4	184.851
scaffold_142	219090	4	184.851
scaffold_136	227707	4	191.071
scaffold_136	81447	4	191.071
scaffold_136	189851	4	191.071
scaffold_136	212256	4	191.071
scaffold_136	228086	4	191.071
scaffold_136	173753	4	191.071
scaffold_136	189838	4	191.071
scaffold_136	189859	4	191.071
scaffold_953	51545	4	201.679
scaffold_953	51549	4	201.679
scaffold_953	51554	4	201.679
scaffold_953	51555	4	201.679
scaffold_1240	17802	4	201.679
scaffold_953	18932	4	201.679
scaffold_682	30377	4	203.295
scaffold_406	10308	4	203.295
scaffold_406	148782	4	204.665
scaffold_183	296378	4	206.039
scaffold_40	173645	4	208.786
scaffold_282	129753	4	212.906
scaffold_282	129805	4	212.906
scaffold_57	1751	4	212.906
scaffold_57	293345	4	214.276
scaffold_98	360854	4	214.276
scaffold_98	360855	4	214.276
scaffold_98	360892	4	214.276
scaffold_98	141812	4	215.646
scaffold_98	216916	4	215.646
scaffold_98	272028	4	215.646
scaffold_749	62366	4	219.765
scaffold_1356	12272	4	240.393
scaffold_784	11637	4	240.393
scaffold_569	117825	4	240.393
scaffold_1112	31405	4	242.518
scaffold_89	134071	4	243.967
scaffold_89	139418	4	243.967
scaffold_42	73506	4	243.967
scaffold_42	367973	4	243.967
scaffold_42	367999	4	243.967
scaffold_742	78896	4	243.967
scaffold_142	16466	4	248.165
scaffold_200	105493	4	253.398
scaffold_200	63846	4	255.041
scaffold_200	49063	4	255.041
scaffold_200	49085	4	255.041
scaffold_49	201790	4	256.776
scaffold_49	381416	4	259.884
scaffold_49	399446	4	259.884
scaffold_48	184131	4	263.554
scaffold_48	146061	4	263.554
scaffold_48	433575	4	263.554
scaffold_48	433586	4	263.554
scaffold_48	433588	4	263.554
scaffold_48	453025	4	263.554
scaffold_11	594733	4	274.665
scaffold_11	594758	4	274.665
scaffold_11	594792	4	274.665
scaffold_11	232350	4	274.665
scaffold_256	38384	4	274.665
scaffold_49	181999	4	274.665
scaffold_11	569285	4	274.665
scaffold_200	127941	4	278.154
scaffold_200	127958	4	278.154
scaffold_200	127990	4	278.154
scaffold_119	41810	4	281.383
scaffold_119	41874	4	281.383
scaffold_341	156911	4	284.559
scaffold_345	133069	4	284.559
scaffold_200	12368	4	284.559
scaffold_200	40792	4	284.559
scaffold_200	63832	4	284.559
scaffold_256	96939	4	284.559
scaffold_259	138157	4	284.559
scaffold_259	138175	4	284.559
scaffold_49	251539	4	290.822
scaffold_49	251544	4	290.822
scaffold_49	395531	4	290.822
scaffold_49	468729	4	292.451
scaffold_48	73672	4	293.821
scaffold_48	290968	4	293.821
scaffold_181	44978	4	296.602
scaffold_181	25325	4	296.602
scaffold_181	95624	4	296.602
scaffold_181	158821	4	296.602
scaffold_181	48213	4	296.602
scaffold_50	185253	4	299.4
scaffold_50	110812	4	299.4
scaffold_35	34495	4	300.788
scaffold_35	253794	4	300.788
scaffold_35	367324	4	300.788
scaffold_35	367360	4	304.906
scaffold_35	373479	4	304.906
scaffold_35	521477	4	306.31
scaffold_181	25394	4	306.31
scaffold_181	146836	4	306.31
scaffold_181	160912	4	306.31
scaffold_35	482364	4	306.31
scaffold_181	50014	4	306.31
scaffold_351	42125	4	306.31
scaffold_50	306646	4	310.498
scaffold_123	9096	4	313.33
scaffold_123	119921	4	313.33
scaffold_273	20148	4	313.33
scaffold_273	20162	4	313.33
scaffold_273	20181	4	313.33
scaffold_273	20187	4	313.33
scaffold_213	215401	4	315.803
scaffold_213	215450	4	315.803
scaffold_640	40143	4	315.803
scaffold_213	50328	4	315.803
scaffold_213	117561	4	315.803
scaffold_273	158701	4	315.803
scaffold_273	182216	4	315.803
scaffold_372	25323	4	315.803
scaffold_246	14546	4	319.605
scaffold_272	110524	4	319.605
scaffold_272	245904	4	319.605
scaffold_545	85261	4	319.605
scaffold_246	25459	4	319.605
scaffold_272	230679	4	319.605
scaffold_346	38207	4	323.348
scaffold_432	133648	4	323.348
scaffold_272	109326	4	328.858
scaffold_545	85255	4	328.858
scaffold_545	85260	4	328.858
scaffold_123	247495	4	332.18
scaffold_123	212330	4	332.18
scaffold_346	16537	4	335.495
scaffold_638	32587	4	335.495
scaffold_432	29415	4	335.495
scaffold_638	60606	4	335.495
scaffold_432	131756	4	335.495
scaffold_329	37191	4	337.429
scaffold_329	39140	4	337.429
scaffold_329	81173	4	337.429
scaffold_329	81105	4	337.429
scaffold_329	59659	4	337.429
scaffold_898	37545	4	338.8
scaffold_898	37614	4	338.8
scaffold_816	13796	4	338.8
scaffold_391	133999	4	341.543
scaffold_391	134026	4	341.543
scaffold_391	134041	4	341.543
scaffold_476	104406	4	344.285
scaffold_115	12222	4	347.783
scaffold_1009	4246	4	350.44
scaffold_1057	14140	4	350.44
scaffold_1057	19432	4	350.44
scaffold_115	184800	4	350.44
scaffold_115	244106	4	350.44
scaffold_115	335185	4	350.44
scaffold_1444	8025	4	350.44
scaffold_297	9200	4	350.44
scaffold_297	9207	4	350.44
scaffold_297	162079	4	350.44
scaffold_297	201027	4	350.44
scaffold_334	71145	4	350.44
scaffold_334	85846	4	350.44
scaffold_334	103710	4	350.44
scaffold_485	102424	4	350.44
scaffold_485	118557	4	350.44
scaffold_485	129989	4	350.44
scaffold_297	182347	4	350.44
scaffold_598	128498	4	350.44
scaffold_1110	50994	4	353.999
scaffold_1110	51047	4	353.999
scaffold_1333	25162	4	361.174
scaffold_598	31092	4	361.174
scaffold_598	31093	4	361.174
scaffold_683	77235	4	365.552
scaffold_1141	29460	4	367.105
scaffold_588	22517	4	367.105
scaffold_637	38908	4	367.105
scaffold_637	55290	4	367.105
scaffold_637	55292	4	367.105
scaffold_860	9460	4	367.105
scaffold_860	13420	4	367.105
scaffold_1781	14001	4	371.668
scaffold_8	760111	4	371.668
scaffold_869	12889	4	371.668
scaffold_588	80488	4	371.668
scaffold_8	718943	4	371.668
scaffold_8	718944	4	371.668
scaffold_860	2791	4	371.668
scaffold_8	670936	4	374.783
scaffold_8	670974	4	374.783
scaffold_8	690146	4	374.783
scaffold_8	690169	4	374.783
scaffold_103	226502	4	377.429
scaffold_2329	2327	4	377.429
scaffold_8	211833	4	377.429
scaffold_8	398093	4	377.429
scaffold_8	486074	4	377.429
scaffold_8	603387	4	377.429
scaffold_8	637741	4	377.429
scaffold_8	637745	4	377.429
scaffold_8	294396	4	377.429
scaffold_8	354137	4	377.429
scaffold_8	622827	4	377.429
scaffold_103	333825	4	381.456
scaffold_103	333844	4	381.456
scaffold_585	9677	4	387.298
scaffold_4	259872	4	390.04
scaffold_4	355923	4	390.04
scaffold_4	441087	4	390.04
scaffold_4	684521	4	390.04
scaffold_4	235535	4	390.04
scaffold_4	702553	4	392.828
scaffold_4	754948	4	392.828
scaffold_2258	2265	4	395.453
scaffold_411	44590	4	395.453
scaffold_411	44617	4	395.453
scaffold_411	44637	4	395.453
scaffold_1	71772	4	397.149
scaffold_1	71802	4	397.149
scaffold_1	79917	4	397.149
scaffold_1	289026	4	397.149
scaffold_1	342018	4	397.149
scaffold_1	342021	4	397.149
scaffold_1	381154	4	397.149
scaffold_1	607732	4	400.364
scaffold_1	607747	4	400.364
scaffold_1	607753	4	400.364
scaffold_1	778957	4	400.364
scaffold_1	779017	4	400.364
scaffold_1	634729	4	400.364
scaffold_1	981030	4	402.285
scaffold_1	845685	4	402.285
scaffold_1	950743	4	402.285
scaffold_1	1010259	4	404.19
scaffold_1	1180904	4	404.19
scaffold_1	1291825	4	404.19
scaffold_1	1291835	4	404.19
scaffold_1	1291878	4	404.19
scaffold_1	1368191	4	404.19
scaffold_1	1494916	4	404.19
scaffold_21	290367	5	0
scaffold_2	598679	5	0
scaffold_2	1065489	5	0
scaffold_2	1065499	5	0
scaffold_2	165838	5	0
scaffold_21	249022	5	0
scaffold_21	564162	5	0
scaffold_2	258983	5	0
scaffold_2	259008	5	0
scaffold_2	396649	5	0
scaffold_2	719485	5	0
scaffold_2	737205	5	0
scaffold_2	780318	5	0
scaffold_2	780327	5	0
scaffold_2	793145	5	0
scaffold_2	793152	5	0
scaffold_2	901687	5	0
scaffold_21	78355	5	0
scaffold_253	54768	5	0
scaffold_30	54709	5	0
scaffold_30	54713	5	0
scaffold_30	207036	5	0
scaffold_30	218614	5	0
scaffold_2	19122	5	0
scaffold_253	46932	5	0
scaffold_21	585283	5	3.81505
scaffold_21	477478	5	3.81505
scaffold_21	477492	5	3.81505
scaffold_21	477504	5	3.81505
scaffold_149	79097	5	6.21799
scaffold_149	213930	5	11.7403
scaffold_362	51709	5	11.7403
scaffold_362	121303	5	11.7403
scaffold_657	9252	5	11.7403
scaffold_657	9258	5	11.7403
scaffold_657	9278	5	11.7403
scaffold_362	121298	5	11.7403
scaffold_657	31639	5	11.7403
scaffold_149	175703	5	11.7403
scaffold_294	79202	5	14.9888
scaffold_294	39503	5	14.9888
scaffold_294	39533	5	14.9888
scaffold_294	218091	5	18.2492
scaffold_294	218126	5	18.2492
scaffold_197	226776	5	23.0829
scaffold_13	91026	5	23.0829
scaffold_1213	19792	5	23.0829
scaffold_13	61130	5	23.0829
scaffold_13	104343	5	23.0829
scaffold_13	104351	5	23.0829
scaffold_294	253152	5	23.0829
scaffold_294	253163	5	23.0829
scaffold_294	253180	5	23.0829
scaffold_294	253181	5	23.0829
scaffold_294	253186	5	23.0829
scaffold_294	253189	5	23.0829
scaffold_294	253191	5	23.0829
scaffold_13	646989	5	27.5623
scaffold_417	171431	5	27.5623
scaffold_420	119405	5	30.8722
scaffold_417	9842	5	30.8722
scaffold_386	106667	5	33.6147
scaffold_386	131534	5	33.6147
scaffold_407	153408	5	33.6147
scaffold_420	77182	5	33.6147
scaffold_420	77185	5	33.6147
scaffold_420	77195	5	33.6147
scaffold_420	78267	5	33.6147
scaffold_164	143410	5	33.6147
scaffold_420	78297	5	33.6147
scaffold_420	78300	5	33.6147
scaffold_420	103166	5	33.6147
scaffold_62	443141	5	36.3574
scaffold_62	443192	5	36.3574
scaffold_62	311804	5	37.7277
scaffold_62	317397	5	37.7277
scaffold_28	273169	5	41.8687
scaffold_335	156933	5	41.8687
scaffold_335	211363	5	41.8687
scaffold_62	57220	5	41.8687
scaffold_62	61080	5	41.8687
scaffold_62	79188	5	41.8687
scaffold_335	146626	5	41.8687
scaffold_335	211332	5	41.8687
scaffold_62	20149	5	41.8687
scaffold_28	20242	5	43.2609
scaffold_244	240481	5	46.1071
scaffold_374	24221	5	46.1071
scaffold_374	78658	5	46.1071
scaffold_374	155184	5	46.1071
scaffold_609	83665	5	49.9045
scaffold_95	245561	5	52.3098
scaffold_95	22466	5	54.2241
scaffold_220	243936	5	55.6598
scaffold_95	7431	5	55.6598
scaffold_95	7441	5	55.6598
scaffold_95	7460	5	55.6598
scaffold_95	7488	5	55.6598
scaffold_220	112224	5	55.6598
scaffold_122	208765	5	58.727
scaffold_224	1326	5	65.6897
scaffold_224	1351	5	65.6897
scaffold_224	18710	5	65.6897
scaffold_224	24717	5	65.6897
scaffold_224	24721	5	65.6897
scaffold_224	24763	5	65.6897
scaffold_442	49557	5	65.6897
scaffold_442	128657	5	65.6897
scaffold_224	6509	5	65.6897
scaffold_224	18671	5	65.6897
scaffold_224	18678	5	65.6897
scaffold_224	22684	5	65.6897
scaffold_224	22692	5	65.6897
scaffold_224	22693	5	65.6897
scaffold_442	69266	5	65.6897
scaffold_442	74792	5	65.6897
scaffold_26	265546	5	69.5315
scaffold_26	468946	5	69.5315
scaffold_26	468923	5	69.5315
scaffold_26	132926	5	69.5315
scaffold_26	490231	5	69.5315
scaffold_26	156560	5	69.5315
scaffold_26	156621	5	69.5315
scaffold_26	156627	5	69.5315
scaffold_442	8263	5	69.5315
scaffold_26	410144	5	69.5315
scaffold_26	410160	5	69.5315
scaffold_26	577711	5	69.5315
scaffold_442	8254	5	69.5315
scaffold_415	2728	5	71.9321
scaffold_500	134727	5	71.9321
scaffold_500	134738	5	71.9321
scaffold_500	134772	5	71.9321
scaffold_500	134782	5	71.9321
scaffold_415	67646	5	71.9321
scaffold_500	16175	5	71.9321
scaffold_500	27931	5	71.9321
scaffold_500	27960	5	71.9321
scaffold_26	44677	5	71.9321
scaffold_26	44680	5	71.9321
scaffold_26	44707	5	71.9321
scaffold_26	44722	5	71.9321
scaffold_26	44747	5	71.9321
scaffold_400	15127	5	74.0288
scaffold_400	172887	5	80.0193
scaffold_400	112065	5	80.0193
scaffold_400	149182	5	80.0193
scaffold_415	103695	5	80.0193
scaffold_400	129600	5	80.0193
scaffold_400	129622	5	80.0193
scaffold_208	191660	5	80.0193
scaffold_208	197901	5	80.0193
scaffold_208	278130	5	80.0193
scaffold_400	36637	5	80.0193
scaffold_400	123220	5	80.0193
scaffold_400	123226	5	80.0193
scaffold_400	123244	5	80.0193
scaffold_400	123294	5	80.0193
scaffold_208	278129	5	80.0193
scaffold_400	78688	5	80.0193
scaffold_452	52734	5	85.8105
scaffold_189	112187	5	85.8105
scaffold_189	141321	5	85.8105
scaffold_189	182202	5	85.8105
scaffold_361	86406	5	85.8105
scaffold_413	90425	5	85.8105
scaffold_413	94733	5	85.8105
scaffold_413	102936	5	85.8105
scaffold_515	5275	5	85.8105
scaffold_515	5288	5	85.8105
scaffold_515	5294	5	85.8105
scaffold_515	5331	5	85.8105
scaffold_515	34068	5	85.8105
scaffold_515	108648	5	85.8105
scaffold_515	108668	5	85.8105
scaffold_413	94413	5	85.8105
[truncated: 659 more rows]

## Sheet: Family14
Scaffold ID	scaffold position	LG	genetic position
scaffold_28	150642	1	0
scaffold_151	64019	1	23.6451
scaffold_151	64016	1	23.6451
scaffold_151	64024	1	23.6451
scaffold_7	802	1	47.4948
scaffold_7	62155	1	47.4948
scaffold_176	269024	1	47.4948
scaffold_608	92977	1	47.4948
scaffold_7	281533	1	55.9323
scaffold_7	469161	1	55.9323
scaffold_7	680971	1	58.7301
scaffold_199	205694	1	58.7301
scaffold_1100	32295	1	67.2151
scaffold_1100	32284	1	67.2151
scaffold_1100	32299	1	67.2151
scaffold_194	156964	1	67.2151
scaffold_194	175995	1	67.2151
scaffold_194	283166	1	67.2151
scaffold_194	113085	1	67.2151
scaffold_520	15746	1	67.2151
scaffold_1557	12698	1	70.3691
scaffold_194	5383	1	70.3691
scaffold_520	65666	1	70.3691
scaffold_520	122431	1	70.3691
scaffold_151	132735	1	75.559
scaffold_151	265130	1	78.739
scaffold_151	245370	1	78.739
scaffold_151	245407	1	78.739
scaffold_151	265122	1	78.739
scaffold_151	343225	1	78.739
scaffold_151	265152	1	78.739
scaffold_151	265151	1	78.739
scaffold_463	133320	1	85.2762
scaffold_463	133321	1	85.2762
scaffold_463	151509	1	85.2762
scaffold_463	118907	1	85.2762
scaffold_463	154037	1	85.2762
scaffold_177	10156	1	85.2762
scaffold_177	136268	1	85.2762
scaffold_177	273315	1	85.2762
scaffold_177	133301	1	85.2762
scaffold_177	31599	1	85.2762
scaffold_177	71760	1	85.2762
scaffold_177	133304	1	85.2762
scaffold_177	136250	1	85.2762
scaffold_177	133338	1	85.2762
scaffold_177	273345	1	88.1017
scaffold_177	263112	1	88.1017
scaffold_281	219066	1	91.3072
scaffold_124	265054	1	95.2873
scaffold_124	265107	1	95.2873
scaffold_124	43880	1	95.2873
scaffold_308	189615	1	101.145
scaffold_675	48524	1	101.145
scaffold_536	61981	1	101.145
scaffold_308	236486	1	101.145
scaffold_80	29103	1	101.145
scaffold_675	25777	1	101.145
scaffold_308	110289	1	101.145
scaffold_308	61207	1	101.145
scaffold_80	58219	1	105.185
scaffold_80	342305	1	108.475
scaffold_360	88316	1	108.475
scaffold_300	140786	1	108.475
scaffold_360	34756	1	108.475
scaffold_80	421361	1	108.475
scaffold_300	37286	1	108.475
scaffold_360	34742	1	108.475
scaffold_80	185111	1	108.475
scaffold_360	80964	1	108.475
scaffold_300	37344	1	108.475
scaffold_54	37501	1	112.101
scaffold_54	37471	1	112.101
scaffold_54	37521	1	112.101
scaffold_300	244358	1	112.101
scaffold_300	237394	1	112.101
scaffold_300	244278	1	112.101
scaffold_300	244294	1	112.101
scaffold_54	86792	1	114.498
scaffold_54	86746	1	114.498
scaffold_54	168826	1	116.473
scaffold_54	118283	1	116.473
scaffold_54	168841	1	116.473
scaffold_54	118273	1	116.473
scaffold_54	203203	1	116.473
scaffold_54	169841	1	116.473
scaffold_54	394918	1	119.283
scaffold_342	31455	1	123.693
scaffold_488	41388	1	123.693
scaffold_613	88319	1	123.693
scaffold_1542	3723	1	123.693
scaffold_1551	20043	1	123.693
scaffold_613	100406	1	123.693
scaffold_56	272384	1	123.693
scaffold_457	118698	1	123.693
scaffold_56	285393	1	123.693
scaffold_56	290159	1	123.693
scaffold_659	70735	1	123.693
scaffold_457	42831	1	123.693
scaffold_56	185996	1	123.693
scaffold_56	89328	1	123.693
scaffold_56	134146	1	123.693
scaffold_56	58541	1	123.693
scaffold_56	18631	1	123.693
scaffold_342	188404	1	129.802
scaffold_342	208618	1	129.802
scaffold_165	99029	1	131.405
scaffold_165	92570	1	131.405
scaffold_342	201290	1	131.405
scaffold_165	269324	1	132.238
scaffold_165	236432	1	132.238
scaffold_129	239777	1	134.74
scaffold_129	288042	1	135.582
scaffold_1190	6618	1	135.582
scaffold_426	1469	1	135.582
scaffold_129	269267	1	135.582
scaffold_1190	4739	1	135.582
scaffold_107	22802	1	137.257
scaffold_107	350566	1	138.09
scaffold_107	169102	1	138.09
scaffold_107	280443	1	138.09
scaffold_29	297120	1	140.592
scaffold_29	398349	1	142.132
scaffold_707	23220	1	143.672
scaffold_29	384034	1	143.672
scaffold_707	23763	1	143.672
scaffold_29	384043	1	143.672
scaffold_707	23738	1	143.672
scaffold_198	298787	1	144.553
scaffold_198	298777	1	144.553
scaffold_198	286788	1	144.553
scaffold_198	298859	1	144.553
scaffold_198	298765	1	144.553
scaffold_198	298809	1	144.553
scaffold_198	298804	1	144.553
scaffold_198	298901	1	144.553
scaffold_198	298908	1	144.553
scaffold_198	298871	1	144.553
scaffold_198	298879	1	144.553
scaffold_198	298858	1	144.553
scaffold_198	298866	1	144.553
scaffold_198	23188	1	145.666
scaffold_198	265617	1	145.666
scaffold_198	200511	1	145.666
scaffold_43	475127	1	145.666
scaffold_43	437412	1	145.666
scaffold_198	232937	1	145.666
scaffold_43	437414	1	145.666
scaffold_198	200502	1	145.666
scaffold_198	63469	1	145.666
scaffold_43	437417	1	145.666
scaffold_43	155311	1	147.489
scaffold_43	246725	1	147.489
scaffold_64	240794	1	148.677
scaffold_64	322235	1	148.677
scaffold_64	64874	1	148.677
scaffold_64	64899	1	148.677
scaffold_43	18167	1	148.677
scaffold_41	41685	1	153.253
scaffold_64	428812	1	153.253
scaffold_41	37869	1	153.253
scaffold_41	205219	1	156.358
scaffold_41	187457	1	156.358
scaffold_41	261706	1	158.044
scaffold_41	343294	1	158.044
scaffold_41	300765	1	158.044
scaffold_41	300743	1	158.044
scaffold_41	458466	1	162.632
scaffold_41	442356	1	162.632
scaffold_32	334492	1	162.632
scaffold_32	459098	1	162.632
scaffold_41	422031	1	162.632
scaffold_32	469383	1	162.632
scaffold_32	227224	1	162.632
scaffold_32	472759	1	162.632
scaffold_41	458478	1	162.632
scaffold_32	472835	1	162.632
scaffold_32	77958	1	164.198
scaffold_32	31185	1	164.198
scaffold_339	163325	1	164.198
scaffold_339	163340	1	164.198
scaffold_118	279786	1	164.198
scaffold_339	172757	1	164.198
scaffold_118	245419	1	165.188
scaffold_55	282479	1	165.188
scaffold_118	245456	1	165.188
scaffold_118	160999	1	165.188
scaffold_118	219758	1	165.188
scaffold_118	102798	1	166.178
scaffold_118	54816	1	166.178
scaffold_55	322561	1	166.178
scaffold_55	337854	1	166.178
scaffold_55	89743	1	167.058
scaffold_55	89730	1	167.058
scaffold_55	24994	1	167.058
scaffold_55	240772	1	167.058
scaffold_55	117137	1	167.058
scaffold_55	25030	1	167.058
scaffold_55	206898	1	167.058
scaffold_55	25020	1	167.058
scaffold_379	49399	1	167.058
scaffold_55	24967	1	167.058
scaffold_766	57409	1	167.938
scaffold_92	35329	1	167.938
scaffold_766	66446	1	167.938
scaffold_92	386117	1	169.409
scaffold_92	135068	1	171.125
scaffold_92	135075	1	171.125
scaffold_55	20283	1	171.125
scaffold_92	139817	1	171.125
scaffold_92	313753	1	173.628
scaffold_179	175766	1	176.711
scaffold_179	188751	1	176.711
scaffold_179	62996	1	178.671
scaffold_179	41141	1	178.671
scaffold_59	156334	1	178.671
scaffold_421	58857	1	178.671
scaffold_421	39565	1	178.671
scaffold_709	6004	1	178.671
scaffold_709	43438	1	178.671
scaffold_179	42382	1	178.671
scaffold_421	40929	1	178.671
scaffold_765	33511	1	178.671
scaffold_421	58805	1	178.671
scaffold_709	43445	1	178.671
scaffold_71	88492	1	180.284
scaffold_71	88493	1	180.284
scaffold_59	964	1	181.175
scaffold_59	921	1	181.175
scaffold_71	345428	1	181.175
scaffold_71	325299	1	181.175
scaffold_71	270723	1	181.175
scaffold_59	942	1	181.175
scaffold_59	940	1	181.175
scaffold_59	8742	1	181.175
scaffold_71	325317	1	181.175
scaffold_59	77616	1	181.175
scaffold_71	304294	1	181.175
scaffold_59	958	1	181.175
scaffold_59	144692	1	182.05
scaffold_59	130339	1	182.05
scaffold_59	229424	1	182.05
scaffold_59	229452	1	182.05
scaffold_59	220416	1	182.05
scaffold_59	260991	1	182.05
scaffold_59	192755	1	182.05
scaffold_59	220420	1	182.05
scaffold_71	412444	1	182.05
scaffold_59	192784	1	182.05
scaffold_59	192747	1	182.05
scaffold_59	192748	1	182.05
scaffold_59	443313	1	183.812
scaffold_59	351266	1	183.812
scaffold_59	346643	1	183.812
scaffold_59	390964	1	183.812
scaffold_59	346610	1	183.812
scaffold_59	346676	1	183.812
scaffold_59	288364	1	183.812
scaffold_59	436795	1	183.812
scaffold_160	96914	1	185.165
scaffold_160	263712	1	188.684
scaffold_568	23925	1	188.684
scaffold_568	25359	1	188.684
scaffold_568	57407	1	188.684
scaffold_568	23903	1	188.684
scaffold_147	195351	1	188.684
scaffold_160	222932	1	188.684
scaffold_568	9933	1	188.684
scaffold_568	18374	1	188.684
scaffold_160	265539	1	188.684
scaffold_160	192056	1	188.684
scaffold_568	88322	1	188.684
scaffold_160	240338	1	188.684
scaffold_160	163601	1	188.684
scaffold_568	25292	1	188.684
scaffold_384	194832	1	195.797
scaffold_384	129355	1	195.797
scaffold_100	385131	1	195.797
scaffold_100	329573	1	196.685
scaffold_100	329575	1	196.685
scaffold_100	306473	1	196.685
scaffold_100	311039	1	196.685
scaffold_100	311098	1	196.685
scaffold_100	200351	1	200.336
scaffold_100	116196	1	204.779
scaffold_100	116176	1	204.779
scaffold_100	65426	1	204.779
scaffold_100	57056	1	204.779
scaffold_100	57038	1	204.779
scaffold_763	26859	1	204.779
scaffold_100	50652	1	204.779
scaffold_236	1063	1	208.368
scaffold_236	163755	1	213.144
scaffold_236	163816	1	213.144
scaffold_236	163820	1	213.144
scaffold_167	318353	1	213.144
scaffold_479	21750	1	213.144
scaffold_167	285900	1	213.144
scaffold_236	83013	1	213.144
scaffold_236	189928	1	213.144
scaffold_236	177854	1	213.144
scaffold_236	189932	1	213.144
scaffold_479	105951	1	213.144
scaffold_428	55105	1	218.142
scaffold_428	41581	1	218.142
scaffold_428	79859	1	220.014
scaffold_428	79875	1	220.014
scaffold_225	139978	1	221.861
scaffold_730	61999	1	229.045
scaffold_730	61996	1	229.045
scaffold_215	186296	1	229.045
scaffold_1936	11976	1	229.045
scaffold_519	14610	1	229.045
scaffold_215	90611	1	229.045
scaffold_133	296609	1	229.045
scaffold_133	304955	1	229.045
scaffold_133	304952	1	229.045
scaffold_1536	17713	1	229.045
scaffold_492	84032	1	229.045
scaffold_730	50919	1	229.045
scaffold_519	34977	1	229.045
scaffold_730	50935	1	229.045
scaffold_133	104612	1	229.045
scaffold_133	104600	1	229.045
scaffold_133	104557	1	229.045
scaffold_133	104571	1	229.045
scaffold_133	104628	1	229.045
scaffold_133	104625	1	229.045
scaffold_215	20121	1	229.045
scaffold_1038	33134	1	229.045
scaffold_215	20112	1	229.045
scaffold_796	65941	1	229.045
scaffold_133	262030	1	229.045
scaffold_133	262024	1	229.045
scaffold_133	262044	1	229.045
scaffold_133	262054	1	229.045
scaffold_248	240375	1	235.2
scaffold_344	173137	1	235.2
scaffold_344	173123	1	235.2
scaffold_248	240384	1	235.2
scaffold_248	240386	1	235.2
scaffold_248	240371	1	235.2
scaffold_344	150499	1	235.2
scaffold_248	102099	1	235.2
scaffold_248	59845	1	235.2
scaffold_344	150503	1	235.2
scaffold_248	57466	1	235.2
scaffold_344	127510	1	235.2
scaffold_344	153954	1	235.2
scaffold_344	153931	1	235.2
scaffold_248	129772	1	235.2
scaffold_248	270500	1	235.2
scaffold_248	68476	1	235.2
scaffold_344	97462	1	235.2
scaffold_258	259676	1	235.2
scaffold_248	161732	1	235.2
scaffold_248	161710	1	235.2
scaffold_248	244294	1	235.2
scaffold_258	234401	1	235.2
scaffold_248	89795	1	235.2
scaffold_258	246887	1	235.2
scaffold_215	227101	1	239.812
scaffold_215	227161	1	239.812
scaffold_215	227634	1	239.812
scaffold_215	199608	1	239.812
scaffold_215	227670	1	239.812
scaffold_258	117228	1	241.815
scaffold_215	186286	1	241.815
scaffold_344	49776	1	246.833
scaffold_344	59559	1	246.833
scaffold_344	7266	1	247.893
scaffold_513	47024	1	250.486
scaffold_424	114137	1	250.486
scaffold_424	114182	1	250.486
scaffold_513	76111	1	250.486
scaffold_424	38143	1	250.486
scaffold_513	47062	1	250.486
scaffold_642	10905	1	250.486
scaffold_424	114168	1	250.486
scaffold_424	18692	1	250.486
scaffold_1310	14176	1	250.486
scaffold_513	76110	1	250.486
scaffold_642	55374	1	252.894
scaffold_508	90912	1	254.322
scaffold_508	90911	1	254.322
scaffold_508	108484	1	254.322
scaffold_508	35598	1	254.322
scaffold_508	85857	1	254.322
scaffold_508	35597	1	254.322
scaffold_508	109030	1	254.322
scaffold_190	314464	1	255.57
scaffold_190	281467	1	258.422
scaffold_190	281482	1	258.422
scaffold_190	281464	1	258.422
scaffold_190	255506	1	258.422
scaffold_190	296546	1	258.422
scaffold_190	296536	1	258.422
scaffold_190	296531	1	258.422
scaffold_190	130404	1	262.491
scaffold_190	113198	1	262.491
scaffold_190	29735	1	262.491
scaffold_190	173941	1	262.491
scaffold_190	171538	1	262.491
scaffold_190	128274	1	262.491
scaffold_97	149726	1	265.579
scaffold_97	149754	1	265.579
scaffold_97	15509	1	265.579
scaffold_97	175779	1	265.579
scaffold_97	15525	1	265.579
scaffold_97	175793	1	265.579
scaffold_97	115927	1	265.579
scaffold_97	263915	1	266.424
scaffold_97	188110	1	266.424
scaffold_97	148839	1	266.424
scaffold_97	188118	1	266.424
scaffold_97	311162	1	267.261
scaffold_97	208016	1	267.261
scaffold_97	208044	1	267.261
scaffold_97	397794	1	268.095
scaffold_15	85640	1	269.916
scaffold_15	82955	1	269.916
scaffold_15	187482	1	271.233
scaffold_15	175887	1	271.233
scaffold_15	186975	1	271.233
scaffold_15	186944	1	271.233
scaffold_15	175889	1	271.233
scaffold_15	186970	1	271.233
scaffold_15	186955	1	271.233
scaffold_15	209686	1	272.067
scaffold_15	237071	1	272.067
scaffold_15	468470	1	273.733
scaffold_15	468437	1	273.733
scaffold_15	468477	1	273.733
scaffold_15	451115	1	273.733
scaffold_15	575210	1	273.733
scaffold_15	646358	1	273.733
scaffold_283	139322	1	273.733
scaffold_150	259242	1	275.371
scaffold_90	69883	1	275.371
scaffold_283	43464	1	275.371
scaffold_150	259255	1	275.371
scaffold_150	307045	1	275.371
scaffold_150	259249	1	275.371
scaffold_283	14791	1	275.371
scaffold_283	86078	1	275.371
scaffold_283	93421	1	275.371
scaffold_283	93367	1	275.371
scaffold_90	189451	1	277.878
scaffold_283	49453	1	277.878
scaffold_90	289995	1	278.717
scaffold_94	20714	1	279.55
scaffold_94	190401	1	280.466
scaffold_94	208697	1	281.452
scaffold_805	3656	1	281.452
scaffold_94	208664	1	281.452
scaffold_805	43858	1	281.452
scaffold_94	328233	1	281.452
scaffold_37	448860	1	281.452
scaffold_94	244000	1	281.452
scaffold_94	208698	1	281.452
scaffold_94	239788	1	281.452
scaffold_94	208687	1	281.452
scaffold_37	431845	1	281.452
scaffold_37	448881	1	281.452
scaffold_94	244829	1	281.452
scaffold_37	158350	1	286.674
scaffold_37	16654	1	286.674
scaffold_37	79386	1	288.626
scaffold_37	79337	1	288.626
scaffold_850	26452	1	289.473
scaffold_73	218201	1	292.812
scaffold_73	134884	1	292.812
scaffold_73	123446	1	292.812
scaffold_73	99788	1	292.812
scaffold_73	218173	1	292.812
scaffold_73	123439	1	292.812
scaffold_73	123431	1	292.812
scaffold_73	123440	1	292.812
scaffold_288	98499	1	292.812
scaffold_73	225640	1	292.812
scaffold_514	38089	1	294.511
scaffold_73	35650	1	294.511
scaffold_73	35981	1	294.511
scaffold_514	25393	1	294.511
scaffold_252	177260	1	295.377
scaffold_252	177259	1	295.377
scaffold_252	112273	1	295.377
scaffold_72	269418	1	296.242
scaffold_252	114614	1	296.242
scaffold_252	209399	1	296.242
scaffold_252	66472	1	296.242
scaffold_252	209402	1	296.242
scaffold_252	209483	1	296.242
scaffold_72	253134	1	296.242
scaffold_252	66463	1	296.242
scaffold_252	157098	1	296.242
scaffold_72	218456	1	296.242
scaffold_72	218449	1	296.242
scaffold_72	370081	1	296.242
scaffold_72	207321	1	296.242
scaffold_72	238124	1	297.327
scaffold_72	70081	1	299.35
scaffold_72	96389	1	299.35
scaffold_58	61208	1	300.545
scaffold_58	198206	1	300.545
scaffold_91	100872	1	302.236
scaffold_91	100860	1	302.236
scaffold_58	418180	1	302.236
scaffold_632	72335	1	302.236
scaffold_58	51498	1	302.236
scaffold_72	8222	1	302.236
scaffold_102	81646	1	306.96
scaffold_102	72356	1	306.96
scaffold_102	250149	1	306.96
scaffold_102	304562	1	306.96
scaffold_102	72378	1	306.96
scaffold_593	32004	1	306.96
scaffold_102	81603	1	306.96
scaffold_102	48375	1	308.116
scaffold_267	44878	1	308.116
scaffold_267	41183	1	308.116
scaffold_102	81666	1	308.116
scaffold_267	73181	1	309.105
scaffold_267	73201	1	309.105
scaffold_267	146305	1	309.105
scaffold_267	151035	1	309.105
scaffold_267	191702	1	310.335
scaffold_267	191701	1	310.335
scaffold_18	587343	1	310.335
scaffold_267	199670	1	310.335
scaffold_267	154335	1	310.335
scaffold_18	398604	1	313.368
scaffold_18	312332	1	315.166
scaffold_18	54606	1	315.166
scaffold_18	161947	1	315.166
scaffold_18	162005	1	315.166
scaffold_18	79432	1	315.166
scaffold_63	84189	1	316.785
scaffold_63	293449	1	321.774
scaffold_63	255737	1	321.774
scaffold_63	255668	1	321.774
scaffold_63	321704	1	321.774
scaffold_63	293514	1	321.774
scaffold_63	293508	1	321.774
scaffold_63	344712	1	322.607
scaffold_63	305888	1	322.607
scaffold_63	305834	1	322.607
scaffold_63	430894	1	324.274
scaffold_114	286387	1	325.836
scaffold_114	331010	1	325.836
scaffold_114	331040	1	325.836
scaffold_114	152511	1	328.785
scaffold_114	48802	1	328.785
scaffold_143	50106	1	330.456
scaffold_143	27819	1	330.456
scaffold_143	45997	1	330.456
scaffold_114	24487	1	330.456
scaffold_143	58448	1	330.456
scaffold_143	259321	1	331.296
scaffold_143	259251	1	331.296
scaffold_143	198777	1	331.296
scaffold_195	25412	1	331.296
scaffold_143	116285	1	331.296
scaffold_195	126688	1	332.129
scaffold_195	209780	1	332.129
scaffold_143	104501	1	332.129
scaffold_143	178743	1	332.129
scaffold_195	139167	1	332.129
scaffold_664	2452	1	333.805
scaffold_380	180849	1	336.59
scaffold_380	199262	1	336.59
scaffold_163	243053	1	336.59
scaffold_111	240153	1	339.349
scaffold_163	91243	1	339.349
scaffold_163	156696	1	339.349
scaffold_163	135998	1	339.349
scaffold_111	240154	1	339.349
scaffold_47	482123	2	0
scaffold_34	537645	2	0
scaffold_47	121253	2	0.849249
scaffold_47	121259	2	0.849249
scaffold_47	121257	2	0.849249
scaffold_47	121255	2	0.849249
scaffold_188	97219	2	2.53417
scaffold_188	137573	2	2.53417
scaffold_188	285825	2	2.53417
scaffold_188	278798	2	2.53417
scaffold_45	13937	2	3.69154
scaffold_188	63747	2	3.69154
scaffold_45	292886	2	5.99102
scaffold_45	292919	2	5.99102
scaffold_178	14513	2	10.2612
scaffold_321	234086	2	10.2612
scaffold_178	14534	2	10.2612
scaffold_120	318473	2	18.6975
scaffold_230	248804	2	18.6975
scaffold_230	96432	2	21.1996
scaffold_595	25280	2	23.0121
scaffold_595	61956	2	23.0121
scaffold_480	84911	2	24.1714
scaffold_1020	25260	2	32.4109
scaffold_1020	25276	2	32.4109
scaffold_537	111619	2	37.8039
scaffold_537	121538	2	37.8039
scaffold_537	107826	2	37.8039
scaffold_537	111233	2	37.8039
scaffold_622	57146	2	46.7454
scaffold_1145	18817	2	46.7454
scaffold_622	82005	2	46.7454
scaffold_1145	26400	2	46.7454
scaffold_688	34656	2	46.7454
scaffold_688	34659	2	46.7454
scaffold_688	34717	2	46.7454
scaffold_645	41020	2	50.4914
scaffold_645	40203	2	50.4914
scaffold_871	16966	2	55.5288
scaffold_698	2981	2	55.5288
scaffold_465	154555	2	55.5288
scaffold_584	58492	2	55.5288
scaffold_719	43633	2	55.5288
scaffold_465	43735	2	59.1927
scaffold_465	43779	2	59.1927
scaffold_1703	16343	2	61.2479
scaffold_1703	16369	2	61.2479
scaffold_1703	16361	2	61.2479
scaffold_1519	21396	2	66.2647
scaffold_889	33667	2	66.2647
scaffold_889	33662	2	66.2647
scaffold_101	323514	2	67.0981
scaffold_101	320623	2	67.0981
scaffold_101	269828	2	67.0981
scaffold_610	61755	2	80.6134
scaffold_1977	8215	2	94.1068
scaffold_972	55736	2	94.1068
scaffold_972	40266	2	96.3168
scaffold_829	57330	2	98.7961
scaffold_829	27729	2	98.7961
scaffold_865	37737	2	98.7961
scaffold_829	27311	2	98.7961
scaffold_972	20172	2	98.7961
scaffold_829	27759	2	98.7961
scaffold_1050	40049	2	98.7961
scaffold_1050	18050	2	98.7961
scaffold_430	87946	2	102.002
scaffold_430	87952	2	102.002
scaffold_430	87931	2	102.002
scaffold_1470	21285	2	102.002
scaffold_430	172923	2	102.002
scaffold_1470	21306	2	102.002
scaffold_303	59782	2	106.194
scaffold_231	185585	2	109.785
scaffold_422	173604	2	109.785
scaffold_231	135159	2	109.785
scaffold_231	214164	2	109.785
scaffold_231	135127	2	109.785
scaffold_303	107483	2	109.785
scaffold_303	94447	2	109.785
scaffold_303	220055	2	109.785
scaffold_791	48927	2	116.016
scaffold_791	48921	2	116.016
scaffold_245	204464	2	116.016
scaffold_245	199304	2	116.016
scaffold_245	199349	2	116.016
scaffold_245	41332	2	116.016
scaffold_245	41349	2	116.016
scaffold_245	199345	2	116.016
scaffold_24	499282	2	124.75
scaffold_24	392903	2	124.75
scaffold_24	392865	2	124.75
scaffold_24	392871	2	124.75
scaffold_245	201772	2	124.75
scaffold_245	201805	2	124.75
scaffold_245	201761	2	124.75
scaffold_24	398930	2	124.75
scaffold_24	398886	2	124.75
scaffold_24	398929	2	124.75
scaffold_24	398877	2	124.75
scaffold_24	398918	2	124.75
scaffold_24	398890	2	124.75
scaffold_286	51917	2	124.75
scaffold_286	51908	2	124.75
scaffold_286	29866	2	124.75
scaffold_24	381047	2	135.329
scaffold_24	361560	2	135.329
scaffold_24	107048	2	145.504
scaffold_24	170316	2	145.504
scaffold_327	163261	2	147.171
scaffold_84	249099	2	155.583
scaffold_84	138728	2	156.473
scaffold_445	108780	2	159.265
scaffold_445	79003	2	159.265
scaffold_445	45371	2	159.265
scaffold_254	25316	2	159.265
scaffold_254	141596	2	159.265
scaffold_254	174870	2	159.265
scaffold_254	170682	2	159.265
scaffold_254	170656	2	159.265
scaffold_254	25260	2	159.265
scaffold_254	141586	2	159.265
scaffold_254	175363	2	159.265
scaffold_254	141626	2	159.265
scaffold_138	154010	2	159.265
scaffold_138	154033	2	159.265
scaffold_445	54630	2	159.265
scaffold_138	73167	2	159.265
scaffold_138	277140	2	159.265
scaffold_445	44350	2	159.265
scaffold_60	336788	2	161.419
scaffold_493	112069	2	161.419
scaffold_60	34282	2	161.419
scaffold_493	112090	2	161.419
scaffold_84	31257	2	161.419
scaffold_84	48758	2	161.419
scaffold_219	272012	2	161.419
scaffold_172	178832	2	162.571
scaffold_157	150498	2	162.571
scaffold_172	19340	2	162.571
scaffold_16	616379	2	162.571
scaffold_16	492183	2	162.571
scaffold_10	144477	2	162.571
scaffold_16	86319	2	162.571
scaffold_16	491696	2	162.571
scaffold_60	456173	2	162.571
scaffold_10	349409	2	162.571
scaffold_16	92215	2	162.571
scaffold_10	325942	2	162.571
scaffold_16	616410	2	162.571
scaffold_10	624985	2	162.571
scaffold_16	179700	2	162.571
scaffold_172	105937	2	162.571
scaffold_172	66755	2	162.571
scaffold_172	66807	2	162.571
scaffold_157	265655	2	162.571
scaffold_16	492751	2	162.571
scaffold_16	492726	2	162.571
scaffold_157	265646	2	162.571
scaffold_157	265647	2	162.571
scaffold_10	61939	2	162.571
scaffold_39	241742	2	164.942
scaffold_39	230997	2	164.942
scaffold_39	81262	2	164.942
scaffold_39	240385	2	164.942
scaffold_39	241690	2	164.942
scaffold_39	81263	2	164.942
scaffold_39	81258	2	164.942
scaffold_39	50365	2	164.942
scaffold_39	81257	2	164.942
scaffold_182	148141	2	164.942
scaffold_182	106408	2	164.942
scaffold_39	454447	2	164.942
scaffold_191	4696	2	165.919
scaffold_191	86771	2	165.919
scaffold_191	86786	2	165.919
scaffold_191	132425	2	166.793
scaffold_191	132446	2	166.793
scaffold_191	132385	2	166.793
scaffold_309	79304	2	169.437
scaffold_309	79352	2	169.437
scaffold_309	116029	2	169.437
scaffold_309	60613	2	169.437
scaffold_309	79347	2	169.437
scaffold_309	35981	2	169.437
scaffold_309	79300	2	169.437
scaffold_309	79302	2	169.437
scaffold_309	79307	2	169.437
scaffold_309	79277	2	169.437
scaffold_309	159803	2	171.715
scaffold_309	159809	2	171.715
scaffold_309	185374	2	171.715
scaffold_507	55711	2	171.715
scaffold_507	55704	2	171.715
scaffold_564	105568	2	173.921
scaffold_309	203210	2	173.921
scaffold_309	203211	2	173.921
scaffold_507	142471	2	173.921
scaffold_564	105500	2	173.921
scaffold_276	222591	2	175.763
scaffold_1473	15781	2	177.431
scaffold_408	159617	2	177.431
scaffold_1182	23880	2	178.264
scaffold_628	22292	2	178.264
scaffold_807	60959	2	179.105
scaffold_846	52640	2	179.105
scaffold_807	60974	2	179.105
scaffold_825	73012	2	181.44
scaffold_226	230134	2	181.44
scaffold_497	16562	2	181.44
scaffold_226	230168	2	181.44
scaffold_226	31635	2	181.44
scaffold_437	117335	2	182.933
scaffold_692	67178	2	182.933
scaffold_437	117347	2	182.933
scaffold_2101	3269	2	182.933
scaffold_437	156411	2	182.933
scaffold_437	117367	2	182.933
scaffold_825	11359	2	182.933
scaffold_825	71524	2	182.933
scaffold_825	11394	2	182.933
scaffold_292	141949	2	184.056
scaffold_292	182001	2	184.056
scaffold_292	69223	2	184.056
scaffold_292	181959	2	184.056
scaffold_292	182267	2	184.056
scaffold_292	69222	2	184.056
scaffold_292	69206	2	184.056
scaffold_629	80369	2	185.328
scaffold_957	14541	2	185.328
scaffold_629	16089	2	185.328
scaffold_629	16115	2	185.328
scaffold_629	15789	2	185.328
scaffold_629	16096	2	185.328
scaffold_957	30682	2	185.328
scaffold_629	80393	2	185.328
scaffold_292	229389	2	185.328
scaffold_945	3361	2	187.356
scaffold_305	162035	2	187.356
scaffold_1492	10675	2	187.356
scaffold_375	156259	2	187.356
scaffold_375	12746	2	187.356
scaffold_945	41193	2	187.356
scaffold_305	173157	2	187.356
scaffold_266	22856	2	187.356
scaffold_305	173199	2	187.356
scaffold_375	156276	2	187.356
scaffold_305	173166	2	187.356
scaffold_472	83945	2	187.356
scaffold_270	213697	2	187.356
scaffold_375	201936	2	187.356
scaffold_305	161994	2	187.356
scaffold_472	83981	2	187.356
scaffold_472	107330	2	187.356
scaffold_375	201893	2	187.356
scaffold_375	156394	2	187.356
scaffold_270	163014	2	188.19
scaffold_166	261805	2	189.023
scaffold_166	261785	2	189.023
scaffold_166	143779	2	189.023
scaffold_991	2238	2	191.232
scaffold_1624	12585	2	193.285
scaffold_1624	12573	2	193.285
scaffold_1624	17771	2	193.285
scaffold_991	54856	2	193.285
scaffold_468	135560	2	195.679
scaffold_1160	28649	2	195.679
scaffold_468	5462	2	196.79
scaffold_468	10960	2	196.79
scaffold_880	15675	2	197.903
scaffold_880	8898	2	197.903
scaffold_880	8885	2	197.903
scaffold_1037	5693	2	199.352
scaffold_1037	5662	2	199.352
scaffold_1172	26539	2	199.352
scaffold_1807	10494	2	199.352
scaffold_1010	22543	2	199.352
scaffold_502	28521	2	202.493
scaffold_1148	27095	2	202.493
scaffold_502	109314	2	205.77
scaffold_502	109283	2	205.77
scaffold_1088	36884	2	205.77
scaffold_1088	36944	2	205.77
scaffold_1088	36951	2	205.77
scaffold_589	109255	2	208.26
scaffold_589	109272	2	208.26
scaffold_491	61155	2	210.34
scaffold_491	48126	2	210.34
scaffold_491	48117	2	210.34
scaffold_589	20664	2	210.34
scaffold_589	31042	2	210.34
scaffold_491	131839	2	214.004
scaffold_839	21758	2	217.983
scaffold_839	21788	2	217.983
scaffold_1871	11194	2	220.336
scaffold_1871	11204	2	220.336
scaffold_1314	9380	2	221.218
scaffold_1314	9376	2	221.218
scaffold_265	206150	2	221.218
scaffold_82	286687	2	222.886
scaffold_265	22063	2	222.886
scaffold_82	234418	2	222.886
scaffold_82	296433	2	222.886
scaffold_265	22135	2	222.886
scaffold_82	154357	2	223.731
scaffold_82	108856	2	223.731
scaffold_82	154309	2	223.731
scaffold_571	109101	2	224.834
scaffold_571	9224	2	224.834
scaffold_304	136527	2	229.762
scaffold_304	57382	2	229.762
scaffold_304	71194	2	229.762
scaffold_304	57445	2	229.762
scaffold_304	39482	2	229.762
scaffold_304	71195	2	229.762
scaffold_859	39652	2	230.595
scaffold_105	63337	2	230.595
scaffold_105	57435	2	231.429
scaffold_105	57428	2	231.429
scaffold_105	132057	2	232.262
scaffold_268	69114	2	234.766
scaffold_218	38290	2	234.766
scaffold_444	10242	2	234.766
scaffold_218	38356	2	234.766
scaffold_268	69117	2	234.766
scaffold_268	64374	2	234.766
scaffold_218	38328	2	234.766
scaffold_797	58926	2	234.766
scaffold_444	10239	2	234.766
scaffold_268	96919	2	234.766
scaffold_105	288291	2	234.766
scaffold_268	182757	2	236.434
scaffold_268	182752	2	236.434
scaffold_239	243888	2	236.434
scaffold_239	115195	2	237.779
scaffold_239	115199	2	237.779
scaffold_239	115180	2	237.779
scaffold_239	31921	2	239.06
scaffold_239	62695	2	239.06
scaffold_83	94134	2	239.06
scaffold_239	56028	2	239.06
scaffold_83	58808	2	239.06
scaffold_83	58792	2	239.06
scaffold_83	355355	2	240.946
scaffold_83	369072	2	240.946
scaffold_83	354567	2	240.946
scaffold_83	369073	2	240.946
scaffold_19	105042	2	242.311
scaffold_19	430637	2	243.643
scaffold_19	462717	2	243.643
scaffold_19	462735	2	243.643
scaffold_19	449588	2	243.643
scaffold_19	462709	2	243.643
scaffold_19	302940	2	243.643
scaffold_19	169819	2	243.643
scaffold_19	186578	2	243.643
scaffold_19	430679	2	243.643
scaffold_443	108261	2	247.093
scaffold_804	32495	2	247.093
scaffold_804	41104	2	247.093
scaffold_804	11782	2	248.129
scaffold_461	55534	2	249.156
scaffold_461	43284	2	249.156
scaffold_461	106830	2	249.156
scaffold_461	55533	2	249.156
scaffold_941	22706	2	252.469
scaffold_615	100375	2	256.044
scaffold_615	47523	2	256.044
scaffold_615	47508	2	256.044
scaffold_533	47955	2	256.877
scaffold_533	101586	2	256.877
scaffold_235	90554	2	261.981
scaffold_235	90563	2	261.981
scaffold_235	172087	2	261.981
scaffold_1058	28179	2	261.981
scaffold_214	161169	2	261.981
scaffold_214	196822	2	261.981
scaffold_385	89326	2	261.981
scaffold_460	111829	2	261.981
scaffold_460	111893	2	261.981
scaffold_93	366537	2	261.981
scaffold_235	172066	2	261.981
scaffold_460	125892	2	261.981
scaffold_385	162753	2	261.981
scaffold_460	57010	2	267.298
scaffold_968	46127	2	267.298
scaffold_23	563288	2	270.636
scaffold_23	449817	2	273.36
scaffold_23	449795	2	273.36
scaffold_23	458161	2	273.36
scaffold_23	442516	2	276.842
scaffold_23	115344	2	279.543
scaffold_23	126004	2	279.543
scaffold_23	126013	2	279.543
scaffold_17	82438	2	279.543
scaffold_17	293222	2	280.619
scaffold_17	267081	2	280.619
scaffold_17	164735	2	280.619
scaffold_17	361557	2	281.452
scaffold_17	361633	2	281.452
scaffold_17	601762	2	288.566
scaffold_17	601777	2	288.566
scaffold_17	601744	2	288.566
scaffold_832	5393	2	288.566
scaffold_832	39673	2	288.566
scaffold_174	309348	2	288.566
scaffold_174	309329	2	288.566
scaffold_79	141476	2	292.96
scaffold_79	118340	2	292.96
scaffold_79	80881	2	292.96
scaffold_79	325216	2	297.725
scaffold_79	208841	2	297.725
scaffold_79	216332	2	297.725
scaffold_3	145570	2	302.313
scaffold_3	405870	2	306.141
scaffold_3	448356	2	308.7
scaffold_3	448332	2	308.7
scaffold_3	632624	2	311.489
scaffold_3	632600	2	311.489
scaffold_3	583515	2	311.489
scaffold_3	569943	2	311.489
scaffold_3	642854	2	311.489
scaffold_3	595376	2	311.489
scaffold_3	728368	2	311.489
scaffold_3	713745	2	312.324
scaffold_3	777648	2	313.993
scaffold_3	791258	2	313.993
scaffold_330	3682	2	315.925
scaffold_330	3708	2	315.925
scaffold_3	867478	2	315.925
scaffold_330	217704	2	315.925
scaffold_973	3097	2	315.925
scaffold_973	3120	2	315.925
scaffold_1635	4437	2	315.925
scaffold_1635	4422	2	315.925
scaffold_1635	4497	2	315.925
scaffold_538	69932	2	315.925
scaffold_538	69925	2	315.925
scaffold_538	95125	2	315.925
scaffold_538	69953	2	315.925
scaffold_856	53086	2	319.536
scaffold_856	53088	2	319.536
scaffold_787	71553	2	319.536
scaffold_960	52280	2	319.536
scaffold_1380	1446	2	320.791
scaffold_769	55401	2	320.791
scaffold_338	69753	2	324.311
scaffold_338	69725	2	324.311
scaffold_338	97624	2	324.311
scaffold_295	83661	2	327.487
scaffold_125	11355	2	327.487
scaffold_295	122639	2	327.487
scaffold_125	11386	2	327.487
scaffold_295	93401	2	327.487
scaffold_295	68533	2	328.323
scaffold_295	68546	2	328.323
scaffold_295	25316	2	329.163
scaffold_431	168007	2	330.004
scaffold_788	69290	2	340.177
scaffold_788	69289	2	340.177
scaffold_788	69311	2	340.177
scaffold_788	70597	2	340.177
scaffold_788	70575	2	340.177
scaffold_1233	7840	2	341.045
scaffold_170	310369	2	349.573
scaffold_170	30626	2	349.573
scaffold_170	280948	2	349.573
scaffold_36	67812	2	349.573
scaffold_36	200405	2	349.573
scaffold_36	207991	2	349.573
scaffold_36	203965	2	349.573
scaffold_36	262081	2	353.812
scaffold_36	386335	2	357.546
scaffold_36	386353	2	357.546
scaffold_36	374419	2	357.546
scaffold_36	317757	2	357.546
scaffold_36	316570	2	357.546
scaffold_36	374477	2	357.546
scaffold_156	6653	2	362.928
scaffold_156	6670	2	362.928
scaffold_156	272349	2	362.928
scaffold_36	112716	2	384.563
scaffold_170	306677	2	384.563
scaffold_36	309652	2	398.572
scaffold_36	432864	2	398.572
scaffold_738	35568	2	414.315
scaffold_1161	13548	2	414.315
scaffold_2019	2740	2	425.492
scaffold_338	69716	2	433.866
scaffold_338	69740	2	433.866
scaffold_338	69752	2	433.866
scaffold_338	69730	2	433.866
scaffold_2241	1483	2	439.399
scaffold_2241	1454	2	439.399
scaffold_697	21087	2	445.24
scaffold_697	21044	2	445.24
scaffold_697	21082	2	445.24
scaffold_3	868462	2	451.204
scaffold_3	642873	2	456.712
scaffold_3	405872	2	464.161
scaffold_79	326697	2	473.323
scaffold_174	200302	2	485.302
scaffold_941	16775	2	507.27
scaffold_580	50396	3	0
scaffold_474	28674	3	0
scaffold_474	39494	3	0
scaffold_1674	8184	3	0
scaffold_319	86202	3	0
scaffold_541	4847	3	0
scaffold_319	162327	3	0
scaffold_503	1860	3	0
scaffold_474	48422	3	0
scaffold_474	48425	3	0
scaffold_474	48428	3	0
scaffold_592	92187	3	0
scaffold_474	126039	3	0
scaffold_834	48793	3	1.24373
scaffold_834	48816	3	1.24373
scaffold_834	29147	3	1.24373
scaffold_834	49286	3	1.24373
scaffold_834	52967	3	1.24373
scaffold_834	49246	3	1.24373
scaffold_834	52959	3	1.24373
scaffold_1004	50970	3	4.14188
scaffold_1004	50993	3	4.14188
scaffold_1004	50942	3	4.14188
scaffold_131	176024	3	5.87417
scaffold_131	64549	3	7.56516
scaffold_131	64528	3	7.56516
scaffold_131	102696	3	7.56516
scaffold_131	75365	3	7.56516
scaffold_131	73465	3	7.56516
scaffold_131	64514	3	7.56516
scaffold_449	112259	3	13.2527
scaffold_449	112330	3	13.2527
scaffold_876	46471	3	13.2527
scaffold_970	40865	3	13.2527
scaffold_1572	6601	3	16.8858
scaffold_1572	6590	3	16.8858
scaffold_1572	6615	3	16.8858
scaffold_1572	6607	3	16.8858
scaffold_970	15237	3	19.3821
scaffold_1247	13986	3	19.3821
scaffold_419	147092	3	19.3821
scaffold_732	80193	3	25.1497
scaffold_370	8384	3	25.1497
scaffold_370	21544	3	25.1497
scaffold_370	88841	3	26.0492
scaffold_370	161916	3	26.9487
scaffold_370	161857	3	26.9487
scaffold_370	140816	3	26.9487
scaffold_370	140797	3	26.9487
scaffold_370	140778	3	26.9487
scaffold_401	83500	3	27.7828
scaffold_401	83524	3	27.7828
scaffold_401	33710	3	29.4509
scaffold_441	20938	3	29.4509
scaffold_441	96562	3	29.4509
scaffold_401	33712	3	29.4509
scaffold_441	39911	3	29.4509
scaffold_14	337969	3	31.9749
scaffold_14	248628	3	31.9749
scaffold_14	338027	3	31.9749
scaffold_14	337971	3	31.9749
scaffold_14	248672	3	31.9749
scaffold_14	241616	3	33.3524
scaffold_14	41508	3	33.3524
scaffold_14	301650	3	33.3524
scaffold_14	74340	3	33.3524
scaffold_14	194641	3	33.3524
scaffold_14	41529	3	33.3524
scaffold_574	43362	3	33.3524
scaffold_14	202242	3	33.3524
scaffold_14	194643	3	33.3524
scaffold_14	194649	3	33.3524
scaffold_14	241602	3	33.3524
scaffold_685	87366	3	34.5755
scaffold_715	35726	3	34.5755
scaffold_14	582775	3	34.5755
scaffold_685	87336	3	34.5755
scaffold_715	35742	3	34.5755
scaffold_1070	15119	3	39.8864
scaffold_1616	22408	3	39.8864
scaffold_1070	15054	3	39.8864
scaffold_672	18616	3	39.8864
scaffold_672	72935	3	39.8864
scaffold_672	18607	3	39.8864
scaffold_672	18587	3	39.8864
scaffold_672	72905	3	39.8864
scaffold_678	119041	3	39.8864
scaffold_678	119116	3	39.8864
scaffold_14	462393	3	53.7462
scaffold_1384	28632	3	74.9622
scaffold_207	176000	3	74.9622
scaffold_207	151416	3	74.9622
scaffold_9	237316	3	74.9622
scaffold_9	692838	3	74.9622
scaffold_9	692844	3	74.9622
scaffold_9	692837	3	74.9622
scaffold_9	692842	3	74.9622
scaffold_9	692862	3	74.9622
scaffold_9	501006	3	74.9622
scaffold_207	250806	3	80.9534
scaffold_328	96149	3	90.1507
scaffold_328	96163	3	101.073
scaffold_331	135660	3	101.981
scaffold_331	135722	3	101.981
scaffold_331	127761	3	101.981
scaffold_331	127720	3	101.981
scaffold_331	127727	3	101.981
scaffold_331	135669	3	101.981
scaffold_331	135674	3	101.981
scaffold_331	135723	3	101.981
scaffold_331	135714	3	101.981
scaffold_427	81397	3	103.672
scaffold_427	67676	3	103.672
scaffold_1652	8081	3	103.672
scaffold_427	81331	3	103.672
scaffold_2192	5336	3	103.672
scaffold_1526	11019	3	103.672
scaffold_559	81102	3	103.672
scaffold_9	15884	3	104.696
scaffold_9	15920	3	104.696
scaffold_9	108650	3	108.005
scaffold_9	145566	3	110.869
scaffold_9	154015	3	110.869
scaffold_9	154024	3	110.869
scaffold_9	198623	3	112.74
scaffold_9	217940	3	112.74
scaffold_9	198641	3	112.74
scaffold_9	243042	3	113.574
scaffold_9	276749	3	114.407
scaffold_9	293736	3	114.407
scaffold_9	414021	3	116.075
scaffold_9	390954	3	116.075
scaffold_9	433677	3	116.075
scaffold_9	390960	3	116.075
scaffold_9	539328	3	116.075
scaffold_9	662864	3	116.909
scaffold_171	326809	3	117.743
scaffold_171	326830	3	117.743
scaffold_171	105345	3	122.475
scaffold_171	136503	3	122.475
scaffold_171	68593	3	125.307
scaffold_171	31130	3	125.307
scaffold_872	69644	3	128.186
scaffold_1015	25162	3	130.45
scaffold_293	206089	3	130.45
scaffold_1845	3875	3	130.45
scaffold_616	23604	3	130.45
scaffold_616	69122	3	130.45
scaffold_293	165867	3	130.45
scaffold_293	176262	3	130.45
scaffold_293	165910	3	130.45
scaffold_186	158418	3	130.45
scaffold_884	36992	3	130.45
scaffold_830	27208	3	130.45
scaffold_969	46930	3	130.45
scaffold_1460	12465	3	130.45
scaffold_1041	23340	3	130.45
scaffold_616	23606	3	130.45
scaffold_293	159906	3	133.302
scaffold_293	18324	3	133.302
scaffold_293	133845	3	133.302
scaffold_293	133854	3	133.302
scaffold_293	156430	3	133.302
scaffold_293	18304	3	133.302
scaffold_611	93841	3	133.302
scaffold_293	140376	3	133.302
scaffold_293	159900	3	133.302
scaffold_611	101712	3	133.302
scaffold_293	156452	3	133.302
scaffold_293	140388	3	133.302
scaffold_1225	20638	3	135.505
scaffold_1225	17037	3	135.505
scaffold_145	301405	3	137.031
scaffold_145	301446	3	137.031
scaffold_3688	662	3	137.031
scaffold_145	240900	3	137.031
scaffold_155	282530	3	137.031
scaffold_145	301421	3	137.031
scaffold_145	188914	3	137.031
scaffold_155	282480	3	137.031
scaffold_145	188921	3	137.031
scaffold_155	282521	3	137.031
scaffold_145	86521	3	137.031
scaffold_145	86483	3	137.031
scaffold_155	282511	3	137.031
scaffold_145	188900	3	137.031
scaffold_145	188895	3	137.031
scaffold_155	73608	3	138.698
scaffold_155	73565	3	138.698
scaffold_155	279839	3	138.698
scaffold_155	279872	3	138.698
scaffold_446	99583	3	138.698
scaffold_446	78988	3	139.532
scaffold_600	40081	3	139.532
scaffold_600	40061	3	139.532
scaffold_1307	3104	3	139.532
scaffold_792	26757	3	140.438
scaffold_914	60795	3	140.438
scaffold_1952	9481	3	140.438
scaffold_1952	9472	3	140.438
scaffold_1952	9486	3	140.438
scaffold_1952	13226	3	140.438
scaffold_1952	13751	3	140.438
scaffold_1424	24819	3	140.438
scaffold_1424	24775	3	140.438
scaffold_792	47710	3	142.357
scaffold_148	102178	3	145.362
scaffold_148	72378	3	145.362
scaffold_148	113564	3	145.362
scaffold_494	107720	3	146.198
scaffold_494	108654	3	146.198
scaffold_494	78624	3	148.704
scaffold_494	51483	3	149.537
scaffold_494	38361	3	149.537
scaffold_494	38340	3	149.537
scaffold_494	1252	3	151.204
scaffold_524	119263	3	151.204
scaffold_494	1211	3	151.204
scaffold_320	119250	3	152.199
scaffold_320	45774	3	152.199
scaffold_320	45746	3	152.199
scaffold_524	95195	3	152.199
scaffold_320	17192	3	152.199
scaffold_320	92523	3	152.199
scaffold_524	91003	3	152.199
scaffold_320	45759	3	152.199
scaffold_320	38659	3	152.199
scaffold_320	128119	3	152.199
scaffold_320	187487	3	154.027
scaffold_154	266117	3	154.86
scaffold_154	186001	3	154.86
scaffold_154	127765	3	154.86
scaffold_154	220542	3	155.694
scaffold_144	17375	3	155.694
scaffold_154	226045	3	155.694
scaffold_154	85171	3	155.694
scaffold_154	85154	3	155.694
scaffold_154	85099	3	155.694
scaffold_117	205839	3	160.073
scaffold_117	3796	3	162.777
scaffold_499	101024	3	163.669
scaffold_290	44643	3	163.669
scaffold_290	44093	3	163.669
scaffold_290	218507	3	163.669
scaffold_1036	35394	3	164.562
scaffold_310	83785	3	166.092
scaffold_310	83716	3	166.092
scaffold_498	110526	3	167.919
scaffold_498	110489	3	167.919
scaffold_498	110543	3	167.919
scaffold_1439	8130	3	170.537
scaffold_1439	8125	3	170.537
scaffold_798	75242	3	170.537
scaffold_1439	8124	3	170.537
scaffold_1439	8083	3	170.537
scaffold_798	75187	3	170.537
scaffold_1158	34063	3	173.601
scaffold_691	55086	3	175.823
scaffold_403	177873	3	175.823
scaffold_691	86528	3	175.823
scaffold_828	47241	3	176.741
scaffold_403	64819	3	176.741
scaffold_403	64779	3	176.741
scaffold_828	14538	3	176.741
scaffold_828	67374	3	176.741
scaffold_828	14532	3	176.741
scaffold_551	120510	3	176.741
scaffold_828	14551	3	176.741
scaffold_828	63970	3	176.741
scaffold_908	43533	3	176.741
scaffold_828	29465	3	176.741
scaffold_908	43591	3	176.741
scaffold_403	64827	3	176.741
scaffold_311	66634	3	178.493
scaffold_311	7004	3	178.493
scaffold_1149	36087	3	178.493
scaffold_604	76902	3	178.493
scaffold_311	74567	3	178.493
scaffold_311	66699	3	178.493
scaffold_311	7071	3	178.493
scaffold_311	153440	3	179.326
scaffold_484	100405	3	179.326
scaffold_311	176527	3	180.191
scaffold_206	53967	3	181.061
scaffold_206	46503	3	181.061
scaffold_484	23897	3	181.061
scaffold_206	213204	3	181.061
scaffold_206	46511	3	181.061
scaffold_402	125670	3	181.061
scaffold_484	51867	3	181.061
scaffold_206	53994	3	181.061
scaffold_484	122484	3	181.901
scaffold_1449	14642	3	181.901
scaffold_68	258378	3	182.737
scaffold_68	380078	3	182.737
scaffold_68	201762	3	183.578
scaffold_748	36063	3	183.578
scaffold_6	155964	3	186.912
scaffold_6	101529	3	186.912
scaffold_6	155373	3	186.912
scaffold_6	264378	3	188.697
scaffold_6	490299	3	188.697
scaffold_6	273273	3	188.697
scaffold_6	273286	3	188.697
scaffold_6	182484	3	188.697
scaffold_6	490306	3	188.697
scaffold_6	322442	3	189.531
scaffold_6	322487	3	189.531
scaffold_6	416014	3	190.365
scaffold_6	725758	3	191.198
scaffold_31	300276	3	192.106
scaffold_31	182256	3	192.106
scaffold_31	81683	3	192.106
scaffold_31	111264	3	192.106
scaffold_121	297583	3	192.106
scaffold_31	321445	3	192.106
scaffold_31	87930	3	192.106
scaffold_31	81675	3	192.106
scaffold_121	13290	3	192.106
scaffold_31	392163	3	193.013
scaffold_31	403350	3	193.013
scaffold_31	389683	3	193.013
scaffold_31	340357	3	193.013
scaffold_31	528772	3	193.847
scaffold_31	528797	3	193.847
scaffold_487	57191	3	195.514
scaffold_227	203316	3	196.529
scaffold_227	203273	3	196.529
scaffold_227	40849	3	199.765
scaffold_550	19904	3	201.432
scaffold_175	270935	3	203.934
scaffold_356	168293	3	203.934
scaffold_175	270924	3	203.934
scaffold_356	177334	3	204.777
scaffold_217	134939	3	207.126
scaffold_175	33454	3	207.126
scaffold_440	48901	3	207.126
scaffold_663	39653	3	209.406
scaffold_663	39604	3	209.406
scaffold_340	202839	3	210.416
scaffold_349	49174	3	212.259
scaffold_349	49171	3	212.259
scaffold_349	103718	3	212.259
scaffold_349	49193	3	212.259
scaffold_349	95420	3	213.111
scaffold_168	290488	3	214.954
scaffold_808	22751	3	214.954
scaffold_168	82321	3	216.78
scaffold_395	175911	3	216.78
scaffold_168	82359	3	216.78
scaffold_395	44184	3	216.78
scaffold_1365	15068	3	218.264
scaffold_906	43743	3	218.264
scaffold_1122	8656	3	219.811
scaffold_1122	8658	3	219.811
scaffold_1122	8688	3	219.811
scaffold_1122	17491	3	220.645
scaffold_576	19106	3	221.494
scaffold_576	44629	3	221.494
scaffold_433	67714	3	222.462
scaffold_12	482031	3	222.462
scaffold_12	482089	3	222.462
scaffold_232	142857	3	224.248
scaffold_127	155832	3	224.248
scaffold_232	93269	3	224.248
scaffold_12	569163	3	224.248
scaffold_12	515288	3	224.248
scaffold_12	505089	3	224.248
scaffold_12	662660	3	224.248
scaffold_12	25781	3	224.248
scaffold_127	189859	3	224.248
scaffold_322	104184	3	224.248
scaffold_127	155811	3	224.248
scaffold_12	365691	3	224.248
scaffold_127	310250	3	224.248
scaffold_127	171782	3	225.086
scaffold_12	332093	3	225.086
scaffold_12	120476	3	225.086
scaffold_12	63569	3	225.086
scaffold_127	71266	3	227.325
scaffold_298	160512	3	227.325
scaffold_298	74168	3	227.325
scaffold_298	160495	3	227.325
scaffold_52	271703	3	227.325
scaffold_378	14762	3	227.325
scaffold_378	25646	3	227.325
scaffold_52	271722	3	227.325
scaffold_52	8707	3	227.325
scaffold_52	444446	3	230.365
scaffold_378	93115	3	230.365
scaffold_52	249904	3	230.365
scaffold_52	18572	3	230.365
scaffold_52	249900	3	230.365
scaffold_153	22688	3	232.7
scaffold_52	342814	3	232.7
scaffold_52	201314	3	232.7
scaffold_52	44882	3	232.7
scaffold_52	323865	3	232.7
scaffold_52	222139	3	232.7
scaffold_52	323904	3	232.7
scaffold_52	56651	3	232.7
scaffold_87	327916	3	232.7
scaffold_153	66702	3	232.7
scaffold_274	22682	3	232.7
scaffold_153	83294	3	232.7
scaffold_153	66762	3	232.7
scaffold_153	66743	3	232.7
scaffold_87	23559	3	232.7
scaffold_87	91039	3	232.7
scaffold_153	83335	3	232.7
scaffold_87	293737	3	232.7
scaffold_87	346775	3	232.7
scaffold_274	178597	3	238.463
scaffold_69	39420	3	238.463
scaffold_69	39434	3	238.463
scaffold_69	353295	3	240.558
scaffold_137	21055	3	241.681
scaffold_976	15348	3	241.681
scaffold_205	296147	3	242.887
scaffold_205	296068	3	242.887
scaffold_205	239622	3	243.831
scaffold_205	239664	3	243.831
scaffold_205	279737	3	243.831
scaffold_205	279007	3	243.831
scaffold_205	239665	3	243.831
scaffold_706	7720	3	245.538
scaffold_623	106394	3	245.538
scaffold_623	106414	3	245.538
scaffold_418	13028	3	245.538
scaffold_623	58419	3	245.538
scaffold_205	86121	3	245.538
scaffold_205	21489	3	245.538
scaffold_205	56106	3	245.538
scaffold_418	16696	3	245.538
scaffold_418	78151	3	246.395
scaffold_667	6715	3	247.257
scaffold_582	5644	3	247.257
scaffold_582	93854	3	248.108
scaffold_1260	14876	3	250.344
scaffold_1260	14863	3	250.344
scaffold_670	11013	3	253.105
scaffold_670	11014	3	253.105
scaffold_757	50880	3	255.571
scaffold_757	50853	3	255.571
scaffold_762	35746	3	257.785
scaffold_1014	32421	3	260.948
scaffold_762	15113	3	260.948
scaffold_939	46582	3	260.948
scaffold_1067	42882	3	260.948
scaffold_762	15120	3	260.948
scaffold_1014	7945	3	260.948
scaffold_939	46579	3	260.948
scaffold_737	67815	3	265.795
scaffold_1489	20947	3	273.932
scaffold_1489	21020	3	273.932
scaffold_1489	20995	3	273.932
scaffold_878	49010	3	273.932
scaffold_878	28362	3	273.932
scaffold_1321	21825	3	273.932
scaffold_878	28355	3	273.932
scaffold_2302	5518	3	280.256
scaffold_989	9524	3	280.256
scaffold_989	13550	3	280.256
scaffold_989	9481	3	280.256
scaffold_534	154687	3	280.256
scaffold_534	17646	3	280.256
scaffold_534	87426	3	280.256
scaffold_534	17649	3	280.256
scaffold_1464	12810	3	280.256
scaffold_534	17635	3	280.256
scaffold_534	17609	3	280.256
scaffold_1464	4517	3	280.256
scaffold_799	26670	3	282.619
scaffold_583	91864	3	282.619
scaffold_799	15788	3	282.619
scaffold_583	91879	3	282.619
scaffold_534	9616	3	282.619
scaffold_1697	12731	3	282.619
scaffold_583	116931	3	282.619
scaffold_583	63419	3	284.327
scaffold_552	107903	3	285.199
scaffold_552	107870	3	285.199
scaffold_1051	45687	3	285.199
scaffold_552	70113	3	285.199
scaffold_583	44308	3	285.199
scaffold_689	97808	3	287.161
scaffold_689	77968	3	287.161
scaffold_689	97869	3	287.161
scaffold_689	77976	3	287.161
scaffold_689	89308	3	287.161
scaffold_299	195676	3	290.43
scaffold_299	168972	3	290.43
scaffold_299	199877	3	290.43
scaffold_96	296736	3	292.945
scaffold_96	296774	3	292.945
scaffold_96	296808	3	292.945
scaffold_1579	19507	3	302.229
scaffold_1216	17474	3	305.567
scaffold_158	94409	3	307.343
scaffold_158	94392	3	307.343
scaffold_653	57137	3	307.343
scaffold_158	70077	3	307.343
scaffold_158	32405	3	307.343
scaffold_601	53538	3	307.343
scaffold_223	24033	3	307.343
scaffold_764	79244	3	323.813
scaffold_653	57145	3	323.813
scaffold_223	56543	3	323.813
scaffold_601	63284	3	323.813
scaffold_158	94393	3	323.813
scaffold_601	7276	3	323.813
scaffold_158	94389	3	323.813
scaffold_601	104720	3	323.813
scaffold_653	85287	3	323.813
scaffold_518	66895	3	323.813
scaffold_158	322803	3	323.813
scaffold_1250	11327	3	323.813
scaffold_518	15482	3	323.813
scaffold_518	15494	3	323.813
scaffold_1017	3142	3	338.074
scaffold_844	2361	3	338.074
scaffold_764	13810	3	338.074
scaffold_764	13779	3	338.074
scaffold_764	13736	3	338.074
scaffold_438	42601	3	338.074
scaffold_567	114500	3	351.554
scaffold_567	114483	3	351.554
scaffold_96	78637	3	362.721
scaffold_96	111260	3	362.721
scaffold_269	50552	3	393.663
scaffold_910	16049	3	394.66
scaffold_992	10798	3	394.66
scaffold_373	192004	3	394.66
scaffold_981	28334	3	394.66
scaffold_371	22902	3	395.761
scaffold_416	151359	3	395.761
scaffold_2337	3800	3	395.761
scaffold_504	149471	3	397.561
scaffold_665	3783	3	397.561
scaffold_665	3742	3	397.561
scaffold_1558	4098	3	397.561
scaffold_971	29388	3	397.561
scaffold_853	33540	3	397.561
scaffold_853	33526	3	397.561
scaffold_823	21358	3	397.561
scaffold_665	28402	3	397.561
scaffold_665	28421	3	397.561
scaffold_1357	764	3	400.711
scaffold_1357	783	3	400.711
scaffold_820	45739	3	400.711
scaffold_842	19637	3	400.711
scaffold_1374	11124	3	400.711
scaffold_217	194176	3	428.741
scaffold_1167	22614	3	435.215
scaffold_1167	11844	3	435.215
scaffold_663	53508	3	435.215
scaffold_663	59748	3	435.215
scaffold_1	1436357	4	0
scaffold_1	1291878	4	0
scaffold_1	1368191	4	0
scaffold_1	1291835	4	0
scaffold_1	1247635	4	0
scaffold_1	1291825	4	0
scaffold_1	1336522	4	0
scaffold_1	1180904	4	0.833411
scaffold_1	1101101	4	0.833411
scaffold_1	1101098	4	0.833411
scaffold_1	981030	4	4.1717
scaffold_1	778957	4	4.1717
scaffold_1	779017	4	4.1717
scaffold_1	634729	4	4.1717
scaffold_1	950743	4	4.1717
scaffold_1	1010259	4	4.1717
scaffold_1	972596	4	4.1717
scaffold_1	972666	4	4.1717
scaffold_1	997689	4	4.1717
scaffold_1	997698	4	4.1717
scaffold_1	607732	4	5.00511
scaffold_1	607753	4	5.00511
scaffold_1	607747	4	5.00511
scaffold_1	381154	4	7.50719
scaffold_1	342018	4	8.3406
scaffold_1	342021	4	8.3406
scaffold_1	289026	4	9.17401
scaffold_1	79917	4	10.0074
scaffold_1	71772	4	10.0074
scaffold_1	71802	4	10.0074
scaffold_470	46401	4	10.0074
scaffold_2258	2265	4	10.0074
scaffold_411	44637	4	11.7871
scaffold_411	44590	4	11.7871
scaffold_411	44617	4	11.7871
scaffold_4	754948	4	15.8749
scaffold_4	702553	4	15.8749
scaffold_4	684521	4	15.8749
scaffold_4	441087	4	16.9176
scaffold_4	355923	4	18.0478
scaffold_4	259872	4	18.0478
scaffold_4	253203	4	18.0478
scaffold_4	253241	4	18.0478
scaffold_4	79652	4	20.0835
scaffold_4	12256	4	22.0315
scaffold_585	42165	4	23.5903
scaffold_103	333844	4	29.3474
scaffold_103	333825	4	29.3474
scaffold_103	226502	4	31.0725
scaffold_8	211833	4	31.0725
scaffold_8	99088	4	31.0725
scaffold_2329	2327	4	31.0725
scaffold_103	365508	4	31.0725
scaffold_8	398093	4	34.1742
scaffold_8	486074	4	35.0725
scaffold_8	670974	4	35.9708
scaffold_8	690169	4	35.9708
scaffold_8	690146	4	35.9708
scaffold_8	670936	4	35.9708
scaffold_8	637741	4	35.9708
scaffold_8	603387	4	35.9708
scaffold_8	622861	4	35.9708
scaffold_8	637745	4	35.9708
scaffold_8	760111	4	37.7083
scaffold_8	718943	4	37.7083
scaffold_8	718944	4	37.7083
scaffold_776	67952	4	39.4458
scaffold_526	124068	4	40.8368
scaffold_526	27459	4	40.8368
scaffold_860	2791	4	40.8368
scaffold_526	3443	4	40.8368
scaffold_869	12889	4	40.8368
scaffold_708	63570	4	40.8368
scaffold_588	109702	4	44.8017
scaffold_588	109667	4	44.8017
scaffold_588	9029	4	44.8017
scaffold_1781	14001	4	44.8017
scaffold_1141	33001	4	49.653
scaffold_1141	29442	4	49.653
scaffold_683	84882	4	53.1239
scaffold_1110	50994	4	54.8132
scaffold_1110	51047	4	54.8132
scaffold_598	128498	4	55.7396
scaffold_297	201027	4	57.659
scaffold_334	103710	4	57.659
scaffold_297	9200	4	57.659
scaffold_1444	8025	4	57.659
scaffold_334	85846	4	57.659
scaffold_485	118557	4	57.659
scaffold_297	175326	4	57.659
scaffold_297	162079	4	57.659
scaffold_485	129989	4	57.659
scaffold_334	71145	4	57.659
scaffold_297	9207	4	57.659
scaffold_485	102424	4	58.7401
scaffold_115	335185	4	63.5596
scaffold_1057	14140	4	63.5596
scaffold_1009	4246	4	63.5596
scaffold_1057	19432	4	63.5596
scaffold_1057	19490	4	63.5596
scaffold_115	244106	4	64.8547
scaffold_115	184800	4	64.8547
scaffold_115	12222	4	65.87
scaffold_391	134041	4	66.9187
scaffold_476	2862	4	66.9187
scaffold_391	130831	4	66.9187
scaffold_391	134026	4	66.9187
scaffold_391	130784	4	66.9187
scaffold_476	104406	4	66.9187
scaffold_391	133999	4	66.9187
scaffold_391	130798	4	66.9187
scaffold_898	37614	4	68.6273
scaffold_898	37545	4	68.6273
scaffold_816	13796	4	69.4662
scaffold_329	59610	4	70.3687
scaffold_329	23870	4	70.3687
scaffold_329	39140	4	70.3687
scaffold_329	37191	4	70.3687
scaffold_329	81173	4	70.3687
scaffold_329	81105	4	70.3687
scaffold_329	174231	4	72.5578
scaffold_638	32587	4	72.5578
scaffold_816	41736	4	72.5578
scaffold_638	60606	4	75.3771
scaffold_1072	23125	4	79.299
scaffold_432	131756	4	79.299
scaffold_432	29415	4	79.299
scaffold_432	133648	4	79.299
scaffold_432	116101	4	79.299
scaffold_346	16537	4	79.299
scaffold_346	38207	4	79.299
scaffold_272	230679	4	84.7392
scaffold_272	136096	4	84.7392
scaffold_272	110524	4	84.7392
scaffold_272	109326	4	84.7392
scaffold_272	245904	4	84.7392
scaffold_246	161311	4	84.7392
scaffold_545	85260	4	89.9636
scaffold_545	85261	4	89.9636
scaffold_545	85255	4	89.9636
scaffold_246	14546	4	89.9636
scaffold_246	25459	4	89.9636
scaffold_916	28677	4	91.9581
scaffold_372	25323	4	92.7916
scaffold_532	83811	4	96.8432
scaffold_640	40143	4	98.8103
scaffold_213	50328	4	98.8103
scaffold_213	215450	4	98.8103
scaffold_213	215401	4	98.8103
scaffold_213	117561	4	98.8103
scaffold_273	182216	4	99.7612
scaffold_273	158701	4	99.7612
scaffold_273	20181	4	100.783
scaffold_273	20187	4	100.783
scaffold_123	247495	4	100.783
scaffold_273	20148	4	100.783
scaffold_273	20162	4	100.783
scaffold_123	212330	4	100.783
scaffold_273	38419	4	100.783
scaffold_123	119921	4	101.736
scaffold_50	306032	4	103.261
scaffold_50	223381	4	103.261
scaffold_50	110812	4	103.261
scaffold_50	223344	4	103.261
scaffold_50	306646	4	103.261
scaffold_50	110763	4	103.261
scaffold_50	185253	4	103.261
scaffold_50	357630	4	103.261
scaffold_35	34495	4	104.786
scaffold_35	253794	4	104.786
scaffold_181	25954	4	106.899
scaffold_35	297081	4	106.899
scaffold_181	24920	4	106.899
scaffold_35	521477	4	106.899
scaffold_35	373479	4	106.899
scaffold_181	50014	4	106.899
scaffold_181	25325	4	106.899
scaffold_181	48213	4	106.899
scaffold_35	381643	4	106.899
scaffold_181	25394	4	106.899
scaffold_181	44978	4	106.899
scaffold_181	160912	4	106.899
scaffold_181	146836	4	106.899
scaffold_181	95624	4	106.899
scaffold_181	158821	4	106.899
scaffold_35	482364	4	106.899
scaffold_35	367360	4	106.899
scaffold_35	367324	4	106.899
scaffold_351	107025	4	109.121
scaffold_351	42125	4	109.121
scaffold_351	156333	4	111.743
scaffold_35	36965	4	111.743
scaffold_351	171176	4	111.743
scaffold_48	146061	4	111.743
scaffold_48	73672	4	111.743
scaffold_48	184131	4	111.743
scaffold_48	291364	4	114.189
scaffold_48	453025	4	114.189
scaffold_48	433575	4	114.189
scaffold_48	433588	4	114.189
scaffold_48	433586	4	114.189
scaffold_48	478333	4	114.189
scaffold_48	478317	4	114.189
scaffold_49	399446	4	115.06
scaffold_49	381416	4	115.907
scaffold_49	181999	4	118.478
scaffold_49	53202	4	118.478
scaffold_49	53165	4	118.478
scaffold_341	28451	4	121.851
scaffold_345	139647	4	121.851
scaffold_11	238309	4	121.851
scaffold_345	133069	4	121.851
scaffold_341	156911	4	121.851
scaffold_341	156884	4	121.851
scaffold_256	230326	4	121.851
scaffold_256	230324	4	121.851
scaffold_11	594758	4	121.851
scaffold_11	594792	4	121.851
scaffold_11	594733	4	121.851
scaffold_256	230348	4	121.851
scaffold_341	216843	4	121.851
scaffold_49	201790	4	121.851
scaffold_11	255097	4	121.851
scaffold_11	535953	4	124.939
scaffold_11	560044	4	124.939
scaffold_11	535933	4	124.939
scaffold_11	535974	4	124.939
scaffold_11	535959	4	124.939
scaffold_11	569285	4	124.939
scaffold_11	232350	4	126.204
scaffold_259	138175	4	127.037
scaffold_259	138157	4	127.037
scaffold_200	105493	4	130.946
scaffold_200	63846	4	130.946
scaffold_200	49063	4	130.946
scaffold_200	40792	4	130.946
scaffold_200	49085	4	130.946
scaffold_200	12368	4	130.946
scaffold_809	35177	4	134.655
scaffold_809	35169	4	134.655
scaffold_366	190551	4	134.655
scaffold_462	14453	4	134.655
scaffold_366	197991	4	134.655
scaffold_462	14488	4	134.655
scaffold_809	35182	4	134.655
scaffold_366	156882	4	137.396
scaffold_119	23512	4	137.396
scaffold_366	184189	4	137.396
scaffold_366	184175	4	137.396
scaffold_119	214763	4	140.174
scaffold_366	36278	4	140.174
scaffold_119	41810	4	140.174
scaffold_119	41874	4	140.174
scaffold_366	60454	4	140.174
scaffold_119	315758	4	140.174
scaffold_119	322566	4	140.174
scaffold_119	289024	4	140.174
scaffold_142	60867	4	141.643
scaffold_142	137349	4	141.643
scaffold_366	80525	4	141.643
scaffold_136	328449	4	141.643
scaffold_142	16466	4	141.643
scaffold_142	343685	4	141.643
scaffold_142	346925	4	141.643
scaffold_142	343635	4	141.643
scaffold_369	14918	4	141.643
scaffold_142	343658	4	141.643
scaffold_369	105415	4	141.643
scaffold_369	9908	4	141.643
scaffold_369	76756	4	141.643
scaffold_366	80490	4	141.643
scaffold_369	76729	4	141.643
scaffold_136	228086	4	142.777
scaffold_136	227707	4	142.777
scaffold_136	173753	4	144.444
scaffold_136	81447	4	144.444
scaffold_136	189859	4	144.444
scaffold_136	189851	4	144.444
scaffold_136	189838	4	144.444
scaffold_136	212256	4	144.444
scaffold_42	280267	4	145.291
scaffold_42	73506	4	145.291
scaffold_42	71107	4	145.291
scaffold_366	91874	4	145.291
scaffold_366	91930	4	145.291
scaffold_42	367999	4	146.334
scaffold_42	450774	4	146.334
scaffold_42	438560	4	146.334
scaffold_42	367973	4	146.334
scaffold_42	450754	4	146.334
scaffold_136	271754	4	146.334
scaffold_242	165524	4	149.784
scaffold_242	165527	4	149.784
scaffold_242	210876	4	149.784
scaffold_242	25866	4	149.784
scaffold_89	120953	4	149.784
scaffold_89	134071	4	149.784
scaffold_89	139418	4	149.784
scaffold_959	23818	4	151.596
scaffold_1066	15383	4	151.596
scaffold_242	134292	4	151.596
scaffold_89	107662	4	151.596
scaffold_770	37730	4	152.429
scaffold_1356	12272	4	152.429
scaffold_1356	409	4	152.429
scaffold_1780	7263	4	152.429
scaffold_569	117825	4	152.429
scaffold_784	11637	4	152.429
scaffold_183	255698	4	153.512
scaffold_183	296378	4	153.512
scaffold_406	154826	4	153.512
scaffold_1240	17802	4	153.512
scaffold_406	148801	4	153.512
scaffold_113	94506	4	156.072
scaffold_183	222966	4	156.072
scaffold_183	211833	4	156.072
scaffold_40	92105	4	156.958
scaffold_113	44127	4	156.958
scaffold_40	135120	4	156.958
scaffold_40	111319	4	156.958
scaffold_40	173723	4	157.914
scaffold_40	173717	4	157.914
scaffold_40	173645	4	157.914
scaffold_40	474079	4	161.851
scaffold_40	457141	4	161.851
scaffold_40	416496	4	161.851
scaffold_40	436193	4	161.851
scaffold_40	515183	4	164.329
scaffold_57	1751	4	165.162
scaffold_282	184395	4	165.162
scaffold_57	147465	4	165.162
scaffold_282	174171	4	165.162
scaffold_282	212430	4	165.162
scaffold_98	360855	4	172.429
scaffold_98	360892	4	172.429
scaffold_98	272118	4	172.429
scaffold_98	360854	4	172.429
scaffold_98	272028	4	172.429
scaffold_98	360887	4	172.429
scaffold_98	272010	4	172.429
scaffold_98	141812	4	174.647
scaffold_98	216916	4	174.647
scaffold_185	44363	4	176.314
scaffold_749	62366	4	176.314
scaffold_185	186185	4	177.981
scaffold_956	32815	4	179.854
scaffold_66	245376	4	182.124
scaffold_66	84204	4	182.124
scaffold_66	249703	4	182.124
scaffold_66	245642	4	182.124
scaffold_66	84254	4	182.124
scaffold_66	286322	4	185.256
scaffold_66	286366	4	185.256
scaffold_66	289980	4	185.256
scaffold_66	345235	4	188.002
scaffold_66	345275	4	188.002
scaffold_66	345236	4	188.002
scaffold_66	323083	4	188.002
scaffold_66	295458	4	188.002
scaffold_25	40995	4	191.866
scaffold_25	41008	4	191.866
scaffold_25	41033	4	191.866
[truncated: 1,156 more rows]
